# Supplementary material for: Integrative Functional Transcriptomic Analyses Implicate Shared Molecular Circuits in Sensorineural Hearing Loss
Source: Frontiers journal article supplement (doi:10.3389/fncel.2022.857344), 2022-03-14
Supplement: Data_Sheet_2.pdf [file Data_Sheet_2.pdf]

## Supplementary Figures

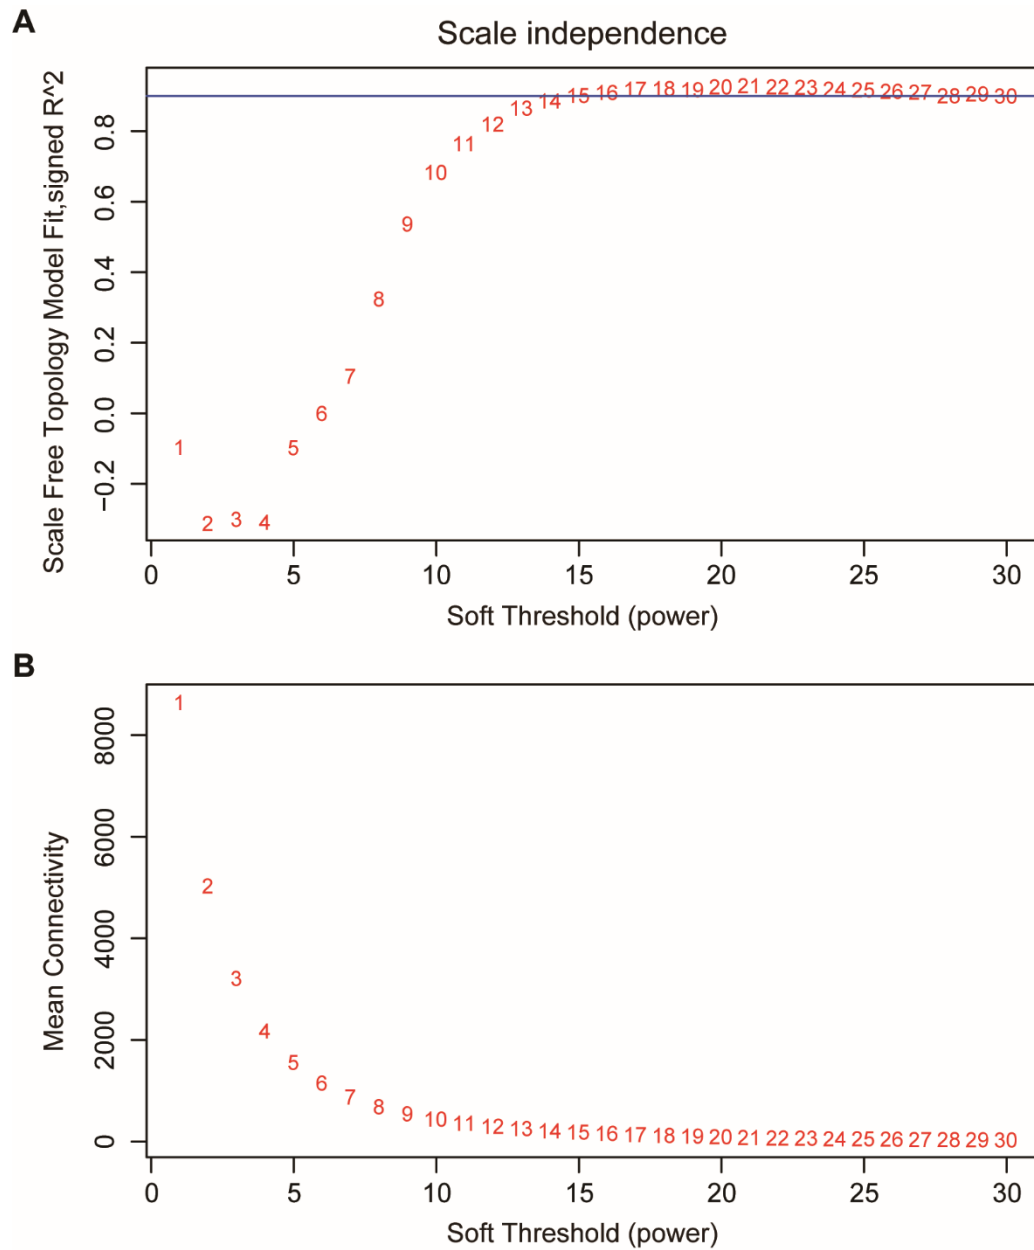

**Supplemental Figure 1.** Scale-free topology fit index and mean connectivity as a function of the soft-thresholding power. Scale independence (**A**) and mean connectivity (**B**) indicate 15 as the soft threshold. The blue line shows  $R^2 = 0.9$ .

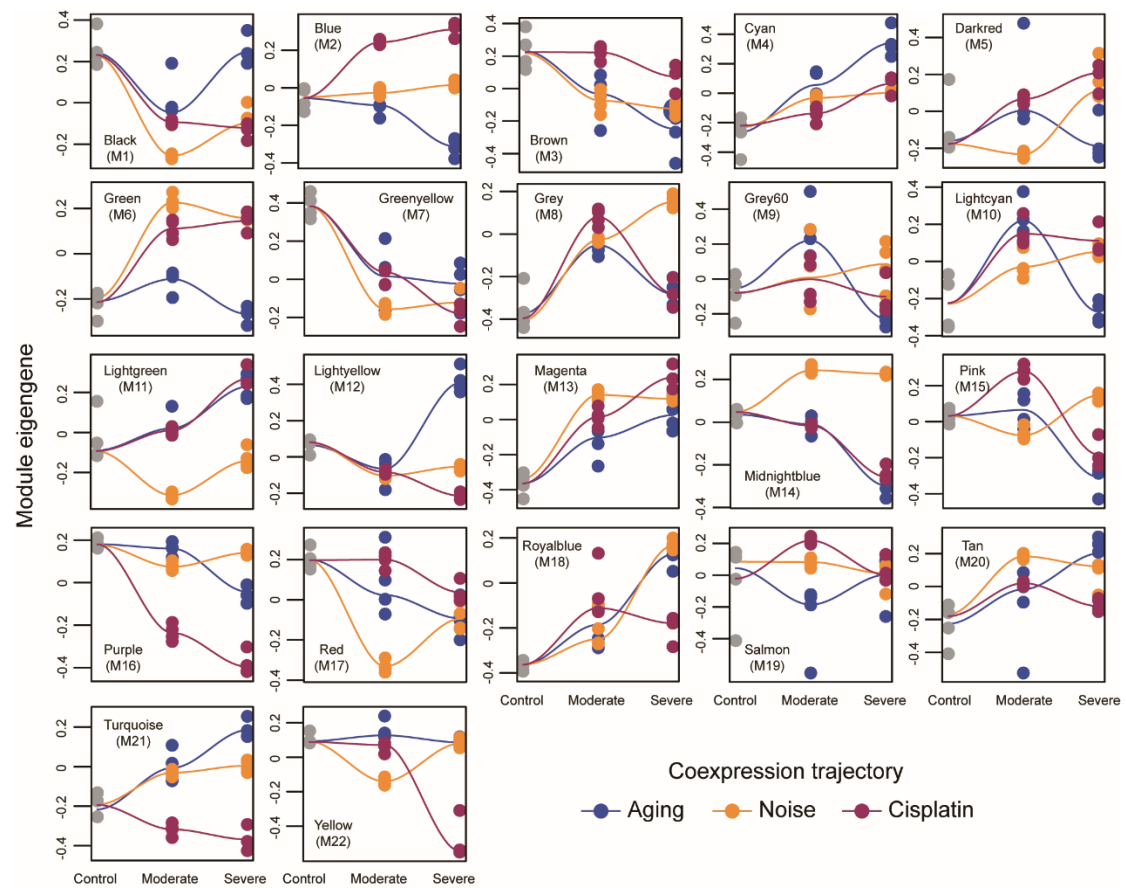

**Supplemental Figure 2.** The coexpression trajectories of the 22 modules. The WGCNA yielded 22 modules represented by colors and we relabeled them numerically. The coexpression trajectories during aging-, noise-, and cisplatin-induced hearing loss were plotted by different colors. The fit line represents locally weighted scatterplot smoothing.

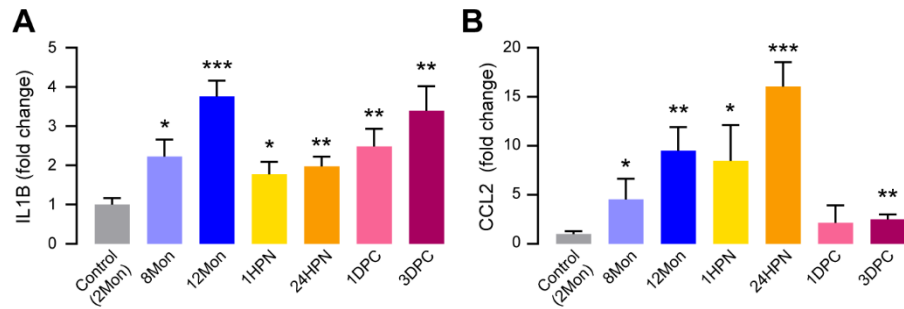

**Supplemental Figure 3.** qRT-PCR verification for *IL1B* (A) and *CCL2* (B) mRNA levels in the cochleae from the three types of SNHL mouse models. The three types of SNHL mouse models are present in columns with different colors. Mon: months; HPN: hour post noise exposure; DPC: day post cisplatin injection. All the columns are present with Mean  $\pm$  SD,  $n = 3$  for each column. \*  $P < 0.05$ , \*\*  $P < 0.01$ , \*\*\*  $P < 0.001$ .  $P$ -value is calculated by the two-tailed Student's  $t$ -test.

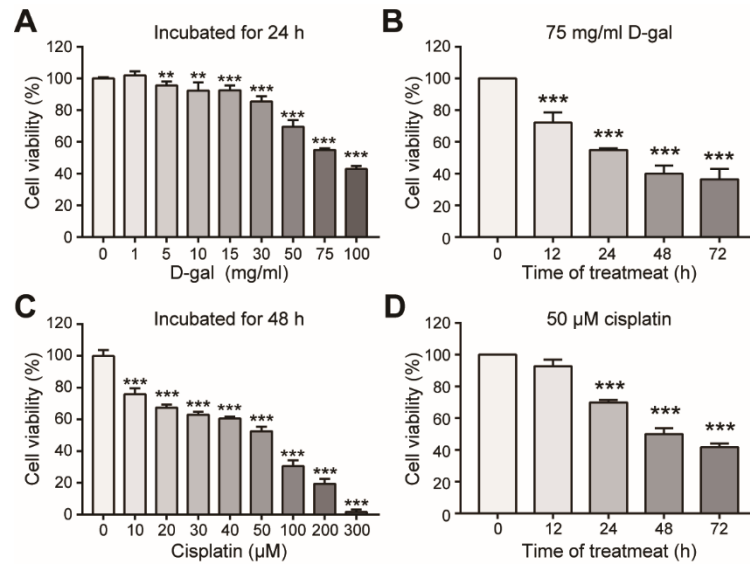

**Supplemental Figure 4.** Establishment for *in vitro* aging and ototoxicity models in HEI-OC1 cells. **(A)** Cell viability after the treatments with the designated concentration of D-gal for 24 h. **(B)** Cell viability after the treatments with 75 mg/ml D-gal for the designated periods. **(C)** Cell viability after the treatments with the designated concentration of cisplatin for 48 h. **(D)** Cell viability after the treatments with 50 μM cisplatin for the designated periods. Cell viability was measured by the cell proliferation assay kit. All the columns are present with Mean ± SD,  $n = 6$  for each column. \*\*  $P < 0.01$ , \*\*\*  $P < 0.001$ .  $P$ -value is calculated by the two-tailed Student's  $t$ -test.

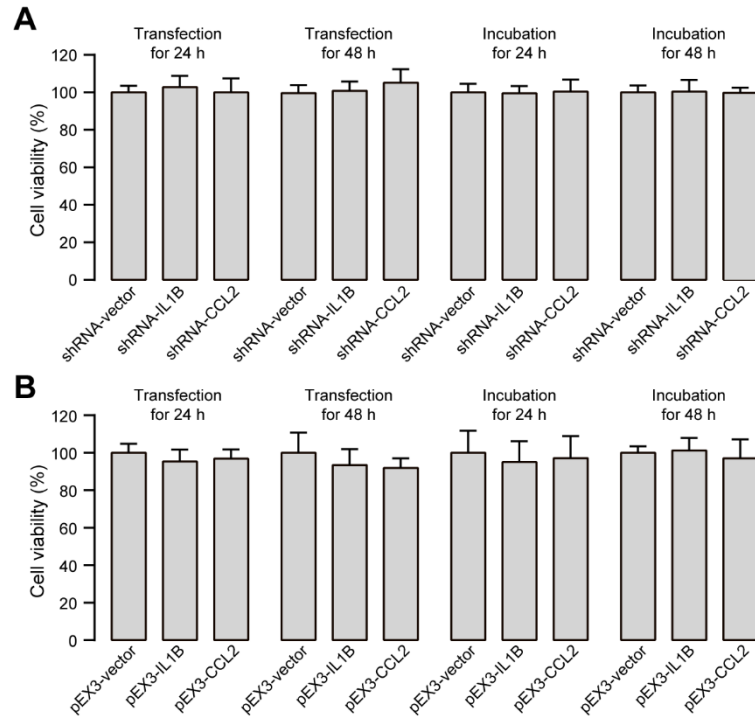

**Supplemental Figure 5.** Cell viability in HEI-OC1 cells after modulation of *IL1B* and *CCL2*. **(A)** Cell viability after the treatments with shRNA-IL1B and shRNA-CCL2 transfection (24 h and 48 h) and the following incubation (24 h and 48 h). **(B)** Cell viability after the treatments with pEX3-IL1B and pEX3-CCL2 transfection (24 h and 48 h) and the following incubation (24 h and 48 h). Cell viability was measured by the cell proliferation assay kit. All the columns are present with Mean  $\pm$  SD,  $n = 6$  for each column.  $P$ -value is calculated by the two-tailed Student's  $t$ -test.

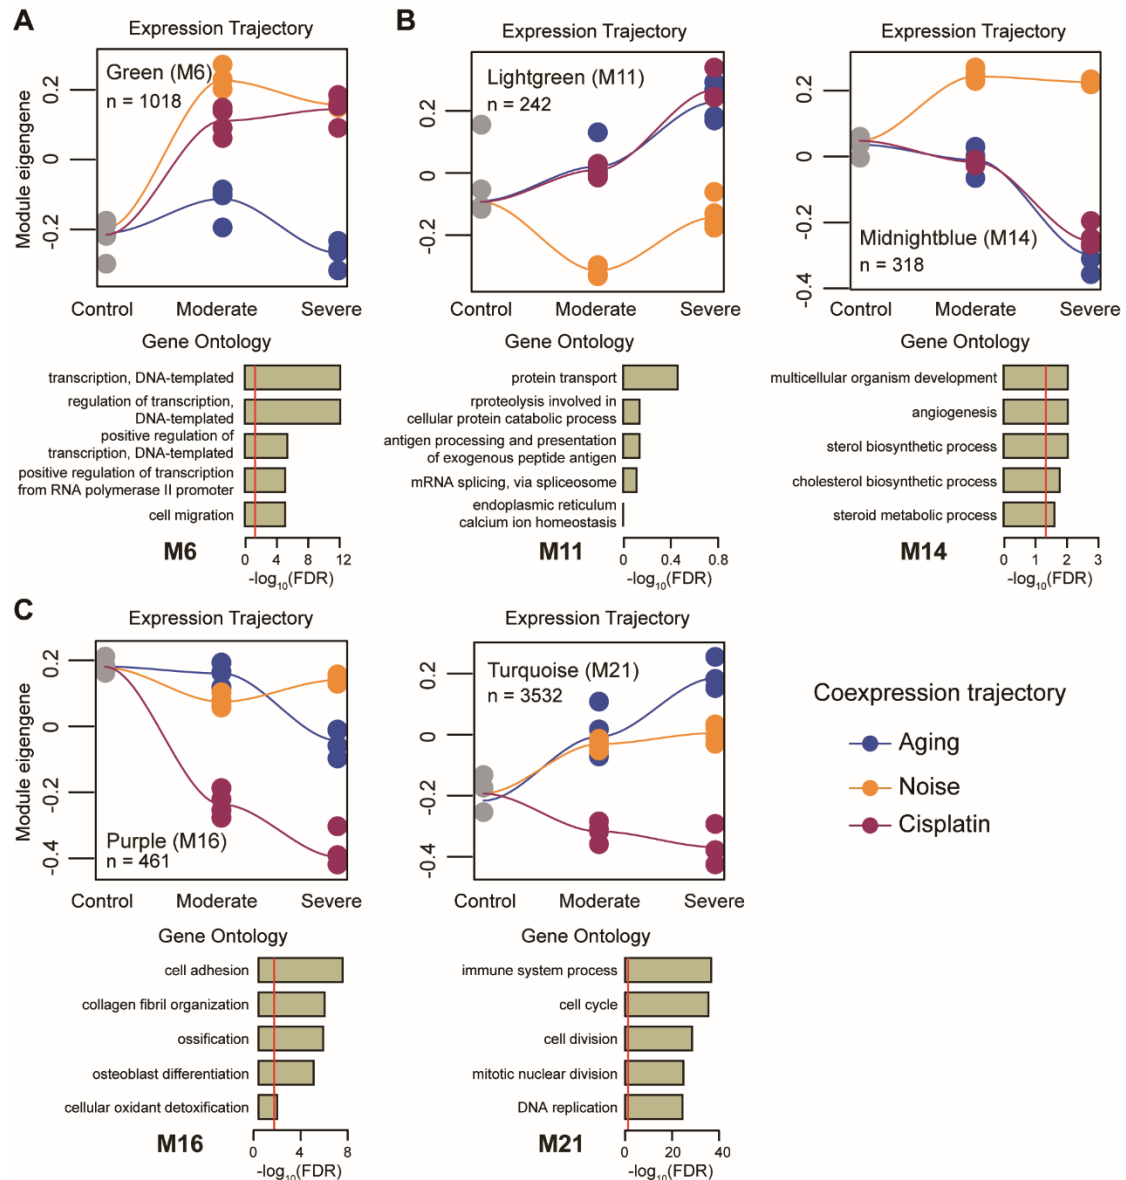

**Supplemental Figure 6.** Representative modules and their Top5 GO enrichments refer to aging-, noise-, and ototoxicity-induced SNHL independence. (A) M6 refers to aging-induced SNHL independence. (B) M11 and M14 refer to noise-induced SNHL independence. (C) M16 and M21 refer to cisplatin-induced SNHL independence. Coexpression trajectories of aging, noise, and cisplatin models were plotted by different colors. The fit line represents locally weighted scatterplot smoothing. n shows the numbers of the genes in each module. The reports of  $-\log_{10}(\text{FDR})$  represent relative enrichment in each module, with the red line at  $\text{FDR} = 0.05$ .
