# Supplementary material for: Integrative Functional Transcriptomic Analyses Implicate Shared Molecular Circuits in Sensorineural Hearing Loss
Source: Front Cell Neurosci. 2022 Mar 14;16:857344. doi: 10.3389/fncel.2022.857344 (PMC8964368; doi:10.3389/fncel.2022.857344)
Supplement: Supplementary file 1 [file Data_Sheet_1.XLSX]

## Sheet: Sheet 1
Supplemental Table 1. The cochlear transcriptomic data across 27 samples from three types of SNHL mice.
Samples	Clean Reads	Read Length	# of Bases (Gb)	Q20 (%)	GC (%)	Mapping Rate (%)
2Mon 01	41494444	150	5.79671	96.23	48.13	88.1
2Mon 02	41472296	150	5.79361	95.84	48.3	87.4
2Mon 03	41568802	150	5.80709	96.1	47.66	88.7
2Mon 04	41887174	150	5.85157	96.22	47.94	88.8
8Mon 01	56345132	150	7.87132	96.95	48.62	92.3
8Mon 02	62574982	150	8.74162	96.94	48.62	92
8Mon 03	58245690	150	8.13683	96.92	48.41	91.1
8Mon 04	62857730	150	8.78112	96.85	48.91	92.1
12Mon 01	41735594	150	5.8304	96.12	48.07	88.5
12Mon 02	43101862	150	6.02126	96.23	48.32	88.6
12Mon 03	41441216	150	5.78927	96.23	48.38	88.6
12Mon 04	41337356	150	5.77476	96.29	48.23	88.9
1HPN 01	54167206	150	7.56707	95.95	48.79	79.4
1HPN 02	54353510	150	7.5931	95.86	48.59	78.7
1HPN 03	54033276	150	7.54836	95.9	48.39	79.1
1HPN 04	53744070	150	7.50796	95.61	48.39	78.3
24HPN 01	54609106	150	7.6288	95.76	48.71	79.6
24HPN 02	54411392	150	7.60118	95.86	48.68	79.7
24HPN 03	54549516	150	7.62048	95.7	48.61	79
24HPN 04	53923238	150	7.53299	95.94	48.8	80.2
1DPC 01	63567600	150	8.88029	97	48.41	91.7
1DPC 02	62978860	150	8.79805	96.57	48.46	91.3
1DPC 03	62916290	150	8.7893	96.44	48.25	91.3
1DPC 04	62510874	150	8.73267	96.83	48.37	92
3DPC 01	62485768	150	8.72916	96.74	48.39	92.1
3DPC 02	62648646	150	8.75191	96.83	48.58	92.2
3DPC 03	62857094	150	8.78103	97	48.56	92.1

## Sheet: Sheet 2
Supplemental Table 2. A total of 22 gene coexpression modules identified with WGCNA.
Black (M1)	Blue (M2)	Brown (M3)	Cyan (M4)	Darkred (M5)	Green (M6)	Greenyellow (M7)	Grey (M8)	Grey60 (M9)	Lightcyan (M10)	Lightgreen (M11)	Lightyellow (M12)	Magenta (M13)	Midnightblue (M14)	Pink (M15)	Purple (M16)	Red (M17)	Royalblue (M18)	Salmon (M19)	Tan (M20)	Turquoise (M21)	Yellow (M22)
n = 674	n = 2737	n = 1900	n = 339	n = 186	n = 1018	n = 442	n = 421	n = 242	n = 307	n = 242	n = 241	n = 534	n = 318	n = 553	n = 461	n = 807	n = 194	n = 382	n = 385	n = 3532	n = 1125
AARSD1	AAK1	A2M	ABCA7	ABHD11	ABCA1	ABHD10	ABCG4	ABCA4	ABCF1	AAAS	AAGAB	ABHD15	AA986860	AARS2	ABCG2	A4GALT	ACVRL1	ABCC5	ACAP2	AA467197	AASDH
AASDHPPT	AAR2	A2ML1	ABHD5	ACRBP	ABCF2	ABHD12	ACHE	ABHD1	ADAM11	ABRAXAS2	ABCD2	ABI1	ABCA8A	ABCA8B	ACAN	AAMDC	ADAR	ABHD18	ADAMTS3	AACS	ABCA9
ABCG1	AARS	AATK	ACER3	ADRM1	ABHD2	ACSL3	ACKR1	ACAA2	ADGB	ACADL	ACTR2	ACOT9	ABCC9	ABCD4	ACP1	AAMP	ALG12	ACBD3	ADNP2	AATF	ABHD16A
ABHD17A	ABCA3	ABAT	ACP5	AI837181	ABTB2	ACYP2	ACTR10	ACADS	ADGRG6	ACBD6	ADAT2	ACSL4	ABI3BP	ABHD14A	ADAM12	AARD	AMPD2	ACOX3	AFF2	AB124611	ABITRAM
ABHD17B	ABCA5	ABCA2	ADAM8	AKT1S1	ACACA	ADCK1	ADAMTS5	ACTC1	AGA	APPBP2OS	ADSS	ACTR5	ACO1	ABLIM1	ADAMTSL3	AASS	ANKRA2	ADD3	AGO2	ABCA13	ABRAXAS1
ACOT13	ABCA6	ABCB1A	ADCY3	AP1S1	ACE2	ADK	ADAT3	ACTN2	AGR2	ARF1	ADTRP	ADAMTS9	ACSF2	AC124108.1	ADCY5	ABCB8	APOF	AEBP2	AKAP10	ABCB4	ACAA1A
ACTR6	ABCB1B	ABCB9	ADSSL1	APOE	ACLY	AHCYL2	ADCY4	ACTN3	AGR3	ARGLU1	AKIRIN1	ADAP2	ACTA2	AC132253.9	AFG1L	ABCD3	APOL9A	AGO1	AKAP13	ABCB6	ACAD10
ADAP1	ABCC10	ABCC8	ANAPC15	AQP11	ACOX2	AHI1	AFTPH	AK8	AK7	ARL6IP4	ALAS1	ADAP2OS	ACTG2	AC165962.1	AFG3L2	ABHD11OS	APOL9B	AGO4	ALKBH8	ABCB7	ACAD11
ADH5	ABCF3	ABHD3	ANXA3	ARMC5	ACTN4	AIFM3	AKAP7	ANKRD1	AMD2	ARRDC1	ALDH1B1	AFF1	ADAMTS2	ACY3	AGMO	ABT1	ATF6B	ALS2	ALMS1	ABCC1	ACAD12
ADPRH	ABHD13	ABHD6	AP1M1	ASPSCR1	ACVR1	AK3	ALG13	ANKRD23	ARMC4	ASS1	ALDH9A1	AKT1	ADAMTS6	ADAMTS10	AK5	ACAD8	BLOC1S6	ANKRD26	ANAPC1	ABCC3	ACAD9
ADRA2C	ABHD14B	ABHD8	APAF1	ATP6V1F	ADCYAP1R1	APLP2	ALPL	ANKRD9	ARMC6	AUP1	ANAPC10	AMPD3	ADAMTS7	ADCK2	AKR1C14	ACADSB	BRF1	ANKRD33B	ANGEL2	ABCC4	ACADM
AKIRIN2	ABHD4	ABLIM2	APOC2	BCAM	ADGRF5	APOO	AMD1	APOBEC2	AU040972	BC004004	ANP32A	ANAPC7	ADAMTSL2	ADH7	ALAS2	ACOT11	BST2	AP1AR	ANKIB1	ABCD1	ACAT1
AKR1A1	ABI2	ABLIM3	ARHGAP27	BCDIN3D	ADGRL2	APTX	ANKRD50	ART1	BAHD1	BET1L	AP1G1	ANKS1	ADGRD1	AGBL2	ALCAM	ACTN1	C1RA	APPBP2	ANKLE2	ABCE1	ACOT8
ALG5	ABL1	ABR	ARSB	BOK	ADNP	ARL3	ARHGAP22	ASB11	BC022960	BLOC1S2	AP3S1	ANXA11	AGTPBP1	AGBL5	ALG14	ACTR8	C3AR1	APPL1	ANKRD28	ABCG3	ACP2
ANAPC13	ABL2	ACAT2	ASPRV1	C2	AGAP1	ARNT2	ARL15	ASB16	BC051019	BRMS1	APMAP	ANXA2	AIG1	AGL	ANAPC11	ADAM15	C4B	ARAP2	AP1S3	ABHD17C	ACP6
ANAPC4	ACACB	ACBD4	ATP6V0D2	C87436	AGFG1	ARXES1	ARMH3	ASB5	BMP2	CABLES2	ARL6IP1	AOC2	AKAP9	AKAP17B	ANKRD35	ADAM33	CCR5	ARCN1	AP5M1	ABI3	ACYP1
ANO10	ACADVL	ACBD5	B4GALT1	CALML4	AHNAK	ASPA	ASB6	ATP2A1	BRICD5	CCDC59	ARMC10	AP4E1	ANGPTL1	AKT2	ANKRD37	ADH1	CD274	ATF2	API5	ABRACL	ADAL
AP1S2	ACCS	ACBD7	BCL10	CBLN1	AHR	ATP5B	ASNS	ATP5G1	CACNA1E	CCHCR1	ASB7	ARF4	ANK1	ALDH3A1	ANKRD54	ADRA1B	CDKN2B	ATF7IP	APOL7D	ABTB1	ADAM1A
AP4S1	ACER2	ACO2	BCL2A1A	CBR3	AKAP2	ATP5J	ATL2	ATP5H	CAPSL	CCNI	ATG5	ARF6	ANKRD6	ALDH7A1	ANTXR1	AES	CIZ1	ATG12	ARID2	ACAP1	ADAT1
APH1A	ACKR3	ACOT7	BCL2A1B	CCDC57	AKAP8	ATP5MD	ATP6AP2	ATP5J2	CASC1	CCNT1	ATP10A	ARFGAP2	ANO1	ALS2CL	AQP5	AI987944	CMPK2	ATRN	ARID3B	ACAP3	ADCK5
APOC1	ACOT1	ACSBG1	BCL2L15	CCDC60	AKR1B8	ATP6V1H	ATRNL1	BC051142	CCDC113	CDC123	ATP2C1	ARHGAP1	ANXA5	ANGPTL2	ARFGAP1	AIF1L	CMTR1	ATRX	ARIH1	ACAT3	ADGRV1
APOPT1	ACOT2	ACSL6	BHLHA15	CCER2	ALDH1L2	AUH	AVIL	BCL7B	CCDC121	CDHR4	BC005537	ARHGAP26	ANXA6	ANKS3	ARFGAP3	AKAP8L	COX18	BCL6B	ASXL1	ACD	ADI1
AQP2	ACOT6	ACSS2	BIN3	CHURC1	ALOXE3	BC003965	AW554918	BCL7C	CCDC130	CLCC1	BC064078	ARHGAP33	ARFIP2	ANXA8	ARMC9	AKR7A5	CTBS	BICRAL	ASXL2	ACE	ADRA2A
ARFRP1	ACOX1	ACTL6B	BST1	CIAO2B	AMFR	BEX2	BAIAP2L2	BECN1	CCDC146	CLDN5	BIRC6	ARID5A	ARHGEF28	AOC3	ARPP21	ALDH4A1	CTSO	BMT2	ATAD2B	ACIN1	AGGF1
ARL1	ACP7	ACTR3B	C5AR1	CLCNKA	AMMECR1L	BHLHB9	BC025920	C1QTNF9	CCDC153	CLPTM1L	BRCC3	ARIH2	ASCL3	AOX3	AS3MT	ALDH6A1	CXCL10	BRAF	ATE1	ACKR4	AGPAT1
ARPC5L	ACSS3	ADAMTS20	C5AR2	CLPP	AMOTL1	BPIFB1	BCL7A	CACNA1S	CCDC187	CLPX	BTG1	ARNTL	ATXN1	ARHGEF40	ASCC1	ALDOA	CYP4F16	BTBD10	ATF6	ACMSD	AHSA1
ATAD3AOS	ACTR1A	ADAMTSL1	CCDC14	COL16A1	ANGPT2	BPNT1	BORCS8	CACNB1	CCDC33	COX11	BZW1	ARRDC4	AU021092	ARL16	ASGR1	ALKBH6	D11WSU47E	BTF3L4	ATL3	ACPP	AHSA2
ATF7	ACTR1B	ADAMTSL5	CCL9	COLCA2	ANKFN1	CALM3	CACNA1C	CACNG1	CCDC78	CXCL13	C1GALT1C1	ATXN2L	B3GNT7	ARSA	ASPN	ALKBH7	DAXX	CAB39	ATM	ACSL1	AIFM1
ATG101	ACVR1B	ADGRA3	CCN5	COMMD4	ANKHD1	CAML	CACNA1H	CAMK2A	CCDC81	CYREN	CANX	ATXN7	BIN1	ASB13	ATG10	ANKRD42	DCLRE1A	CACUL1	ATP11C	ACSL5	AIP
ATP1B3	ACVR2A	ADGRB1	CCNL1	COPE	ANKRD17	CAR8	CALCR	CASQ1	CDCP2	DBR1	CAPRIN1	AZI2	BLOC1S5	ASL	ATP13A5	ANKZF1	DDX20	CBLL1	ATXN3	ACSS1	AKIP1
ATP5D	ACVR2B	ADGRB2	CCNO	COQ8B	ANKRD2	CARNS1	CASP12	CASQ2	CDH26	DCDC2B	CAPZA2	B3GNT3	BMP6	ASRGL1	ATP1B2	ANXA9	DDX56	CCDC127	B4GALT6	ACTB	AKR1B10
ATP5E	ACY1	ADGRB3	CCR1	COX19	ANKRD52	CCDC126	CASP9	CAVIN4	CDHR3	DDX52	CBX3	B4GALT5	BMP8A	B4GALT4	ATP2C2	AP3M2	DDX58	CCDC15	BACH2	ACTG1	AKR1E1
ATP5F1	ADAM22	ADGRL3	CCRL2	CPSF1	ANO6	CCDC13	CATSPERG1	CCDC40	CDK11B	DHX34	CCT8	BACH1	BMPR1B	B9D1	AURKAIP1	AP5S1	DDX60	CCDC50	BAZ1B	ACTL6A	ALG6
ATP5G2	ADAM23	ADIG	CCZ1	CRADD	ANXA7	CCK	CBFB	CDC42EP5	CDK9	DMKN	CDC42SE2	BAZ2A	BPIFA1	BBS5	AVEN	APRT-PS	DHX58	CCDC88A	BCL2L13	ACTR3	ALKBH2
ATP5G3	ADAM9	ADO	CD244A	CRNDE	AP2B1	CCS	CCDC117	CDNF	CFAP126	DPM1	CELF1	BC048403	BTC	BC024063	B3GLCT	ARHGEF25	DNAH11	CCDC93	BDP1	ADA	AMACR
ATP5K	ADAMTS1	ADPRHL1	CD300LF	CTSD	AP3D1	CDADC1	CCDC68	CENPX	CFAP206	DQX1	CELF2	BCL3	CACHD1	BC034090	B3GNT9	ARL2	DTX3L	CDK7	BRWD3	ADAM10	AMDHD2
ATP5L	ADAMTS15	ADRA1D	CD33	DCAF11	AQP3	CDK19OS	CCNJL	CHRNE	CFAP43	EIF3F	CLN3	BCLAF1	CACNA2D1	BC037704	B4GALT2	ARL6	EIF2AK2	CEP85L	BTAF1	ADAM17	AMTN
ATP5O	ADAMTS4	ADRB1	CD93	DCTN2	ARC	CEP112	CCNY	CKM	CFAP45	EPB41L4AOS	CMPK1	BCOR	CALML3	BHLHE41	BC017158	ASB8	ELK3	CEP97	CALCRL	ADAM19	AMZ1
ATP6AP1	ADAMTSL4	AFAP1	CDK2AP2	DHRS3	ARF2	CERS5	CD200	CKMT2	CFAP46	FABP4	CMTM6	BIRC3	CCDC112	BOD1L	BC055402	ASNA1	ERCC3	CGGBP1	CAPN7	ADAMTS14	ANGPTL6
ATP6V0B	ADARB1	AFAP1L1	CEP44	DMAP1	ARFGEF1	CGRRF1	CD2BP2	CLPB	CFAP65	FBXL6	CMTR2	BNIP2	CCDC155	BTD	BCAS3	ATAT1	EXOSC10	CHAMP1	CASP8AP2	ADCY7	ANKMY1
ATP6V1C1	ADCY1	AFF3	CFP	DPM2	ARHGAP28	CHCHD10	CD320	CMYA5	CFAP69	FOXC1	COMMD7	BRAT1	CCDC170	BVES	BCL2	ATP13A2	FBXW17	CHM	CBL	ADD1	ANKMY2
ATP6V1E1	ADCY2	AGBL3	CHIL3	DXO	ARHGAP8	CHMP3	CDIPT	COL20A1	CFAP70	GBA	COMMD8	BRD3	CCDC194	CACNA1G	BCORL1	ATP5A1	FLOT1	CHML	CBX5	ADD2	ANKRD10
ATP6V1G1	ADCY6	AGBL4	CLEC4D	EGFL7	ARHGEF18	CHP2	CDK5RAP1	COQ8A	CFAP77	GNAQ	COPB1	BRD8	CCDC3	CAND2	BFSP1	ATP5C1	GBP10	CHP1	CCNG2	ADGRE1	ANKRD27
ATXN10	ADCY9	AHCYL1	CLEC4E	EHMT2	ARHGEF26	CHRNA4	CDKN2AIP	COX6A2	CHST5	GNB2	COPG2	BRPF1	CCL11	CAP2	BGLAP	ATP5MPL	GBP2	CISD2	CCNT2	ADGRE4	ANPEP
ATXN7L3B	ADGRA2	AI593442	CLEC4N	EPN1	ARID1A	CIB2	CEP164	CSNK1G2	CIB3	GNPDA1	COPS7B	BTBD17	CD276	CAPN6	BGLAP2	ATP6V0C	GBP3	CNOT4	CDAN1	ADGRE5	ANXA4
B3GNT2	ADGRG2	AI597479	CLN6	ERAL1	ARID1B	CLDN19	CFAP157	CSRP3	CLCN7	GOLT1B	CPSF2	BTG2	CD63	CAR5B	BGN	ATP6V0D1	GBP4	CNOT7	CDC27	ADGRG1	AP5Z1
BAD	ADGRL1	AI854703	CLN8	FAAP20	ARID5B	CLEC3A	CFAP61	CYB5R2	CMTM8	GON7	CRNKL1	CABIN1	CDH10	CATIP	BMP3	ATP6V1C2	GBP5	CPD	CDC40	ADGRG3	AQP4
BAG1	ADGRL4	AJAP1	CNPPD1	FAM131C	ARL4C	CNIH1	CGREF1	CYP27A1	CXCL14	GORASP2	CYSLTR1	CAPG	CDH6	CAVIN3	BMP5	ATP6V1D	GBP6	CRK	CDC73	ADIPOQ	AR
BCAP29	ADHFE1	AK1	CNTRL	FANCE	ARNT	COMMD9	CHRNA1OS	DES	CYP2B10	GPN2	DACH1	CAPN5	CDKL5	CBARP	BMPER	ATRAID	GBP7	CSNK1A1	CEBPG	ADIPOR1	ARFIP1
BCAP31	ADIPOR2	AKAP6	CORO1C	FBXO6	ARPP19	COX16	CIAO1	DHPS	CYP2G1	GPN3	DERL3	CAST	CHAD	CBX8	BOLA3	B3GALNT1	GBP9	CUL4B	CECR2	ADORA2A	ARHGAP10
BCAS2	ADM	AKTIP	CR1L	FKBP8	ARTN	COX4I2	CLCN3	DHRS7C	DANCR	GPNMB	DNAJA1	CBLB	CLDN34C1	CC2D1A	BTBD11	B3GAT3	H2-T22	CUL5	CEP170	ADORA2B	ARHGEF6
BET1	ADORA1	ALDH1A3	CRLF2	FKBPL	ARV1	CPA6	CLK1	DNAIC1	DNAAF3	GRINA	DOCK10	CCAR1	CLK4	CC2D2A	C1QTNF2	BACE2	H2-T23	CYFIP2	CEP350	ADPGK	ARID4A
BLOC1S1	ADPRHL2	ALDH5A1	CRTAM	GGA1	ASH1L	CRABP1	CNTD1	DNAJB4	DNAH10	GZMM	DPAGT1	CCDC82	CLTRN	CCDC102A	CACNA2D4	BBS2	H2-T-PS	CYLD	CEP68	ADRB2	ARL10
BLOC1S4	ADPRM	ALDOC	CSF2RB	GHDC	ATF3	CRIPT	COL6A1	DNAJC1	DNAH3	HERPUD2	DPY30	CCDC86	COL14A1	CCDC103	CADM1	BC005624	HAP1	DCAF17	CHD1	ADSL	ARMC1
BNIP1	AEBP1	ALG11	CSF2RB2	GINM1	ATF5	CYP2J9	COL6A3	DRG2	DNAH5	HNRNPLL	DR1	CCDC97	COL8A1	CCDC137	CADPS2	BC029722	HELZ2	DCP2	CKAP5	AFMID	ARMCX6
BOLA2	AEN	ALG2	CTSA	GPC4	ATG16L1	CYP39A1	COL7A1	DUS4L	DNAH6	HOPX	DSTN	CCL2	COLEC12	CCDC151	CALN1	BC031181	HERC6	DDX17	CNOT1	AGAP2	ARSI
BRI3	AFAP1L2	ALPK2	CTSK	GPX4	ATG2A	CYTL1	COPS5	ELOF1	DNAH9	HP1BP3	ELMO2	CCL7	CPED1	CCDC159	CAMKMT	BCAS3OS1	HNRNPR	DDX3X	CNOT2	AGK	ARSK
BRI3BP	AFDN	AMER2	CTSZ	GRPEL1	ATG4B	DACT3	COX10	ENO3	DNAIC2	HSD11B1	EMB	CD28	CPLX2	CD151	CARMIL2	BCAT2	IFI35	DDX6	CNOT6	AGPAT2	ASB2
BSND	AFF4	AMIGO1	CXCR2	GTPBP6	ATP13A1	DCUN1D2	COX6B2	ERICH2	DNALI1	HTATIP2	ENTPD5	CDK12	CSPG4	CD248	CCDC171	BCKDHA	IFI44	DENND6A	CNOT6L	AGPAT4	ASH2L
C1D	AGAP3	AMIGO2	DAZAP1	HAX1	ATP13A4	DDC	CR974586.4	FAM104A	DRC1	IGBP1	ETAA1	CDYL2	CSRP2	CD99L2	CCDC24	BCKDHB	IFIH1	DFFB	CPEB4	AGPAT5	ATAD3A
C4A	AGER	AMIGO3	DAZAP2	HDDC2	ATP2B1	DEAF1	CTC1	FAM240B	DRC3	ILF2	EXOC2	CEBPD	CYP2F2	CDH23	CCDC80	BDH2	IFIT1	DHX36	CPLANE2	AGPS	ATG16L2
CAAA01118383.1	AGFG2	AMN1	DCSTAMP	HMG20B	ATP6V0A2	DHRS13OS	CUEDC2	FEM1A	DRC7	INSL3	EXOSC3	CELSR1	CYP4A12A	CERS4	CCDC91	BEX3	IFIT2	DHX40	CPNE3	AGTR1A	ATG2B
CABP2	AGO3	AMPH	DDIAS	HMOX2	ATP7A	DIPK2A	CWC27	FHL1	DYNLRB2	IST1	FAM72A	CFLAR	CYP4A12B	CFAP52	CCDC92B	BHMT	IFIT3	DPY19L4	CREB1	AHCTF1	ATG4C
CBWD1	AGPAT3	AMT	DDX39B	HSD17B10	ATP8B1	DKK2	CYB5R1	FITM1	E4F1	JDP2	FBXL14	CHD7	CYP51	CFAP97	CCL21A	BHMT2	IFIT3B	DUSP11	CSNK2A1	AHCY	ATP23
CC2D1B	AGRN	ANK2	DGAT1	HYPK	ATP9B	DLK1	D17H6S53E	FMO1	EFCAB1	KARS	FGFR1OP	CHERP	DAPK3	CHD3	CCN4	BIK	IFITM3	DYTN	CSTF2	AI467606	ATP6V0A4
CCDC122	AGT	ANK3	DGAT2	IHH	ATPAF2	DNAJC5B	DCAF4	GCHFR	EFCAB6	KCTD18	FGL2	CHFR	DCN	CILP	CCNDBP1	BLOC1S3	IGHV2-2	ECPAS	D10WSU102E	AI504432	ATPSCKMT
CCDC124	AGTRAP	ANKDD1B	DHRS9	ITPA	AU022252	DNASE1	DDX41	GHRL	ELFN1	KCTD5	FOXRED1	CHIC2	DDR2	CILP2	CCSER1	BORCS5	IGTP	EEA1	D16ERTD472E	AI506816	B3GALT6
CCDC152	AHDC1	ANKRD12	DIAPH1	KAT14	AXIN1	DPT	DDX50	GPANK1	ELK4	KIN	FUCA2	CHMP2A	DDX1	CLIC3	CD209F	BORCS7	IIGP1	EFCAB14	DCAF7	AI662270	B4GALT7
CCDC32	AHNAK2	ANKRD13D	DPY19L1	KDELR1	B4GALNT3	EDN3	DDX59	GSTP2	ENKUR	KLHDC1	GATM	CHMP4B	DESI1	CLIC5	CD59B	BRAP	IL18BP	EGR2	DCLRE1C	AI839979	BABAM1
CCDC61	AI413582	ANKRD24	DTX4	KNOP1	BAG2	EFCAB10	DEPDC5	H19	ENO1B	KLHL5	GCA	CMIP	DLX3	CLUH	CDH11	BRF2	ING5	EIF2AK3	DCUN1D1	AIDA	BAIAP3
CCDC66	AI429214	ANKRD29	DUS1L	LAMP1	BAIAP2L1	EGLN1	DHH	HDHD5	ENO4	KYAT3	GDPD3	CNOT3	DLX6	CNMD	CDH13	BSCL2	IRF7	ELMO1	DDX42	AIF1	BBS10
CCDC73	AI463170	ANKRD34A	EBNA1BP2	LIPT1	BAMBI	EMC3	DIEXF	HJV	ESPNL	LARS	GGA3	CPSF7	DLX6OS1	CNTNAP4	CDKL1	C1QTNF4	IRF9	ELMOD2	DDX46	AIM2	BBS12
CCNC	AI480526	ANKRD34B	EIF4ENIF1	MAN2C1	BAZ2B	EMC4	DIO3	HMCES	ESYT3	LRIF1	GLT1D1	CRAMP1L	DNAJA4	COA7	CERCAM	C1QTNF5	IRGM1	ELOVL7	DENND1B	AIMP1	BCCIP
CCNQ	AI661453	ANKRD34C	EMG1	MCRIP1	BC021767	EMC9	DKKL1	HRAS	EYA2	LRRC47	GNG10	CRYBG1	DNAJB2	COL26A1	CFAP161	C2CD4D	IRGM2	ERCC6	DENND4B	AIMP2	BCKDK
CDK2AP1	AIFM2	ANKRD45	ENTPD7	MCRS1	BCAR1	EME2	DLEC1	HRC	FAM167A	LUC7L	GRIPAP1	CSNK2A2	DOCK4	COL4A5	CHCHD3	CAB39L	ISG15	ERLIN2	DGKH	AK2	BCL2L12
CENPV	AIRN	ANKRD46	ESYT1	METAP1D	BCAR3	EPM2A	DNAJA2	HSPB3	FAM183B	LY96	HNRNPUL2	CSTB	DPY19L3	COL9A1	CHCHD6	CAMK1G	KLHL36	ERMP1	DHX15	AK4	BCS1L
CEP19	AJUBA	ANKRD55	F13A1	MFGE8	BEND3	FAM118B	DNAJC21	HSPB6	FAM216B	MCUB	HPRT	CTDP1	DPYSL3	COPS2	CHST10	CANT1	KRT80	FAM102B	DHX9	AK6	BEX1
CEP63	AKAIN1	ANKS1B	FAM110A	MRGBP	BEND5	FAM178B	DOHH	HSPB7	FAM47E	MED4	HPS3	CTLA2A	DUSP7	COPS7A	CLDN10	CAR12	LGALS3BP	FAM120C	DIS3	AKNA	BLVRA
CFDP1	AKAP1	ANKS6	FAM160A2	MRPL10	BHLHE40	FAM184B	DPP10	IDH3G	FAM81B	MID1	HSPD1	CTPS	DYNC2H1	COQ5	CLEC11A	CASP6	LY6E	FAM126B	DMTF1	AKR1B3	BMS1
CHCHD1	AKAP11	ANO3	FBXL8	MRPL38	BICC1	FAM189B	EFCAB9	IGHV2-3	FANK1	MIIP	IFI27L2A	CTSB	EBF4	CPTP	CLEC14A	CBR1	MITD1	FAM13B	DNAJC14	AKR1C13	BMYC
CHCHD2	AKAP12	ANO4	FCGR3	MRPL43	BICDL2	FAM234B	EIF1	IGKV6-20	FBXL12	MLANA	IGHV1-66	CWC22	EFHD1OS	CRTC1	CLEC1A	CBR2	MLKL	FAM210A	DNMT3A	ALAD	BOLA1
CHCHD5	AKT3	ANO8	FCGR4	MRPS34	BICRA	FAM45A	EIF1AX	IMMT	FLAD1	MRPS23	IGKV12-41	CXCL16	EIF2B4	CSPG5	CLSTN2	CBR4	MOV10	FAM91A1	E2F3	ALDH16A1	BPHL
CHMP1B	ALDH1A1	AOPEP	FOLR2	MYDGF	BPTF	FAM71E1	EIF2B2	ITGB1BP2	FMO3	MSANTD3	IGKV4-68	DCAF15	ELOVL6	CTNNB1	CMBL	CCDC107	MRPL57	FBXO34	EIF3A	ALDH18A1	BRIP1OS
CHMP5	ALDH1L1	AOX1	FRRS1	NABP2	BRD2	FBXL15	EIF4EBP3	JPH1	FNDC7	MSL1	IMPA1	DCP1A	ELP5	CXXC1	CMC2	CCDC160	MX1	FEM1C	EIF5	ALDH1A2	BSG
CIR1	ALDH3A2	AP3B2	G6PDX	NARFL	BRD4	FBXL17	EIF5B	JPH2	FOXA1	MTX2	IMPA2	DDX54	EMCN	CYBRD1	CMSS1	CCDC17	MX2	FGD4	ELOA	ALDH1A7	C1QL1
CLTA	ALG1	AP3S2	GALNT6	NEK8	BRIX1	FBXL22	EML3	JSRP1	FOXS1	MUC4	IRF2BP2	DENND3	ENTPD3	CYP4B1	CNTN4	CCDC173	NAMPT	FUBP3	ENPP4	ALDH2	C2CD3
CLUAP1	ALG10B	APBA1	GDPD2	NMT1	BRWD1	FBXO2	ENO1	KCNC4	GLB1L2	MUTYH	JRKL	DHX38	EPB41L2	CYS1	COL11A1	CCDC181	NMI	GAS2L3	EP400	ALDH3B1	C2CD5
CMC1	ALKBH3	APBA2	GGT1	NOP53	BSPRY	FBXO22	EPS8L1	KCNG4	GPX4-PS2	NEU1	KATNBL1	DHX8	EPB41L4B	CYTH3	COL11A2	CCDC189	NUPL2	GAS7	EPRS	ALDH3B2	C8G
CMC4	ALKBH5	APBB1	GGT5	NOSIP	BTBD7	FBXO3	EVI5	KIRREL3	GRAMD1A	NFKBIL1	KBTBD7	DNAJB13	EPHA3	DAAM2	COL13A1	CCDC28A	OAS1A	GCC1	EPS15	ALDOB	CABCOCO1
CNBP	ALOX12E	APBB2	GLB1	NSFL1C	C1QTNF1	FCGBP	EXOC6B	KLHL30	HDAC7	NMB	KCNJ2	DNAJC25	EPHB2	DALRD3	COL15A1	CCDC28B	OAS1B	GLCCI1	ERO1L	ALG3	CALHM2
CNEP1R1	AMBRA1	APC2	GLTP	NSRP1	C2CD2	FCHSD2	FAM117B	KLHL33	HHLA1	NOD2	KDELR2	DNTTIP2	ERC1	DAND5	COL1A1	CCDC30	OAS1C	GLS	EXOC5	ALG8	CALM1
COA3	AMER1	APH1B	GNGT2	NUDT18	C2CD4B	FKBP1B	FAM122A	KLHL40	HNRNPL	NRDE2	KPNA3	DOT1L	ERCC1	DCAKD	COL1A2	CCDC84	OAS1G	GMFB	EYA3	ALG9	CAMK1
COMMD1	AMER3	APLN	GNPAT	OS9	CADM4	FKBP3	FAM228B	KLHL41	HOTAIRM1	NSMAF	KRCC1	DPP9	EVA1B	DDIT4L	COL22A1	CCDC9	OASL1	GOLPH3	FAM160B1	ALKBH1	CAPN1
COPS8	AMOT	APLP1	GOSR2	OST4	CALU	FKRP	FAM89A	KY	HPN	NSMCE4A	LHFPL2	DUSP10	FAM84A	DEGS2	COL23A1	CCL27A	OASL2	GOSR1	FAM76B	ALKBH4	CAPN10
COPS9	AMOTL2	APPL2	GPI1	P2RX5	CAMK2D	FNTA	FBXL7	LDB3	HSF1	NUP214	LNPK	DUSP4	FARP2	DGKQ	COL24A1	CD81	OGFR	GPALPP1	FANCM	ALOX12	CAR3
COQ2	AMY1	ARAF	GPR137B	PARVA	CAND1	FRYL	FGF13	LENG1	HYDIN	NUPR1L	LRMDA	DYRK1A	FBXL12OS	DHDH	COL25A1	CDK5	OXSM	GPATCH2L	FAR1	ALOX15	CAR4
COQ7	AMZ2	ARHGAP20	GPR68	PHF1	CAPNS1	FXYD1	FGGY	LMOD2	IGHV3-5	OFD1	LSM14A	EAF1	FDFT1	DIABLO	COL2A1	CEBPZOS	P2RX4	GPD2	FBXO42	ALOX5	CARS2
COX15	ANAPC16	ARHGAP24	GRK3	POLR2F	CARD6	FXYD6	FIZ1	LRRC39	IGHV8-5	OGFOD2	LYPLA1	EED	FGFR2	DMD	COL3A1	CEP131	P2RX7	GPR52	FMR1	ALOX5AP	CAVIN2
COX17	ANAPC2	ARHGAP42	GRN	PRADC1	CARM1	GAL3ST1	FMNL2	LSM7	INF2	OSGEPL1	MARCKS	EFHD2	FZD5	DNAAF4	COL5A2	CERS2	PARP10	GPRIN3	G2E3	ALPK1	CBY1
COX5A	ANG	ARHGAP44	GSR	PRKCSH	CASK	GAS2	FOXN3	LSMEM1	ING1	OXA1L	MBOAT7	EIF1A	FZD8	DNAJA3	COMP	CFAP20	PARP11	GRK5	GABPA	ALYREF	CCDC106
COX5B	ANGEL1	ARHGDIG	GTF2IRD2	PRR15L	CBX4	GH	FST	LY6G6D	INO80B	PAFAH2	MED20	EIF2B1	GABRP	DNAJC28	COQ4	CFAP298	PARP12	GTPBP10	GABPB2	ALYREF2	CCDC142OS
COX6B1	ANGPTL4	ARHGEF4	GTPBP1	PRR3	CCDC120	GHR	FUT8	MAPKAPK5	IQCA	PARP4	MED21	EIF4A-PS4	GALNT5	DUSP18	CPQ	CFAP299	PARP14	GUCY2F	GAPVD1	AMMECR1	CCDC148
COX6C	ANGPTL7	ARHGEF9	GTSE1	PSMC1	CCDC190	GLMP	FXYD2	MB	IQCD	PEX11B	METTL14	EIF4B	GGCT	DVL2	CPXM1	CFAP36	PARP9	GUF1	GDPGP1	ANAPC5	CCDC163
COX7A2	ANK	ARL14EP	GUSB	PSMC4	CCDC6	GLRB	GATAD1	MBD3	KCNRG	PEX12	MFSD1	EIF4E	GIGYF2	DYNC2LI1	CPZ	CHCHD7	PHF11D	HELZ	GFPT1	ANGPT1	CCDC166
COX7A2L	ANKRD13B	ARL8B	GYG	PSMD4	CCDC71	GPM6A	GDF9	MCRIP2	KDR	PGAM1	MFSD13A	EIF4H	GIPC2	DYRK1B	CRABP2	CHPT1	PLRG1	HERC2	GIT2	ANGPT4	CCDC167
COX7B	ANKRD13C	ARMC2	H2-K1	PSMD7	CCN1	GPR180	GPATCH11	METTL11B	KXD1	PHKG2	MGAT2	EIF6	GJB1	E2F6	CRISPLD1	CISD1	PML	HIF1A	GK	ANKFY1	CCDC191
COX7C	ANKRD16	ARMCX1	H2-Q10	PTTG1	CCNK	GPR88	GPN1	MLF1	LDLRAD1	PISD	MIR142HG	ELF2	GM527	EBF2	CRPPA	CISD3	PNPT1	HIST1H4D	GNAI3	ANKLE1	CCDC43
COX8A	ANKRD39	ARMCX2	HAUS5	PUF60	CD163	GPX6	GPR108	MUSTN1	LHX3	PMAIP1	MRPL32	ELL2	GNB4	EFCC1	CST3	CLDN11	PPIL2	HOOK1	GNPTAB	ANKRD13A	CCDC47
CRCP	ANKRD40	ARMCX3	HNRNPM	RAB1B	CD9	GRCC10	GSTA1	MYBPC2	LIAS	PNN	MRPS30	ELMSAN1	GPC1	EFNB1	CTNNA3	CLPTM1	PRDM9	HOOK3	GPBP1L1	ANKRD22	CCDC51
CRLS1	AOX4	ARMCX4	HOXB4	RAB4B	CDCP1	GSC	GTF3C5	MYH1	LIME1	POLD4	MSMP	ENTPD1	GPC3	EHF	CYP7B1	CNOT10	PSMA1	HS2ST1	GTF2H1	ANKRD44	CCDC62
CROT	AP1M2	ARMH1	HP	RDH5	CDH1	GSTA2	H13	MYH2	LOXHD1	POLE3	MTM1	EP300	GRB10	ELL3	DAPK2	COG1	PSME2	HSD17B7	HCFC2	ANKRD49	CCDC69
CRYGN	AP2A1	ARMH4	HPCAL1	REC8	CDK13	GSTA4	HIST1H2BG	MYH4	LRGUK	POLG	MTPN	EPC1	GXYLT2	EMP2	DCLK1	COG8	RBM28	HUWE1	HECTD4	ANLN	CCDC8
CRYZL2	AP2M1	ARNTL2	HPS1	RHOC	CDK18	GSTM5	HIST1H4N	MYHAS	LRP10	PPIG	MZT1	ERAP1	HHIP	ENDOV	DGKB	COL5A3	RIBC1	IDE	HERC1	ANP32B	CCDC90B
CUTA	AP4B1	ARPC1A	IFI207	RIPPLY3	CEMIP	GT(ROSA)26SOR	HK1OS	MYL1	LRRC28	PPP1CCB	NAA50	ERBIN	HMGCS1	ENPP2	DKK1	COL8A2	RNF213	IKZF4	HGF	ANP32E	CCNB2-PS
CUTAL	AP4M1	ARRDC2	IFI30	RPH3AL	CEMIP2	GUK1	HPS6	MYL2	LRRC34	PPT2	NCKAP5	ERCC8	HSPA13	EPHA7	DLX5	COMMD3	RTP4	IMPAD1	HJURP	ANTXR2	CCND1
CWC15	APBA3	ARXES2	IFNGR1	RRAS	CEP41	GULP1	HSP90AB1	MYL3	LRRC36	PRR7	NCL	ERGIC2	HSPA4L	EPHB4	DMRTC1A	COMMD6	SHISA5	INO80DOS	HMGCR	ANXA1	CCPG1OS
CYCS	APBB3	ASAP3	IGHG3	RRP1	CEP85	HACD3	HTRA3	MYLK2	LRRC3C	PSEN2	NFYB	ERN1	HSPG2	EPHB6	DNAJB3	COPS6	SKIV2L	IPO7	HNRNPU	AOAH	CCR10
CZIB	APC	ASIC1	IKBKB	RSPH3B	CFH	HACL1	IQCK	MYLK4	LRRC43	PSMA7	NIPA2	ESD	IDI1	EVPL	DNASE1L2	COQ3	SLC15A4	IPO9	HUS1	AP1B1	CD209A
D8ERTD738E	APCDD1	ASPH	IL17RA	RTCB	CFI	HAGHL	IQGAP2	MYLPF	LRRC46	PSMB1	NSUN3	ETF1	IGSF10	EXD2	DNHD1	COQ9	SLC31A2	IREB2	IL12RB2	AP1G2	CDC16
DAD1	APH1C	ASPHD1	IL1B	SAP25	CGNL1	HCFC1R1	JAG1	MYOM1	LRRC56	PSMB2	NTNG2	ETV6	IGSF3	EXOC7	DOCK1	COX14	SLFN9	ITPR1	ING3	AP2A2	CDC37
DAP3	APOD	ASPHD2	IL1R2	SBF1	CH25H	HDAC8	JAZF1	MYOM2	LRRC74B	PSMB3	NUCKS1	EXT2	IGSF5	FADS1	DOP1B	COX6A1	SMG8	KCNMA1	INO80D	AP2S1	CDC42EP2
DBI	APOLD1	ASTN1	IL1RN	SEC24D	CHAC1	HEXIM2	KCNQ1	MYOT	LYPLA2	PSMD13	OGFRL1	EZR	INMT	FADS2	DPYD	CPT1C	SNX1	KLHL20	INPP4A	AP3B1	CDPF1
DCTN3	APP	ASTN2	INTS14	SERHL	CHD6	HIGD1A	KLHL12	MYOZ1	MAATS1	PTRHD1	OSTF1	FAM120A	INTU	FADS3	DTD1	CRACR2B	SNX12	KLHL28	INTS2	AP3M1	CEBPZ
DCTN5	ARF3	ATAD1	INTS6L	SERPINB6A	CHD8	HMGCLL1	KRTCAP3	MYOZ2	MAK	RAB10OS	PAN3	FAM192A	ITGA7	FAM120B	DTX1	CREB3L4	SOAT1	KMT5B	INTS6	AP5B1	CEP162
DCTN6	ARFGEF2	ATCAY	IPMK	SGTA	CHPF2	HMGN1	L3MBTL3	MYOZ3	MEIG1	RAB26OS	PDE12	FAM214B	KCNJ8	FAM13A	ECM2	CRELD1	STAT1	KPNA1	IQGAP1	APBB1IP	CEP290
DDX28	ARFGEF3	ATL1	ISG20L2	SLC39A7	CHRNA1	HNRNPH3	LAMTOR3	MYPN	MIA	RABGGTB	PDK3	FAS	KDELR3	FAM149B	EDA	CRIP3	STAT2	KRAS	ITCH	APEH	CEP70
DDX5	ARG2	ATP1A1	ITGAM	SLC48A1	CHRNB1	HPS5	LDAH	NDUFA1	MRPL23-PS1	RBM48	PHF2OS1	FBN1	KITL	FAM160A1	EDF1	CSAD	SYTL1	LACC1	ITPRIPL1	APEX1	CEP78
DDX55	ARHGAP12	ATP1A3	ITPRIP	SPSB2	CHST1	HSD17B12	LHX1OS	NDUFA3	MRPL37	RBMX2	PHF6	FGF7	KRT7	FAM161B	EEF1D	CSRP1	TAP2	LARP4	IVNS1ABP	APEX2	CEP83OS
DENR	ARHGAP21	ATP1B1	ITPRIPL2	SRA1	CHST11	HTRA1	LMAN1	NDUFB8	MRPS18B	RHOV	PHTF1OS	FILIP1L	LCAT	FAM171A1	EFEMP1	CSTF2T	TAPBP	LCA5	KCNA3	APIP	CEPT1
DERL1	ARHGAP27OS2	ATP6AP1L	ITSN2	SSBP4	CIDEA	IDH3B	LOXL2	NEB	MTX1	RNF113A2	PPM1D	FIP1L1	LDLR	FAM214A	EGFL8	CTDSP1	TAPBPL	LIG3	KDM5A	APLF	CETN2
DHRS1	ARHGAP29	ATP6V0E2	IZUMO1R	STAP2	CISH	IGFBP2	LRRC42	NEK11	MYBPC1	RNF167	PPP2CA	FLT4	LDLRAD4	FAM227A	EGFLAM	CTDSPL	TARS2	LIMCH1	KDM7A	APLNR	CETN4
DLD	ARHGAP31	ATP6V1B2	JAK3	STK33	CITED1	IL34	LY6G6E	NET1	MYL12B	RNF34	PPP2R3C	FNBP4	LHFP	FAM57A	ELP2	CTF1	TBL1XR1	LPGAT1	KLHL18	APOBEC1	CFD
DMAC1	ARHGAP32	ATP6V1G2	JAML	STX5A	CLCF1	ILVBL	MAN1B1	NEURL1A	MYO1H	RPAP2	PPP3R1	FNDC1	LMO7	FBF1	EMID1	CUL9	TEDC2	LRP6	KLHL23	APOBEC3	CHCHD4
DNAJB6	ARHGAP35	ATPAF1	KCNK12	SUGP1	CLCN5	ITFG1	MEA1	NEXN	MYO3B	RPL13A	PRDX5	FNDC3A	LRP4	FBXL19	EML6	CWF19L2	TGTP1	LRRC61	KMT2C	APOBR	CHDH
DNAJC15	ARHGAP39	ATXN2	KHSRP	TARBP2	CLDN23	ITGB1BP1	MED16	NPAS3	NAA80	RPS27L	PROM1	FNIP1	LSS	FBXO10	ENOX2	CXXC5	TLE6	MAN1A2	KPNA4	APOL11A	CHN1OS3
DNAJC17	ARHGAP5	AW495222	KLF2	TBCA	CLDN3	JAM3	MED17	NPY	NEK5	RPS3A1	RABIF	FOSL2	LTBP1	FDX1L	ENPEP	CYB5D2	TLR3	MANEA	LCORL	APOL11B	CHST14
DNAJC19	ARHGEF10	AW549877	KLHL2	TBRG1	CLDN4	KAZALD1	MEN1	NRAP	NEU3	RPS6-PS4	RAN	FRMD4B	LTBP4	FGFRL1	ENPP6	CYP2J6	TMEM138	MAP3K2	LINS1	APOL6	CHTF8
DNAJC3	ARHGEF10L	AZGP1	KNG2	TGFBR3L	CLDN6	KCNK2	MESD	OAZ1	NHLRC4	RRAGC	RAP2C	FTSJ3	MAG	FHAD1	EPHB1	CYP2U1	TMEM140	MARCH7	LNPEP	APOL8	CHTOP
DPH5	ARHGEF11	B3GALT2	KTI12	TMEM176A	CLDN7	KCNMB2	MIPOL1	OBSCN	NINJ1	RSRP1	RASSF4	GAB2	MAS1	FKBP9	EPS15L1	CYP3A13	TMEM253	MARF1	LNX2	APOOL	CITED4
DPM3	ARHGEF12	B3GALT5	LARP1	TMEM176B	CLDN9	KCNMB4OS1	MLLT10	PDE9A	NME5	RTEL1	RBM34	GABPB1	MBOAT2	FOXO4	FAM114A1	CYP46A1	TNFSF10	MBIP	LPIN2	AQP1	CLDN22
DPP4	ARHGEF15	B3GAT1	LASP1	TMEM259	CLDND1	KCNMB4OS2	MORN1	PDLIM3	NME9	RXRB	RMRP	GADD45A	MED9OS	FSCN1	FANCC	CYP4F13	TOR1AIP2	MBTPS2	LRP8	AQP9	CLEC3B
DUSP22	ARHGEF16	B4GAT1	LEPR	TMUB2	CLEC16A	KCNN2	MRM1	PELO	NOS2	SAFB	RNF130	GAK	MEPE	FUT10	FAP	CYP4F39	TOR1B	MED14	LRRC8C	AQR	CLN5
DYNLT1A	ARHGEF17	BAALC	LIPG	TOMM6	CLIC4	KL	MROH7	PERM1	NOSTRIN	SCAMP3	RNF138	GATAD2A	MEX3A	GATC	FARSB	DAPL1	TOR3A	MED23	LTN1	ARAP1	CLNS1A
DYNLT1B	ARHGEF19	BAG4	LPXN	TPRGL	CLU	KLHDC2	MRPL58	PFDN4	NOX3	SERTAD3	RPPH1	GCFC2	MEX3B	GBGT1	FAT3	DCAF12L1	TRDMT1	MFSD14A	LYSMD3	ARAP3	CMTM5
EBAG9	ARHGEF2	BAG5	LRCH4	TRAPPC4	CNIH4	KLHDC9	MSANTD1	PGAM2	NR2C2AP	SF3B5	RSBN1L	GCLC	MFHAS1	GDF11	FBLN2	DCLK3	TREX1	MGAT5	LYST	AREL1	CNNM2
ECH1	ARHGEF3	BBOF1	LRG1	TRMT1	CNKSR1	KLHL14	MSTO1	PHF23	NTN1	SHKBP1	RSL24D1	GCNT2	MKX	GDNF	FBLN7	DDAH2	TRIM12A	MPP5	MALT1	ARF5	CNOT8
EEF1AKMT2	ARHGEF37	BBOX1	LRRC25	TRNAU1AP	CNKSR3	KRT14	MT-CO3	PHKG1	NUTF2-PS1	SLC22A15	RSPRY1	GET4	MME	GID4	FBXO9	DDRGK1	TRIM12C	MSL3	MAP3K1	ARHGAP11A	CNPY2
EFHD1	ARHGEF38	BBS1	LRRC59	TSSC4	CNN1	KRT4	MTSS1L	PKDCC	OC90	SLC35B1	SAP30	GIMAP5	MOXD1	GIPC3	FCRLS	DDT	TRIM21	MTMR9	MAPK1	ARHGAP15	CNPY4
EID1	ARHGEF5	BBS4	LSM12	UBE2M	COBL	LAPTM4A	MYCBPAP	PKIA	ODF3B	SMNDC1	SCAMP2	GMEB1	MPP2	GLI1	FER	DECR2	TRIM25	MTUS1	MAPK1IP1L	ARHGAP17	CNST
EIF1B	ARHGEF7	BBS7	LSM3	UBL5	COBLL1	LCE6A	MYG1	PKIG	OFCC1	SNAPC4	SCP2	GMEB2	MPPED2	GLO1	FGF14	DELE1	TRIM30D	MUC15	MARS2	ARHGAP18	CNTROB
EIF3J1	ARID4B	BC024978	LSM5	UBXN11	COL12A1	LDHB	MYO7A	PLA2G12A	OIT1	SNHG12	SEC23IP	GNA13	MRPS11	GLRA3	FHIT	DGCR6	TRIM34A	MYNN	MBD4	ARHGAP19	COA6
ELP1	ARL13B	BC049352	MAFG	URAH	COL18A1	LENG9	NARS2	PLD3	OTOG	SNHG6	SEM1	GNG12	MSMO1	GNPNAT1	FHL2	DIPK1C	USP18	MYO5A	MBTD1	ARHGAP23	COG4
EMC2	ARL2BP	BCAN	MAN2B1	USP5	COL28A1	LPCAT4	NCOA5	POLR2C	PBLD2	SNRPC	SEPT7	GNL3	MUC16	GPS1	FMOD	DIS3L	UTP11	NAA30	MDC1	ARHGAP25	COG6
ENY2	ARL4D	BCAS1	MAPKAPK2	VPS52	COL4A1	LRRC1	NDUFB2	POLR2E	PCDH20	SNX11	SERP1	GNS	MYH11	GPX7	FOCAD	DKK3	VILL	NCBP3	MDM4	ARHGAP27OS3	COIL
ETAA1OS	ARL5A	BCAT1	MCL1	VPS53	COL4A2	LRRC26	NEK7	PPP1R14B	PDLIM7	SOX18	SH2D5	GOLGA5	MYO19	GRAMD1C	FOXP2	DLG3	VPS36	NSD1	MED12L	ARHGAP30	COL27A1
FAIM	ARL5B	BCHE	MCMBP	WASHC3	COL4A6	LRRC52	NFE2L2	PPP1R36	PIAS4	SP3OS	SLAIN2	GRAMD3	MYO1B	GRTP1	GABARAPL2	DMAC2L	XAF1	NUFIP2	MFAP3	ARHGAP4	COL9A3
FAM114A2	ARL6IP5	BCL2L2	MCTP2	WDR24	COQ10B	LRRK1	NIF3L1	PQBP1	PIFO	SPON1	SLC26A8	GRAMD4	MYO1D	GTF2I	GALNT18	DMPK	ZBP1	NWD1	MIER1	ARHGAP45	COMMD5
FAM133B	ARL8A	BDH1	MDFIC	WDR83OS	CPM	LRRTM4	NKAIN2	PRKAB2	PIGT	SSR3	SLC35C2	GXYLT1	N4BP3	HARBI1	GATB	DNAJC30	ZCCHC2	OGT	MIER3	ARHGAP6	COMT
FAM151B	ARMCX5	BEAN1	MED8	WFDC2	CPNE8	LYPLAL1	NKAP	PRKCA	PKN3	STARD7	SLF1	H6PD	NATD1	HARS2	GBE1	DNAJC4	ZFP995	OSBPL3	MOB1B	ARHGAP9	COMTD1
FAM204A	ARPIN	BEND4	MFSD10	XPO6	CPSF6	LYRM1	NOL12	PYGM	PPARGC1B	STK19	SMAP2	HACD2	NAV3	HDHD2	GDF10	DNAL4	ZUP1	PANK3	MOSPD2	ARHGDIA	COPS4
FAM217B	ARRDC3	BEND6	MGST1	YJU2	CRB3	LYRM9	NOL4	RABL2	PPP1R32	SUMO3	SMARCA5	HAVCR2	NDNF	HEATR5B	GEMIN7	DOLK	0610040B10RIK	PAQR3	MPHOSPH9	ARHGDIB	COPZ2
FAM219B	ART3	BHLHE22	MLEC	ZFP637	CREBBP	LYSMD1	NOXRED1	RETREG3	PPP1R9B	SYF2	SMC3	HCFC1	NDRG1	HEXDC	GFRA2	DRAP1	2810025M15RIK	PATL1	MPP7	ARHGEF1	COQ6
FAM32A	ART5	BIVM	MMD	ZFP653	CREM	MACROD2	NRG2	RIT1	PROSER2	SYS1	SMPDL3A	HECTD1	NFATC2	HFE	GGNBP1	DUSP28	4930512H18RIK	PBX1	MTF2	ARHGEF39	COX20
FAM89B	ARVCF	BMP4	MMP19	ZFP688	CRKL	MALAT1	NSUN6	RNF126	PRR29	SZT2	SMU1	HIPK1	NGEF	HGD	GJA1	EAPP	4930518I15RIK	PCDHB16	MTMR1	ARID3A	COX7A1
FAM98A	ASAH2	BMPR1A	MMP8	ZFP963	CRLF1	MAP2K6	NUDT14	RPL28-PS1	PRXL2A	TAF1D	SNHG4	HMGA1	NIPAL1	HMCN1	GKN3	EBF3	4930522L14RIK	PCDHB19	MTMR3	ARL11	COX8B
FAM98C	ASAP2	BNC2	MMP9	ZFPL1	CRTC3	MATN1	NUDT6	RPL3L	PSMB4	TBC1D8	SNRNP48	HMGCL	NLRP5-PS	HTR1B	GNB1L	ECHDC3	4933439K11RIK	PCDHB2	MYADM	ARL4A	CPNE1
FANCF	ASCC2	BNIP3	MOCOS	0610012G03RIK	CSDC2	MEGF9	NUS1	RPUSD4	PYGO2	TCIRG1	SNRPF	HMGXB4	NPNT	IDUA	GNG8	ECHS1	A730011C13RIK	PCDHB4	MYPOPOS	ARL5C	CPT2
FASTKD3	ASIC3	BOD1	MPHOSPH10	1810010D01RIK	CSRNP1	MFF	P2RX3	RSPH1	QTRT1	TIMM44	SNX18	HYOU1	NPRL3	IFT122	GPC5	ECI1	A930002H24RIK	PCDHB9	N4BP2	ARL6IP6	CPXM2
FASTKD5	ASPG	BRD3OS	MS4A4D	2610528J11RIK	CST6	MIB1	PALM2	RSPH10B	RANBP3	TM7SF2	SRSF1	ICAM1	NRP1	IFT46	GPC6	ECSIT	A930037H05RIK	PCM1	NCOA4	ARMC7	CREBZF
FBXL5	ASTE1	BRDT	MS4A6D	9130401M01RIK	CTDSPL2	MIEF2	PARN	RYR1	RARRES2	TM9SF1	SRSF2	IER2	OLFML2A	IFT81	GPCPD1	EFHC1	B130046B21RIK	PDZD8	NEPRO	ARMC8	CROCC
FBXO33	ATG13	BRINP1	MSN	A230050P20RIK	CTNNA1	MOB4	PCP2	SAR1B	RBM25	TMBIM4	SSB	IER5	OLFML3	IFT88	GPR34	EFNA2	C330013E15RIK	PELI1	NETO2	ARMT1	CRTAP
FBXW2	ATG14	BRINP2	MST1R	C230096K16RIK	CTNNAL1	MPC2	PCSK5	SBK2	RCHY1	TMBIM6	STRAP	IFITM1	OLFR1033	IGDCC4	GRIA1	EGF	F830016B08RIK	PFKP	NFATC3	ARPC1B	CRYBA4
FDXR	ATG9A	BRMS1L	MTHFSL	D330041H03RIK	CTPS2	MROH1	PEX1	SCD4	RGS22	TMED2	SYPL	IFNLR1	P3H1	IGHMBP2	GUCY1A1	EID2B	GM10130	PIGO	NFYA	ARPC2	CRYL1
FIS1	ATMIN	BRSK1	MTMR12	GM10657	CTTNBP2NL	MSANTD4	PEX11G	SGCA	RPL10A-PS1	TMEM128	TAF1B	IFRD1	PAQR5	IL33	H2-Q1	EIF2B5	GM12500	POC5	NHSL2	ARPC3	CRYZ
FKBP2	ATN1	BRSK2	MYD88	GM12405	CUL3	MTFP1	PHF14	SGF29	RPL10-PS3	TMEM159	TAX1BP1	IL12RB1	PATJ	IMPACT	HAGH	ELAC1	GM14966	POLR3F	NIN	ARPC4	CRYZL1
FMC1	ATOH8	BSN	MYH9	GM13008	CWC25	MT-ND4	PHLDA2	SLC2A4	RPL14-PS1	TMEM243	TBC1D14	IL1RL2	PCDH18	INTS1	HAUS7	EMC10	GM15821	PPIP5K2	NMD3	ARPC5	CSTF3
FTH1	ATP11A	BTBD1	N4BP2L1	GM13778	CWF19L1	MYADML2	PHTF2	SLN	RPL37	TMSB15B2	TDP2	IL4RA	PDZD9	IQCE	HBA-A1	EMC6	GM16675	PPM1F	NOL8	ARRB1	CTHRC1
FUNDC1	ATP13A3	BTBD3	NAA40	GM15510	CXADR	MYCBP	PIGM	SMAGP	RPL37RT	TNNI3	TFAM	IL6RA	PGF	IRS3	HBA-A2	EMX2	GM16754	PPP4R2	NOS1AP	ARRB2	CTR9
FUS	ATP1A2	BTBD6	NAF1	GM26935	CXCL1	NBDY	PIGX	SMYD1	RPL9-PS6	TOMM40	THUMPD1	INO80	PIK3R1	ISYNA1	HBB-BS	ENHO	GM17195	PROX2	NOTCH2	ARSG	CTU1
G0S2	ATP2A2	C1QTNF7	NCLN	GM29257	CYB5R3	NCCRP1	PLPPR5	SNX22	RPS23-PS1	TPD52	TM6SF1	IRAK1	PKNOX2	ITFG2	HBB-BT	ENTPD2	GM26642	PRPF18	NRP2	ART4	CUL2
G6PC3	ATP2B2	C9ORF72	NFATC1	GM37144	CYTH1	NDP	PMPCB	SRL	RPS26-PS1	TRAPPC6A	TM7SF3	IRAK2	PLA2G5	JAM2	HDAC9	EPHX1	GM26797	PRPF39	NUP153	ASAH1	CYB561D2
GABARAP	ATP2B3	CABLES1	NIPSNAP3B	GM42715	DAPK1	NDUFA11	PNMA1	STAC3	RPS2-PS10	TRMT6	TM9SF3	IRAK3	PLOD2	JRK	HEPH	EPHX2	GM41231	PTEN	NUP155	ASAP1	CYB5A
GADD45GIP1	ATP6V0A1	CABP1	NLRX1	GM45105	DCAF1	NDUFA5	POLR2H	STARD10	RPS6KB2	TRNT1	TMEM165	IRF2	PLPP2	KANK2	HHAT	ERCC2	GM43196	PURB	NUP50	ASB1	CYB5RL
GAL3ST4	ATP6V1A	CABP7	NOP9	GM49207	DCHS1	NDUFA9	PPP1R11	STBD1	RSPH14	TSPOAP1	TMEM168	ITGA5	PLPP3	KANSL1L	HPCA	ERI3	GM4356	QK	ORAI2	ASB17OS	CYP11A1
GAPDH	ATP8A2	CACFD1	NSMCE2	GM8738	DCHS2	NDUFAB1	PRDM15	STPG1	RSPH4A	TUSC1	TMEM216	IWS1	PMPCA	KATNAL2	HPGD	ESF1	GM47248	RALGAPA1	ORC3	ASB3	CYP20A1
GAR1	ATP8B2	CACNA1B	NUCB1	H2-Q2	DDA1	NDUFAF5	PRPH	SYNPO2	SAP18B	UBB	TMEM219	JUNB	PMVK	KATNB1	HS6ST2	ETFRF1	GM47794	RAP1GAP2	OXSR1	ASCC3	CYP2E1
GARS	ATP9A	CACNA1D	NUDCD2		DDB1	NDUFAF6	PRR22	SYPL2	SART1	UBE2K	TMEM229B	JUNOS	PPEF1	KCNJ16	HSPH1	ETNK2	GM4841	RBM12B1	PAK2	ASF1A	D2HGDH
GAS5	ATRIP	CACNA2D2	OCSTAMP		DDIT3	NDUFB5	PVT1	TADA3	SAXO2	UBE2V1	TMEM38B	KANSL2	PPFIA2	KDM4B	IFITM5	ETNPPL	GM4951	RBM41	PCGF5	ASF1B	D3ERTD751E
GDAP2	ATXN1L	CACNA2D3	OLFML2B		DDR1	NDUFS1	RAB10	TBX15	SCEL	UCKL1	TRAM1	KAT7	PPM1E	KHDRBS3	IGF1	EVC	GM6548	RBPJ	PCYT1A	ASNSD1	DAGLB
GDI2	ATXN7L2	CACNB3	OSCAR		DDX19A	NDUFS5	RAB11A	TCAP	SEC14L3	UFSP1	TTC13	KCNF1	PPM1L	KIF13B	IGFBP5	EVC2	GM7160	RC3H1	PFKFB3	ASPM	DBP
GFER	ATXN7L3	CACNB4	OSTM1		DDX23	NELL2	RAB21	TCF15	SELENBP1	UIMC1	TTC32	KDM3B	PPP1R16B	KIF7	IGSF1	EXOSC4	GM9949	RELCH	PGAM5	ATAD2	DDB2
GGH	AU040320	CACNG2	PABPC1L		DEDD	NGRN	RABEPK	TFEB	SERPINB11	VAMP5	UBE2A	KLF10	PPP1R9A	LLGL1	IGSF8	F2R	AA413626	RELL1	PGGT1B	ATAD5	DDHD1
GLMN	AUTS2	CACNG4	PANK2		DENND4C	NKAIN4	RALA	THAP4	SERPING1	VHL	UCHL5	KLF3	PRDM11	LMLN	ILKAP	F8A	AW011738	RFX7	PHF12	ATF1	DDO
GLRX3	AV356131	CACNG5	PARP8		DEPP1	NPTN	RASAL1	TIE1	SH3GL1	VPS16	UGCG	KLF4	PRKD1	LMNTD2	IMMP1L	FADS6	BC023105	RLIM	PHF20L1	ATF4	DECR1
GMPPA	AVL9	CACNG7	PBX2		DESI2	NR2F6	RC3H2	TMEM182	SHANK3	XRCC1	USP14	KLF6	PRMT8	LMOD1	INSC	FAH		RN7SK	PHF8	ATG3	DEPDC7
GMPS	AVPI1	CACNG8	PCNT		DGKI	NR3C2	RCC1L	TMEM38A	SLC23A1	ZDHHC4	USP46OS2	KLF7	PRR18	LNX1	ISCA2	FAHD2A		RNF141	PHIP	ATG4A	DGKZ
GNG5	AXIN2	CADM2	PDE1B		DHX33	NREP	RDX	TMOD4	SLC7A6OS	ZFC3H1	UTP18	L3MBTL2	PRRX1	LRIG1	ISLR	FAM120AOS		RNF19A	PHLPP2	ATG4D	DGUOK
GPC2	AZIN2	CADPS	PGM2		DIDO1	NTAN1	RFLNB	TNNC2	SLITRK6	ZFP330	UTP6	LAMP2	PRRX2	LRRC3	ITGA9	FAM161A		RPS6KA3	PIKFYVE	ATG7	DHCR24
GPR27	B3GALT1	CALB1	PI15		DLG1	NTM	RNF180	TNNI2	SLTM	ZFP87	VAPA	LAP3	PRSS12	LRSAM1	ITGB5	FAM174A		RSBN1	PIP4K2B	ATIC	DHCR7
GPR83	B3GNT4	CALB2	PIK3R5		DLGAP4	NTRK3	ROBO2	TNNT1	SMARCB1	ZNHIT3	VPS26A	LARP4B	PTGES2	LTBP3	ITGBL1	FAM174B		RWDD4A	PMS2	ATOX1	DHODH
GTF2A1	B4GALNT4	CALD1	PIM1		DMP1	NTSR2	ROPN1L	TNNT3	SMG9	0610009E02RIK	WDFY2	LAYN	PTGIS	MACO1	ITM2A	FAM181B		SACM1L	PPHLN1	ATP10D	DHRS13
GTF2A2	BACE1	CALHM5	PINX1		DMXL1	NUDCD3	RPS13-PS4	TPM2	SNTN	0610030E20RIK	WDR3	LDLRAP1	PTPRD	MAGED2	ITPR2	FAM187B		SAMD5	PPP1R10	ATP11B	DHRS4
GTF2B	BAG3	CALM2	PITPNM1		DNAAF5	OCIAD1	RPS16-PS2	TRDN	SNX15	1110004F10RIK	WTAP	LIMD1	PTPRZ1	MALL	KCNAB1	FAM193B		SC5D	PPP1R12A	ATP2A3	DHRS7B
GTF2H5	BAG6	CALR3	PLAUR		DNAJC13	ODR4	RPS6KA2	TRIM54	SOD3	1110020A21RIK	XLR3B	LITAF	PWWP2B	MAMSTR	KCNE1	FAM234A		SCD1	PPP4R3B	ATP2B4	DHX16
H3F3B	BAHCC1	CALY	PLEKHM1		DNPEP	OGN	RRP8	TRIM72	SPAG16	1110025M09RIK	YME1L1	LONRF3	PXDN	MBTPS1	KCNMB4	FAM241B		SEC22C	PPP6C	ATP6V0E	DHX29
HAUS3	BAIAP2	CAMK2B	PLEKHO2		DPH3	OTOP1	RSPH3A	TRRAP	SPAG6L	1110035H17RIK	YWHAZ	LPAR2	RAI14	MCCC1	KCNT2	FAM3A		SEC63	PRKCZ2	ATP7B	DHX57
HCCS	BAP1	CAMK2G	PLPP5		DSG2	OTOS	RSRC1	TSKU	SPAG8	1600020E01RIK	ZBTB6	LRRC32	RANBP17	MDFI	KCTD12	FAM43A		SEMA3A	PRPF4	ATP8A1	DIMT1
HELQ	BARHL1	CAMK2N2	PQLC3		DSP	OTUD6B	SAFB2	TTN	SPATA18	2410006H16RIK	ZCCHC9	LSG1	RASGRP3	MEAK7	KCTD3	FAM53A		SEMA3E	PRPF4B	ATP8B4	DMC1
HHATL	BASP1	CAMKK1	PREB		DTX2	P2RX6	SAR1A	TXLNB	SPEF2	2510039O18RIK	ZFP120	LSM11	RASL11B	MELTF	KIF16B	FAM84B		SEPT11	PUM2	ATPIF1	DNAAF2
HIBADH	BAX	CAMTA1	PRKCD		DUSP1	PACRG	SCN7A	UBE2B	SSC4D	2700062C07RIK	ZFP35	LY6A	RCE1	METRN	KLHL4	FAM92A		SERINC5	PWWP2A	ATR	DNAH7A
HIGD2A	BBC3	CAPN2	PRKCH		DUSP14	PAIP1	SCN9A	UNC45B	STMND1	4732487G21RIK	ZFP644	LZIC	RGS12	METTL22	KLK6	FAT2		SFT2D2	RAD23B	ATXN7L1	DNAH7B
HINT1	BBX	CAPRIN2	PRR5L		DUSP5	PAIP2	SCO1	UQCRC1	TAOK2	4833438C02RIK	ZFP951	MAFB	RGS5	METTL26	LAMA2	FBLN1		SLC12A6	RANBP2	AU020206	DNAJC10
HIST1H2AE	BCL2L1	CAR10	PRSS16		DYNLT1C	PALM3	SELENOI	USP4	TAS1R1	4930581F22RIK	ZFP961	MAFK	RHBDL2	MILL2	LAMA3	FBP2		SLC15A5	RAPGEF6	AUNIP	DNAJC24
HIST1H2AP	BCL2L11	CAR11	PTGER4		DYRK2	PAM16	SF3A1	VMN1R-PS144	TBATA	4933408B17RIK	ZFP992	MAK16	RNASE1	MN1	LEF1	FBXO36		SLC25A32	RASA1	AURKA	DNASE1L1
HIST2H3C1	BCL2L14	CAR15	PTPN1		ECSCR	PAXX	SF3A2	XIRP2	TBKBP1	B230208H11RIK	ZMPSTE24	MAML1	RNF121	MPI	LGALS1	FDX1		SLC35A5	RASA2	AURKB	DNASE2A
HNRNPA0	BCL6	CAR7	RAC1		EDEM3	PCDHA4	SFRP4	YIF1B	TCP11	B230322F03RIK	ZNF41-PS	MAN2A1	RNF150	MPV17	LIFR	FGFBP3		SLC35B4	RBM12	AVPR2	DOLPP1
HNRNPH2	BCL9	CARD10	RALB		EEF1AKNMT	PCMTD1	SFTPD	YIPF7	TCTE1	D730003I15RIK	1600014C10RIK	MAP1S	RRP7A	MR1	LIPC	FIBP		SLC36A1	RBM26	AXL	DPH7
HOMEZ	BCL9L	CARD14	RASL11A		EFNA1	PCYOX1	SKOR2	ZFP652	TCTEX1D4	GM14276	1700007L15RIK	MAP2K3	RTN4RL1	MRC2	LIPO3	FKBP7		SLC38A6	RBM27	AY036118	DPP7
HS3ST6	BDNF	CASC4	RASSF2		EFNA3	PDE1C	SLC15A2	ZFP783	TEKT1	GM15429	1700123O20RIK	MAP3K14	S1PR3	MRGPRE	LMF1	FLYWCH2		SLC39A10	RCOR1	AZIN1	DRAXIN
HSPE1	BEGAIN	CASKIN1	RAVER1		EFNA5	PDHB	SLC27A4	ZFP979	TEKT4	GM16192	2810002D19RIK	MAP3K3	SEMA3D	MT-RNR1	LMNTD1	FOLH1		SLC39A9	REL	B2M	DRG1
ICA1	BEND7	CATSPER2	RBM3		EGFR	PDXP	SLC35A2	1700113A16RIK	TEX52	GM16740	4921524J17RIK	MAP3K8	SEMA5A	MYZAP	LONP2	FUCA1		SLC45A4	RGP1	B3GALNT2	DROSHA
ICE1	BEST1	CAV1	RBM39		EGR1	PEX13	SMG6	2310002L09RIK	TMEM190	GM17251	4930577N17RIK	MAP4K5	SENP6	NAA35	LPP	FUOM		SLC9A8	RIPK1	B3GALT4	DTWD2
ID2	BEST3	CAV2	RCCD1		EHD2	PEX14	SMPD4	4732471J01RIK	TMEM212	GM19705	4933424M12RIK	MAPK6	SEPT8	NEK4	LRBA	GALM		SLMAP	RNF20	B3GNT5	DUBR
IER3IP1	BFAR	CAVIN1	RDH12		EIF3C	PFKM	SMPDL3B	GM12319	TMEM232	GM20605	E230032D23RIK	MAPK7	SGCD	NEURL4	LRP2	GAS1		SLU7	RNMT	B3GNT8	DUS2
IFT20	BGLAP3	CBLN4	REEP4		EIF4G1	PFN4	SNX6	GM12788	TMEM238	GM26917	GM10052	MAT2A	SH3D19	NFIC	LRRC17	GATD3A		SMAD5	RPS6KB1	B3GNTL1	DUSP12
IFT27	BICD1	CBX6	RGCC		ELF3	PGK1	SPARC	GM12918	TMEM52	GM28050	GM15729	MCFD2	SLC22A23	NIPAL2	LRRC23	GCC2		SMG7	RPUSD2	B4GALNT1	DUSP19
IGFLR1	BICDL1	CCBE1	RGL2		ELL	PHAX	SPTLC1	GM15642	TMPRSS9	GM28229	GM16094	MED1	SLC25A53	NKD1	LUM	GCDH		SNX13	RREB1	B4GALT3	DUSP23
IMP3	BIRC2	CCDC157	RILPL2		EMP1	PHTF1	SRP54A	GM16161	TPT1-PS3	GM28809	GM17092	MED13L	SLC27A2	NMNAT1	LUZP2	GDF6		SORT1	RSF1	B9D2	DUSP3
INO80C	BLCAP	CCDC184	RNASET2A		EMSY	PI4KA	SRSF5	GM26718	TRAF4	GM29562	GM17509	MED26	SLC29A1	NMRK1	LYPD2	GGACT		SPAST	RUNX1	BABAM2	DZIP3
ITM2B	BLZF1	CCDC39	RNF144A		ENG	PIGG	STAG3	GM28042	TRIM26	GM38431	GM20319	METAP1	SLC37A3	NOTCH3	LYRM4	GJB2		SPOPL	RYBP	BAK1	ESRRB
JAGN1	BMF	CCDC65	RNPEP		ENPP1	PLA2G16	STARD6	GM28661	TRP53I11	GM4221	GM28043	METTL6	SLC38A11	NOXO1	LYZ1	GJB6		SRPK2	SASS6	BANF1	EBPL
JTB	BMI1	CCDC74A	RPF1		EPCAM	POLB	STX7	GM37829	TSEN54	GM42501	GM29542	MFSD4A	SLC6A9	NPHP1	MACROD1	GLT28D2		ST7L	SATB1	BANK1	ECD
KDELC1	BMP1	CCDC85A	RPL3-PS1		EPG5	POLN	SUOX	GM42857	TTC16	GM43461	GM32633	MINDY1	SLIT2	NPHP4	MAMDC2	GPR162		STK24	SCAF11	BARD1	ECHDC1
KISS1R	BMP7	CCDC85B	RPL7L1		EPHA2	POLR3H	SWT1	GM44148	TTC21A	GM44597	GM36958	MKLN1	SMTN	NPY1R	MAPKAP1	GPR37		STRN	SCYL2	BATF	EDNRA
KLHL9	BMPR2	CCDC85C	RPS27A		EPS8	POMC	SYNPR	GM44709	TTC25	GM44899	GM37903	MLXIP	SNED1	NRADD	MATN4	GPX8		STX6	SCYL3	BATF2	EEF1AKMT1
KRTCAP2	BNIPL	CCDC92	SART3		ERF	POU3F2	TAF11	GM45328	TTC29	GM45663	GM42659	MMP13	SNTB1	NT5C3B	MCM9	GRHPR		SYN3	SDAD1	BATF3	EEF2KMT
LAMTOR1	BOC	CCDC96	SCARF1		ERRFI1	PPA2	TBCEL	GM4544	TTC34	GM47920	GM48850	MMP3	SORCS1	NTF5	MEF2C	GRXCR1		TAF4B	SDE2	BAZ1A	EFEMP2
LAMTOR4	BORCS6	CD164	SDC1		ESAM	PPP1R3C	TCTEX1D1	GM47164	TTLL9	GM48079	GM49874	MOCS1	SPX	NUDT12	MEGF11	GSTK1		TBL1X	SEH1L	BBIP1	EGLN3
LAMTOR5	BRD1	CD164L2	SEC61A1		ETS2	PPP1R3E	TGM4	GM49980	UBTF	GM48838	GM8203	MON1B	SQLE	OBSL1	MEGF6	GSTM1		TET1	SF3B1	BBS9	EIF2D
LCMT1	BRINP3	CD46	SERINC3		EVA1A	PRAF2	THAP1	GM5532	UBXN10	GM9828	GM9888	MOSPD1	SRFBP1	OGG1	METRNL	GSTM6		THAP12	SLC35A3	BC028528	ELP3
LCTL	BROX	CD59A	SERPINA3B		EWSR1	PRCD	TMEM11	GM6030	USH1C	AC122861.4	AC109138.8	MS4A4A	SSX2IP	OLFML1	METTL8	GSTP1		TIPARP	SLC35E1	BC030867	ELP6
LEPROT	BTBD19	CDH18	SETDB2		EXPH5	PRKACB	TMEM161B	AC115631.1	VCAN	CAAA01147332.1		MS4A8A	SULF1	OLFR1385	MFAP2	GSTT1		TLR5	SLC4A7	BC035044	EML4
LEPROTL1	BTBD2	CDH19	SFPQ		F11R	PRKAG2	TMEM202		VPS72			MSR1	SULT1A1	OMD	MFAP4	GSTT2		TMEM163	SLC8A1	BC043934	ENKD1
LETMD1	BTBD8	CDH2	SH3BP2		F2RL1	PRKN	TMEM265		VWA3A			MSS51	SUSD5	OPN3	MFAP5	GSTT3		TMEM167B	SLF2	BC051226	ENOPH1
LIN37	BTBD9	CDH24	SH3TC1		F3	PRL	TOMT		WDR63			MTA3	TAGLN	OSBPL5	MICOS10	H1FX		TMEM41B	SLFN3	BC052040	ENTPD6
LMO4	BTG3	CDH4	SIGLEC15		FAF2	PTDSS1	TPMT		WDR66			MTCP1	TEK	OSR2	MICOS13	HADH		TMX4	SLK	BC055324	ENTPD8
LRRC8DOS	BVHT	CDH8	SINHCAF		FAM168B	PTGDS	TRARG1		WDR89			MTDH	THOC1	OXNAD1	MICU1	HADHB		TNKS2	SMAD2	BC147527	ERCC6L2
LSM6	C1QL3	CDH9	SIRPB1A		FAM180A	PTN	TRMT112-PS2		WDR90			MTF1	THRB	P3H4	MIPEP	HDAC3		TNPO1	SMARCAD1	BCL11A	ERGIC3
LTO1	C2CD2L	CDK14	SIRPB1B		FAM193A	PTOV1	TRMT5		WNT11			MVP	THRSP	PADI2	MLIP	HIC1		TOMM70A	SMARCC1	BCL2A1D	ETFA
LYRM2	C77080	CDK5R1	SIRPB1C		FAM49A	PTPMT1	TRPC3		WNT3			MYBBP1A	TIMM17A	PAK4	MLLT3	HIST1H2BC		TRAPPC11	SMG1	BCLAF3	ETFB
MAP11	C78859	CDK5R2	SLC16A6		FAM78B	PVALB	TST		ZBTB17			N4BP1	TMEM117	PAPSS1	MPP6	HIST1H4H		TTF1	SNAPC3	BCO2	ETOHD2
MAP2K5	CABYR	CDKL2	SLC25A43		FAM83G	QPCT	TSTA3		ZC3H3			NAB1	TMEM56	PAX9	MRPL54	HIST1H4J		UBE2G1	SNX27	BCR	EXOC3L
MAT2B	CACNA1A	CDKL3	SLC35C1		FAT1	QRSL1	TTR		ZFP423			NAT10	TMEM88	PCED1A	MRPS21	HIST2H2BE		UBE2J1	SNX30	BE692007	EXOC8
MCEE	CACNB2	CDKN1B	SLC35D2		FAT4	R3HDM2	UAP1L1		ZFP474			NCOR1	TMIE	PDE4A	MRPS25	HLF		UBR1	SOCS4	BEX4	EXOG
MDP1	CADM3	CDKN1C	SLC37A2		FBRS	RAB9	UBIAD1		ZFP513			NCSTN	TNMD	PDE4DIP	MRPS27	HOXA2		UBXN2A	SORL1	BEX6	FAAP100
MECR	CALCA	CDS1	SLC8B1		FBRSL1	RASGEF1C	USF1		ZFP628			NDST2	TNXB	PDP2	MSH3	HPSE		UEVLD	SOWAHC	BFSP2	FABP7
MED28	CALCOCO1	CEACAM16	SLC9B2		FCHO2	RASL12	USP46		ZFP976			NEK6	TOX	PEAR1	MTTP	HSBP1		ULK3	SP1	BICD2	FADD
MED30	CAMK2N1	CELF4	SNX10		FEM1B	RBP1	VKORC1L1		ZPLD1			NFIL3	TPD52L2	PER3	MYL4	HSD17B11		USP31	SP3	BID	FAHD1
MED31	CAMK4	CELSR2	SRI		FERMT2	REEP5	VPS26C		0610040J01RIK			NFKBIZ	TRIM47	PEX19	MYOC	HSD17B14		USP33	SPG11	BIN2	FAM122B
MED7	CAMSAP1	CELSR3	SRRT		FGD1	RETNLA	WFDC12		1700001C02RIK			NFRKB	TSC22D1	PGM5	NAALAD2	HSPB2		USP45	SPPL2A	BIRC5	FAM136A
METTL18	CAMSAP2	CEND1	ST8SIA6		FGD6	REX1BD	YJEFN3		1700012P22RIK			NGDN	TTC28	PIGH	NAALADL2	HSPBP1		USP9X	SREBF2	BLK	FAM162A
METTL25	CAMSAP3	CEP120	STEAP4		FLNB	RFTN2	ZBTB8OS		1700016K19RIK			NHLRC3	TUBB2B	PIK3R2	NANP	HTATSF1		UTP14B	SRSF4	BLM	FAM173A
MID1IP1	CAMTA2	CEP126	STFA1		FLNC	RNF11	ZDHHC16		1700024G13RIK			NIPBL	UBA1	PIR	NEGR1	HTR2C		UTP15	STAG2	BLMH	FAM185A
MIF	CAPN15	CERK	STFA2L1		FLRT2	RNF152	ZFP202		1700028P14RIK			NKAPD1	UBE2E2	PKP2	NFYC	HYI		VCPIP1	STAT5A	BLNK	FAM210B
MIF4GD	CAR13	CERS1	STON2		FNBP1L	RNF187	ZFP329		2410004P03RIK			NKIRAS2	UGT1A6A	PLA2G2E	NINJ2	ID4		VGLL4	STXBP5	BLVRB	FAM229B
MINDY3	CAR14	CFAP100	STXBP2		FNDC3B	RTN3	ZFP335OS		4833427G06RIK			NPAS2	UNC5B	PLA2G4B	NKX3-2	IFT172		VLDLR	SURF6	BMP2K	FAM3C
MORF4L2	CARD19	CHD5	SUB1		FNTB	S100A1	ZFP410		5430405H02RIK			NRAS	USP34	PLCB3	NLGN1	IFT43		VPS39	SYNCRIP	BMX	FAM50A
MRFAP1	CARF	CHGA	SURF4		FOS	SARS	ZFP51		6430531B16RIK			NSD3	UXS1	PLCXD1	NME7	IFT57		WAC	SYNE3	BNIP3L	FAM78A
MRPL13	CARMIL1	CHGB	TARM1		FOSB	SCAPER	ZFP652OS		6820408C15RIK			NUAK2	WDR4	PLXNB3	NNAT	IFT74		WDCP	SYNRG	BOP1	FAM98B
MRPL16	CARMIL3	CHIC1	TBP		FOSL1	SCARNA2	ZFP689		9330020H09RIK			NUP88	WFDC18	PNPLA3	NSDHL	IGSF11		WDR33	TADA1	BORA	FASTKD2
MRPL2	CASC3	CHMP2B	TBRG4		FOXK1	SCCPDH	ZFP942		B430218F22RIK			NUP93	WNT5B	POMGNT1	NT5DC2	IL10RB		WDR37	TASOR	BPGM	FBH1
MRPL20	CASKIN2	CHN1	TENT2		FOXP4	SCHIP1	ZFYVE19		GM10053			ODC1	ZBTB7C	POMGNT2	OSR1	IL11RA1		XIAP	TASOR2	BRCA1	FCGRT
MRPL21	CASTOR1	CHN1OS1	TFAP4		FREM1	SDHA	1110003F10RIK		GM10175			OSER1	ZC3H14	PPIP5K1	OXCT1	IL17RE		XPNPEP3	TBC1D8B	BRCA2	FH1
MRPL34	CASTOR2	CHPF	TGM1		FRK	SELENOK	1500002C15RIK		GM10275			PACS1	ZCCHC7	PPP1R16A	PADI1	INAFM1		YTHDC2	TBL2	BRD7	FKBP4
MRPL35	CASZ1	CHRD	TIAL1		FUBP1	SFXN5	1500015A07RIK		GM1113			PAXIP1	ZFP109	PPP1R26	PAM	INAVA		YTHDF3	TCEANC	BRD9	FLT3L
MRPL39	CATSPERZ	CHRM3	TINF2		FYCO1	SH3GL3	1600012H06RIK		GM11423			PCNX3	ZFP180	PPP5C	PANX3	ING4		ZBTB18	TCERG1	BRIP1	FN3K
MRPL4	CBFA2T2	CHRM5	TLR13		GAD1	SIRT3	1700012D14RIK		GM11739			PCSK7	ZFP189	PRELP	PARD3B	INSL6		ZBTB33	TENT4A	BRK1	FN3KRP
MRPL41	CBLC	CHRNA10	TLR6		GADD45B	SLC12A5	1700021J08RIK		GM11962			PDCD11	ZFP433	PRICKLE4	PARD6G	IRAK1BP1		ZBTB5	TENT4B	BRPF3	FOPNL
MRPL42	CBS	CHRNA6	TM4SF19		GALNT3	SLC16A11	1700028J19RIK		GM1322			PDCD6IP	ZFP566	PROM2	PCDH15	IRF2BP1		ZDHHC21	TES	BSDC1	FOXD1
MRPL44	CBX2	CHRNB2	TMEM91		GALNT7	SLC16A13	1700123M08RIK		GM15657			PDE10A	ZFP748	PRR12	PCOLCE	ISCU		ZFP113	TEX15	BTF3	FOXD2
MRPL46	CBX7	CHRNB3	TNFRSF11A		GAREM1	SLC25A12	1810012K08RIK		GM17494			PDE8A	ZFP790	PRTG	PCSK6	ISOC2A		ZFP125	TGS1	BTK	FOXD2OS
MRPL48	CCAR2	CHST2	TNFRSF4		GATA2	SLC25A14	1810024B03RIK		GM1821			PECAM1	ZFP862-PS	PSKH1	PDE1A	IZUMO4		ZFP160	THOC2	BTLA	FRA10AC1
MRPL50	CCDC114	CHST8	TNFRSF9		GCNT4	SLC25A15	1810062O18RIK		GM18290			PELP1	ZSCAN20	PTPN13	PDE8B	KAT5		ZFP229	TIA1	BTNL10	FRAT1
MRPL51	CCDC136	CHST9	TPCN2		GDAP10	SLC25A17	2010007H06RIK		GM20427			PES1	2310022B05RIK	PWWP3B	PDGFC	KCNA10		ZFP280B	TIAM1	BTNL9	FUNDC2
MRPL52	CCDC141	CIAPIN1	TPM3		GDF15	SLC26A4	2310026L22RIK		GM20458			PGS1	2610021A01RIK	PYGB	PDGFD	KCNE2		ZFP280C	TLR8	BTRC	FUZ
MRPL53	CCDC142	CIART	TRABD		GEM	SLC38A3	2510046G10RIK		GM20512			PHF7	4833422C13RIK	QSOX2	PDGFRL	KCNJ10		ZFP292	TMCC1	BUB1	FZD10
MRPL55	CCDC149	CIDEC	TREM1		GFM1	SLC4A10	2610203C22RIK		GM20661			PHKA2	5430419D17RIK	RAB30	PEMT	KCNK4		ZFP326	TMEM131	BUB1B	G3BP2
MRPS10	CCDC162	CIPC	TRIM11		GFOD2	SLC5A6	2810403D21RIK		GM24119			PIP5K1A	9130019P16RIK	RAB36	PENK	KCTD2		ZFP398	TMEM170B	BUB3	GALK1
MRPS12	CCDC174	CITED2	TUBGCP3		GK5	SLC8A3	2810408A11RIK		GM266			PITRM1	D430036J16RIK	RAB40B	PEPD	KDSR		ZFP445	TMOD3	BUD13	GAMT
MRPS14	CCDC186	CKB	TXNDC11		GLCE	SLC9A2	2900076A07RIK		GM26664			PLIN2	D430042O09RIK	RABGGTA	PET100	KEAP1		ZFP605	TMPPE	BUD23	GANAB
MRPS15	CCDC192	CKMT1	TXNDC5		GLIS3	SLC9A6	4833417C18RIK		GM29331			PLK3	GM10040	RAI1	PFDN5	KLC4		ZFP638	TMX3	BUD31	GAS6
MRPS16	CCDC25	CLASP2	TYSND1		GNRH1	SMCO3	4930455G09RIK		GM43154			PLSCR1	GM11583	RARG	PGAP1	KLHDC7A		ZFP654	TRAF3	BYSL	GASK1A
MRPS18A	CCDC9B	CLCN2	UBALD2		GOLGA3	SMIM10L1	4930558C23RIK		GM43604			POLR3C	GM14322	RBBP9	PHEX	KLHDC7B		ZFP709	TRAM2	BZW2	GATD1
MRPS28	CCL25	CLCN4	UBE2I		GOLGA4	SMIM18	4930589O11RIK		GM44170			POM121	GM15551	RECK	PHKB	KSR1		ZFP729B	TRAPPC8	C1GALT1	GBA2
MRPS31	CCM2L	CLEC18A	USB1		GON4L	SMIM26	4933412E12RIK		GM45261			PPIFOS	GM15677	RFLNA	PIEZO2	KYAT1		ZFP738	TRMT13	C1QA	GCAT
MRPS35	CCN2	CLEC2L	VIM		GPIHBP1	SMS	4933427D14RIK		GM4540			PPIL4	GM16096	RFNG	PIGK	L1TD1		ZFP81	TSN	C1QB	GEMIN2
MRPS36	CCN3	CLGN	WFDC17		GPR146	SNX14	5830408C22RIK		GM45640			PPP1R7	GM16861	RFXANK	PIP5K1B	LARS2		ZFP939	TTC9C	C1QBP	GEMIN8
MRPS7	CCNG1	CLIC6	XDH		GPR182	SNX16	5830444B04RIK		GM4791			PPP2CB	GM17035	RGL3	PLA2R1	LCMT2		ZFP945	TUBGCP4	C1QC	GFM2
MRPS9	CCNL2	CLIP4	XPC		GPRC5A	SOX21	9330159M07RIK		GM48443			PPP4R1	GM17080	RING1	PLTP	LENEP		ZFR	TUG1	C1QTNF12	GGA2
MSRB2	CCNYL1	CLK3	ZBTB25		GRPEL2	SPATA1	9430037G07RIK		GM6831			PPP4R3A	GM17344	RNF32	PODN	LETM2		ZFYVE16	UBA6	C1QTNF6	GGCX
MT-ATP8	CCSER2	CLMP	ZC3H7A		GTF3C4	SPTSSB	A630072M18RIK		GM6863			PPP6R3	GM17530	RNF5	POSTN	LHFPL1		ZFYVE27	URB1	C1RL	GIN1
MTCH2	CD14	CLRN1	ZFP217		HAMP	SS18	B230307C23RIK		GM7807			PRICKLE3	GM18649	RTL6	PPIC	LHFPL5		ZHX1	USP12	C1S1	GJC2
MTHFS	CD2AP	CLRN2	ZFP36L2		HAUS2	SS18L2	C130036L24RIK		GM973			PRKAG1	GM20716	RUNX1T1	PRDM6	LPO		ZKSCAN8	USP24	C3	GLB1L
MTLN	CD34	CLSTN3	ZFP414		HBEGF	ST3GAL3	C230037L18RIK		GM9803			PRKX	GM26620	SAYSD1	PRDX2	LPPOS		ZRSR2	USP37	CAAP1	GLRX2
MT-ND3	CD38	CLVS1	ZFP993		HBP1	STK39	C430014B12RIK		GM9844			PROS1	GM26779	SCARA3	PRICKLE1	LRRC51		ZYG11B	USP7	CACTIN	GLT8D1
MTPAP	CD80	CNNM1	0610010K14RIK		HDAC5	STMN3	E130215H24RIK		AC124502.3			PRPF38B	GM29084	SCML4	PRKCB	LRRC57		1700020I14RIK	USP8	CACYBP	GLT8D2
MZT2	CDA	CNP	1110038B12RIK		HDLBP	SUCLA2	E130307A14RIK		AC151602.1			PRPS1	GM29237	SCRIB	PRKG1	LSM14B		1810013L24RIK	VCL	CAD	GMCL1
NAA20	CDC14A	CNR1	1700020L24RIK		HECTD2	TCEAL3	F730043M19RIK					PRR14L	GM37963	SEMA6C	PRR5	LTC4S		3830408C21RIK	VIRMA	CALHM6	GMPR
NAA38	CDC14B	CNTF	1810032O08RIK		HGS	TCEAL8	GM10222					PSEN1	GM38901	SERTAD4	PRRG1	LTK		4930404I05RIK	VPS33B	CALR	GNG11
NDUFA12	CDC37L1	CNTN3	4833419F23RIK		HIF1AN	TCEAL9	GM10263					PSRC1	GM42884	SHF	PRSS35	MAF		4930412O13RIK	VPS4B	CAMK1D	GOLIM4
NDUFA13	CDC42BPA	CNTNAP1	BAMBI-PS1		HINFP	TECR	GM10353					PTGER1	GM42979	SIRT2	PTGER3	MAGEH1		4932422M17RIK	VPS54	CAMKK2	GORASP1
NDUFA2	CDC42BPB	CNTNAP2	GM10288		HIP1R	TESC	GM10516					PTPN12	GM44199	SIRT5	PTH1R	MANBAL		6430511E19RIK	WASHC4	CAMP	GPD1L
NDUFA7	CDC42BPG	COL9A2	GM11714		HIPK2	THEM4	GM10658					PTPN2	GM44731	SLAIN1	PTPRM	MANSC1		8030462N17RIK	WDR26	CAP1	GPR89
NDUFA8	CDC42EP1	COLQ	GM14866		HIVEP1	THY1	GM10766					PWP2	GM45669	SLC16A2	PTPRT	MAOB		9330161L09RIK	WDR75	CAPN3	GPT
NDUFAF1	CDC42EP4	COPRS	GM15265		HIVEP2	TIGAR	GM10785					PXK	GM45819	SLC16A4	QPRT	MAPK15		A230083G16RIK	WDR77	CAPZA1	GSKIP
NDUFAF2	CDH22	COQ10A	GM15856		HMGXB3	TIMM9	GM11243					PXN	GM48342	SLC25A19	RASGRF2	MAPK3		A930004J17RIK	XPO4	CAPZB	GSTM4
NDUFB11	CDH3	CORIN	GM17300		HMX2	TM2D1	GM11491					PYROXD1	GM48529	SLC26A11	RCN3	MARCH2		B230219D22RIK	XPR1	CAR1	GTF2E1
NDUFB1-PS	CDH5	CORO2B	GM20056		HMX3	TMCO3	GM11642					QARS	GM48597	SLC35A1	RCOR2	MARCKSL1		C130013H08RIK	XRN2	CAR2	GTF2H2
NDUFB3	CDIP1	CPEB1OS1	GM30934		HPCAL4	TMEM135	GM12207					RAB31		SLC35G1	RELN	MARVELD1		C130071C03RIK	YEATS2	CAR9	GTF2H3
NDUFB4	CDK15	CPEB2	GM37724		HR	TMEM200B	GM12279					RAB35		SLC8A2	RFESD	MBLAC2		C130083M11RIK	YTHDF2	CARD11	GTF2H4
NDUFB4C	CDK16	CPLX1	GM43138		HS6ST1	TMEM223	GM12843					RAB3GAP2		SMARCA1	RGS3	MCOLN3		C330002G04RIK	ZBTB1	CARD9	GTPBP3
NDUFB7	CDK19	CPNE4	GM44729		HSPA1A	TMEM233	GM13067					RAB7B		SMIM10L2A	RGS4	MDH2		D130020L05RIK	ZBTB26	CARHSP1	GYS1
NDUFB9	CDK20	CPNE6	GM44873		HSPA1B	TMEM255A	GM13194					RANBP9		SMIM22	RHOBTB1	MDK		D530018E20RIK	ZBTB9	CARNMT1	H2AFV
NDUFC1	CDK3	CPNE9	GM45205		HSPA2	TMEM64	GM13205					RARA		SMTNL2	RMDN2	MDM1		D930015M05RIK	ZC3H11A	CARS	H2-KE6
NDUFS4	CDKL4	CPT1B	GM47126		HTT	TMLHE	GM13245					RBM15		SNAPC2	RNF182	MEAF6		GM10557	ZEB2	CASD1	HACD1
NDUFS6	CDKN1A	CRBN	GM49041		ICK	TMSB15L	GM13470					RBM15B		SNCAIP	RNLS	MED9		GM10642	ZFP131	CASP1	HADHA
NDUFS7	CDO1	CREBL2	GM7730		IER3	TNFRSF21	GM13562					RBM5		SNUPN	RPGR	METTL21A		GM10812	ZFP236	CASP2	HCN3
NDUFS8	CDON	CREG2	GM7972		IER5L	TNFRSF25	GM13830					RBM7		SOX2OT	RPS6KC1	MFAP1B		GM12265	ZFP407	CASP3	HDAC10
NDUFV2	CDR2L	CRHBP	GPR137B-PS		IFNAR1	TOMM6OS	GM13966					RBMS1		SPATS2L	RSPO3	MFSD3		GM14057	ZFP458	CASP4	HDAC2
NDUFV3	CDS2	CRHR1	IGHV10-1		IGF2BP2	TPGS2	GM14472					REG3G		SPEG	RUFY4	MFSD4B4		GM14399	ZFP526	CASP7	HDDC3
NEDD8	CEBPB	CRIM1	IGHV1-34		IGF2BP3	TRMT61B	GM14584					RELB		SPIN2C	SAMD12	MFSD5		GM15601	ZFP568	CASP8	HDHD3
NENF	CELF3	CRIP2	IGHV1-54		IGF2R	TRPM1	GM14863					RESF1		SPRN	SARDHOS	MIB2		GM16008	ZFP619	CASS4	HEATR3
NEURL2	CELF5	CRTAC1	IGHV2-9		IKZF2	TSPAN3	GM15347					REV3L		SRR	SATB2	MIEN1		GM16153	ZFP62	CAT	HEMK1
NME1	CENPB	CRYBB1	IGKV2-112		IKZF5	TTC1	GM15422					RFX5		SSH1	SCML2	MINAR2		GM16310	ZFP800	CBX1	HES6
NNT	CEP104	CRYM	IGKV4-57		IL1R1	TTC33	GM15513					RGS1		SSPN	SDHAF2	MINDY4		GM17096	ZFP84	CC2D2B	HIBCH
NOP10	CEP170B	CSDE1	IGKV4-80		IL6ST	TWNK	GM15608					RGS2		STARD8	SDK1	MIR99AHG		GM17552	ZFP971	CCDC115	HIKESHI
NOX1	CEP95	CSMD1	IGKV5-48		ILF3	TXNDC15	GM15787					RHBDF2		STOML1	SELENOM	MIRG		GM19265	ZSCAN29	CCDC12	HINT2
NPB	CES1D	CSMD2	IGKV8-16		ILRUN	UBE2E1	GM15853					RLF		STX1A	SERPINA9	MITF		GM20008	ZZEF1	CCDC125	HINT3
NPEPL1	CES2E	CSRNP2	IGKV9-124		ING2	UBE2Q2	GM15860					RND1		STXBP4	SERPIND1	MLPH		GM2026	2610002M06RIK	CCDC134	HIST1H1C
NRG4	CFAP300	CSTAD			INSIG2	UBFD1	GM15956					RNF111		SYAP1	SERPINF1	MMAA		GM20695	5430414B19RIK	CCDC138	HIST1H1E
NTPCR	CFAP44	CTIF			IRF6	UCMA	GM16196					RNF115		SYNC	SERPINH1	MMP11		GM26566	5830417I10RIK	CCDC22	HIST1H2AC
NUBPL	CFAP54	CTNNA2			IRS1	UQCRC2	GM16209					RNF125		SZRD1	SETD3	MNAT1		GM26674	6530409C15RIK	CCDC34	HIST1H2BE
NUDC	CFAP74	CTNND2			ITGA11	VAMP4	GM16541					RNF19B		TAB1	SH3RF3	MOB2		GM26792	9230114K14RIK	CCDC58	HIST1H4C
NUDT3	CFL2	CTSF			ITGA3	VAPB	GM16973					RNF216		TAF1A	SH3YL1	MOB3B		GM26833	9930120I10RIK	CCDC71L	HIST1H4I
OARD1	CGN	CUL7			ITPK1	VDAC1	GM17066					RNF38		TANGO2	SHISA3	MOCS2		GM26873	A130010J15RIK	CCDC77	HIST2H3C2
OCM	CHADL	CUX2			ITPKB	VWA8	GM17077					RNF4		TBC1D4	SIDT1	MOCS3		GM26899	B430305J03RIK	CCDC88B	HIST3H2A
OLA1	CHD2	CXXC4			ITPKC	WEE1	GM17586					RNF40		TCHP	SLC13A3	MON1A		GM28036	E330009J07RIK	CCDC88C	HLTF
OXLD1	CHD4	CYGB			ITPRID2	WTIP	GM19391					RNF44		TCTN2	SLC16A12	MORF4L1		GM29008	GM10044	CCL12	HNMT
PAGR1A	CHD9	CYHR1			JMJD1C	WWOX	GM1976					RNPS1		TEAD2	SLC18A1	MPC1		GM35240	GM10521	CCL19	HPF1
PAICS	CHIA1	CYP2A5			JUN	XKR6	GM20163					RRP12		TFCP2	SLC19A1	MPV17L		GM36936	GM15344	CCL3	HPS4
PARK7	CHKA	CYP2S1			KANK1	YBX2	GM20274					RRP1B		TGFB3	SLC22A2	MRAP2		GM36989	GM16174	CCL4	HS1BP3
PARL	CHKB	CYP4X1			KAT6A	YWHAH	GM20463					RSC1A1		THAP7	SLC22A4	MRNIP		GM37310	GM16185	CCL5	HSD17B4
PBLD1	CHL1	CYSTM1			KBTBD4	YWHAQ	GM20522					SAA3		THBS3	SLC22A6	MROH3		GM38057	GM16568	CCL6	HSPA4
PCCA	CHMP4C	DACT1			KCMF1	ZBED5	GM20662					SAT1		THNSL2	SLC22A8	MRPL11		GM38077	GM17193	CCL8	HSPA8
PCDHGC4	CHMP7	DBN1			KDM2A	ZC4H2	GM26530					SAV1		TLN2	SLC24A3	MRPL27		GM38194	GM18329	CCM2	HSPB11
PDAP1	CHRNA7	DCBLD1			KDM5B	ZFP428	GM26733					SBNO2		TMED1	SLC25A26	MRPL45		GM41664	GM20492	CCNA2	HYKK
PDCD5	CHRNA9	DCTN1			KDM6A	ZFP946	GM2694					SDCBP2		TMEM109	SLC25A40	MRPL9		GM42664	GM21092	CCNB1	ICE2
PDCD6	CHSY3	DCUN1D4			KDM6B	ZNHIT6	GM28437					SEC23B		TMEM129	SLC26A2	MRPS33		GM42672	GM21811	CCNB2	IDH2
PDCL	CHUK	DDAH1			KIF13A	1110051M20RIK	GM28439					SEC24C		TMEM161A	SLC2A13	MRPS6		GM42937	GM21897	CCND2	IDNK
PDSS2	CIC	DDHD2			KIF26A	1500002F19RIK	GM29394					SERPINB8		TMEM185A	SLC30A10	MSX1		GM43031	GM27232	CCND3	IFI27
PECR	CIRBP	DDN			KIF2A	1500015O10RIK	GM29434					SETD1B		TMEM201	SLC36A2	MSX3		GM43080	GM35035	CCNE1	IFT22
PEX7	CLASP1	DDX25			KIRREL	1700001K23RIK	GM29603					SETDB1		TMEM237	SLC47A1	MTCH1		GM43300	GM36445	CCNE2	IFT52
PFDN6	CLASRP	DEFB25			KLF12	1700021F05RIK	GM31166					SFMBT1		TMEM255B	SLC6A12	MTHFD2L		GM43481	GM37261	CCNF	IFT80
PHPT1	CLBA1	DEFB42			KLF13	1700023F06RIK	GM31749					SGPL1		TMEM28	SLC6A13	MTMR11		GM44123	GM37270	CCNH	IGF2
PIGF	CLCA2	DEGS1			KLRG2	1700029I15RIK	GM32885					SH2B2		TMEM8	SLC6A20A	MVB12A		GM44321	GM42735	CCNJ	IGFALS
PIN4	CLCN6	DENND5A			KMT2A	1700056N10RIK	GM3362					SH2D3C		TNFRSF19	SLIT3	MXI1		GM45838	GM42836	CCP110	IGHG1
PLIN3	CLDN12	DENND6B			KMT2E	2310040G24RIK	GM37274					SH3BP5		TNFSF12	SMOC2	N4BP2OS		GM45867	GM43041	CCPG1	IGHV11-2
POLE4	CLDN14	DEXI			KRIT1	2410004B18RIK	GM37292					SHOC2		TNK2	SMPD3	NAPRT		GM45892	GM43059	CCR2	IGHV1-42
POLR1D	CLDN2	DFFA			KRT18	2810425M01RIK	GM37353					SIN3B		TRAF3IP1	SORCS2	NAT8F1		GM45899	GM43375	CCR3	IGHV1-76
POLR2D	CLDN8	DGKE			KRT19	2900079G21RIK	GM37494					SIRT1		TRIL	SOST	NAT8F3		GM47260	GM43863	CCR6	IGHV5-17
POLR2G	CLIP1	DHTKD1			KRT8	3110083C13RIK	GM37503					SLC2A9		TRIM17	SOX6OS	NAT8F4		GM47798	GM43980	CCR7	IGHV5-9-1
POLR2I	CLIP2	DHX30			LAD1	4930402H24RIK	GM37758					SLC30A1		TRIM46	SP7	NAT8F5		GM48368	GM44070	CCR9	IGKV14-126
POLR2K	CLIP3	DIPK1B			LAMA4	4930452B06RIK	GM38384					SLC39A1		TRIM68	SPATA24	NAT9		GM48765	GM44777	CCT2	IGKV4-53
POLR2L	CLK2	DIRAS1			LAMC2	4930528J11RIK	GM40117					SLC39A8		TRIM7	SRBD1	NAXD		GM49125	GM45110	CCT3	IGKV4-61
POLRMT	CLMN	DIXDC1			LAMC3	6330403K07RIK	GM4189					SLC43A2		TSPAN15	SRPK3	NBL1		GM49204	GM45151	CCT4	IGKV4-74
POP7	CLOCK	DLAT			LCOR	9030619P08RIK	GM42418					SLX4		TSPAN4	SRPX	NDE1		GM49378	GM45515	CCT5	IGKV4-79
PPIA	CLSTN1	DLGAP1			LDB2	9230102O04RIK	GM42595					SMC5		TTC12	SRPX2	NDUFA10		GM49863	GM47652	CCT6A	IGKV6-17
PPP1R21	CLTB	DLGAP3			LETM1	9430053O09RIK	GM42783					SMG5		TTC23	SSTR4	NDUFA4		GM5784	GM48348	CCT7	IGKV6-25
PPP1R35	CLTC	DMAC2			LGMN	9430065F17RIK	GM42858					SMIM15		TTC26	ST6GALNAC3	NDUFA6		GM5901	GM48349	CD101	IGKV8-21
PPP3CA	CLVS2	DMGDH			LGR6	A330009N23RIK	GM43203					SMN1		TTC30B	STAC	NDUFB10		GM8066	GM49077	CD109	IGKV8-28
PRELID1	CMKLR1	DMXL2			LIF	A330093E20RIK	GM43474					SNHG15		TTC5	STAMOS	NDUFB6		GM9864	GM49322	CD177	IKBIP
PRMT6	CMTM4	DNAJB14			LMNA	A530017D24RIK	GM43692					SOCS3		UBQLN4	STARD9	NDUFC2		GM9993	GM49336	CD180	IL17D
PSAP	CNDP1	DNAJC12			LMTK2	A830019P07RIK	GM43852					SP2		UGGT2	STEAP3	NDUFS2			GM49759	CD19	IL18
PSENEN	CNDP2	DNAJC18			LNCPINT	B130034C11RIK	GM44220					SP4		ULK4	STK3	NDUFS3			GM6654	CD1D1	IMPDH1
PSMA2	CNIH2	DNAJC27			LONP1	B230369F24RIK	GM44647					SPRTN		UNC13B	STX18	NDUFV1			GM9775	CD2	INPP5B
PSMA4	CNKSR2	DNAJC6			LOX	B630019K06RIK	GM44775					SPTLC2		USP13	SUGCT	NEIL2				CD200R1	INPP5E
PSMA6	CNN3	DNER			LOXL4	C230062I16RIK	GM45619					SPTY2D1		USP35	SULT2B1	NFS1				CD209C	INTS10
PSMB5	CNNM3	DNLZ			LPIN3	C330011M18RIK	GM45716					SRF		WDR13	SUPT3	NIPSNAP2				CD22	INTS3
PSMB6	CNNM4	DNM1			LRCH1	E030013I19RIK	GM45846					SRP72		WDR19	SYT5	NIT1				CD226	INTS4
PSMB7	CNOT11	DNM1L			LRCH3	GM10754	GM47103					SRRM1		WDR31	SYT9	NKX6-1				CD247	INTS8
PSMC2	CNRIP1	DNM3			LRP5	GM10925	GM47408					SRSF11		WDR35	TANGO6	NLGN2				CD24A	INVS
PSMD6	CNTFR	DOCK3			LRRC10B	GM11627	GM47439					SSH2		WDTC1	TASP1	NLK				CD27	IP6K3
PSMD9	CNTN1	DOCK6			LRRC41	GM13446	GM47469					STAT3		WNT16	TATDN1	NOTUM				CD300A	IPO11
PTGES3	CNTN2	DOCK7			LRRC75A	GM14443	GM48142					STAT5B		WNT2B	TBC1D32	NOTUMOS				CD300C	IPO8
PTPRCAP	CNTN5	DOCK9			LRRC8B	GM15270	GM4824					STAT6		WNT5A	TECTB	NPFF				CD300C2	IPPK
PUSL1	CNTNAP5A	DOK4			LRRC8E	GM15663	GM48278					TAB2		WNT6	TEN1	NQO1				CD300LB	IQCC
R3HCC1L	COASY	DOK6			LSM1	GM15879	GM48420					TAF2		WSCD1	TG	NR1H4				CD300LD	IRF3
RAB14	COCH	DOK7			LSR	GM1673	GM48551					TAF9		WSCD2	THBD	NR2C1				CD300LD3	IRX3OS
RAB24	COG2	DPF1			LTBR	GM17322	GM48623					TATDN2		XYLT2	TMEFF2	NR2F2				CD300LG	IRX6
RAB2A	COG3	DPP6			LY6G6C	GM17690	GM49027					TBC1D15		YLPM1	TMEM119	NRN1L				CD302	ISOC1
RAB33B	COG7	DPYSL2			LYPD3	GM19461	GM49356					TBC1D20		ZC2HC1C	TMEM45B	NSMCE3				CD36	ISOC2B
RALBP1	COL4A3	DPYSL4			MACC1	GM20498	GM49369					TBC1D23		ZC3H13	TRIQK	NT5M				CD37	ISY1
RAMAC	COL4A3BP	DPYSL5			MAFF	GM20604	GM49521					TBK1		ZDHHC8	TSPAN18	NUDT2				CD3D	ITGB3BP
RARS2	COL4A4	DSEL			MAL2	GM20646	GM49591					TCEANC2		ZFP108	TTC27	NUDT4				CD3E	JMJD7
RBM17	COLGALT2	DST			MALSU1	GM20712	GM49883					TDRD7		ZFP11	TTC37	NUDT9				CD3EAP	JMJD8
RBM42	COPG1	DSTYK			MAMDC4	GM20721	GM5860					TET2		ZFP119A	TTLL5	NXPH4				CD3G	JOSD2
RBM8A	CORO6	DTD2			MAML3	GM22613	GM7153					TFPI2		ZFP14	TUSC3	OCIAD2				CD4	JPX
RBX1	CP	DTNA			MAP2K3OS	GM26636	GM7240					TGFBI		ZFP235	UBE2H	OLFR1372-PS1				CD40	KCNE3
RDM1	CPE	DUPD1			MAP3K7	GM26881	GM7435					THAP6		ZFP239	UBE2R2	OLFR986				CD44	KCTD11
RENBP	CPEB1	DUSP15			MAP4K3	GM26896	GM7862					THBS1		ZFP260	UROD	OPLAH				CD47	KCTD12B
RER1	CPEB3	DUSP26			MARK2	GM27151	GM8250					THRAP3		ZFP3	VKORC1	OSBPL7				CD48	KCTD14
RHEB	CPLANE1	DUSP27			MARVELD2	GM28438	GM9392					THSD4		ZFP346	VPS35L	P3H3				CD5	KCTD21
RIDA	CPPED1	DYNC1I1			MARVELD3	GM29216	GM9752					TMA16		ZFP418	VPS8	PANK1				CD52	KCTD7
RNASEK	CPSF4L	DYNC1LI2			MAST2	GM30191	GM9887					TMED10		ZFP422-PS	VTI1A	PANK4				CD53	KDELC2
RNF7	CPT1A	DYNLL2			MAST4	GM31105	IGHV1-47					TMED5		ZFP454	VTN	PANTR1				CD55	KDM4C
RPL24	CR974462.2	DYNLT3			MED10	GM32817	IGHV2-6					TMEM173		ZFP512	VWC2	PANTR2				CD5L	KHK
RPL35A	CRB2	DZANK1			MED13	GM42568	IGHV4-1					TMEM251		ZFP523	WDPCP	PAQR6				CD6	KIT
RPL36AL	CREB3	DZIP1			MED15	GM42639	IGHV6-3					TNFAIP3		ZFP60	ZCWPW1	PARTICL				CD68	KIZ
RPL38	CREB3L2	EBF1			MEDAG	GM42846	IGKV4-86					TNFRSF1A		ZFP606	ZDHHC15	PATZ1				CD69	KLF5
RPLP1	CREB5	ECE2			MEF2D	GM42847	AA465934					TNFRSF26		ZFP61	ZFP438	PCCB				CD7	KLHL13
RPP14	CREBRF	EDIL3			MEX3D	GM43173	AC125059.3					TNFSF9		ZFP641	1700120C14RIK	PCGF1				CD72	KLRB1A
RPP30	CRMP1	EDNRB			MGA	GM43566						TNIP1		ZFP647	2010204K13RIK	PCMTD2				CD74	KLRB1B
RPS13-PS1	CRTC2	EEF1A2			MGI:3648991	GM43668						TNIP2		ZFP651	2210408I21RIK	PCSK4				CD79A	KPNA2-PS
RPS21	CRY1	EFCAB2			MIR22HG	GM44002						TOP2B		ZFP667	2700054A10RIK	PCYT2				CD79B	KPTN
RPS23	CRY2	EFNB3			MISP	GM44509						TOP3A		ZFP691	2810433D01RIK	PDCD7				CD82	L3HYPDH
RPS25	CRYAB	EFR3A			MKNK2	GM44732						TOP3B		ZFP719	3830403N18RIK	PDXDC1				CD83	LACTB2
RPS29	CRYBB3	EFS			MKRN2	GM45051						TOPORS		ZFP74	4930422M22RIK	PEF1				CD84	LAGE3
RSPO2	CRYBG3	EGFL6			MMRN2	GM45236						TOR1AIP1		ZFP763	4930452G13RIK	PEX16				CD86	LAMTOR2
RTF2	CS	EGLN2			MNT	GM45507						TOR2A		ZFP780B	5530601H04RIK	PEX2				CD8A	LBH
RTRAF	CSNK1D	EID2			MORC2A	GM47135						TOX4		ZFP882	9130024F11RIK	PEX6				CD8B1	LEFTY1
S100A13	CSNK1E	EIF4A2			MORC4	GM4825						TRAF6		ZFP93	A230056P14RIK	PFDN1				CD96	LEKR1
S100A4	CSNK1G1	EIF4G3			MPZL3	GM49201						TRAF7		ZFP94	D630008O14RIK	PGM1				CDC20	LIG4
S100B	CSNK1G3	EIF5A2			MTA1	GM49486						TRIOBP		ZFP940	GM10037	PGRMC1				CDC23	LIX1
SAE1	CSRNP3	ELAVL2			MT-ND4L	GM49539						TRIP12		ZFP964	GM10401	PHETA1				CDC25A	LMAN2L
SAMM50	CTBP2	ELAVL3			MUC1	GM5124						TRMT44		ZFP970	GM11837	PID1				CDC25B	LRPAP1
SCAND1	CTDSP2	ELAVL4			MUL1	GM5737						TSR1		ZFP982	GM13031	PIGYL				CDC25C	LRPPRC
SDCCAG8	CTH	ELMOD1			MYO10	GM7467						TUBB6		ZHX2	GM13293	PIK3R4				CDC26	LRRC14
SDHD	CTNNBIP1	ELMOD3			MYO18A	GM830						TUT1		ZIC1	GM13341	PIP4P1				CDC34	LRRC38
SEC11C	CTNND1	ELOVL4			MYO1C	GM9905						UBAP1		ZIC3	GM15816	PKM				CDC42	LRRC45
SELENOS	CTNS	ELOVL5			MYO1E	GM9925						UBAP2L		ZIC4	GM16133	PKP1				CDC42EP3	LRRCC1
SEPT2	CTSL	EMC7			MYO5B	AC166575.1						UBE2D3		ZKSCAN4	GM16701	PLA2G7				CDC42SE1	LUC7L3
SEPT5	CTTN	EML1			MYO9A	CT010467.1						UBE2G2		ZMYM3	GM17120	PLCD4				CDC45	LXN
SERF2	CTTNBP2	ENAH			MYOF							UBE2Q1		ZMYM6	GM26903	PLPP6				CDC5L	MAGIX
SFR1	CTXN1	ENDOD1			N4BP2L2							UHRF1BP1L		ZNRD1AS	GM27998	POLL				CDC6	MAGT1
SH3BGRL	CTXN3	ENDOG			NAA25							UPP1		ZSCAN18	GM28610	POLR3GL				CDC7	MAP2K2
SHARPIN	CUEDC1	ENO2			NAB2							USP3		ZSCAN2	GM29683	POP5				CDCA2	MAP3K4
SIL1	CUL1	ENOX1			NABP1							UTP4		ZSWIM9	GM31520	POU3F3				CDCA3	MAVS
SLC25A3	CX3CL1	ENPP5			NACC1							UVRAG		1700003E16RIK	GM3235	PPCS				CDCA4	MBLAC1
SLC33A1	CXCL17	ENSA			NAGA							VMP1		1700013F07RIK	GM37335	PPP1R1A				CDCA5	MCAT
SLC37A4	CYB561	ENTR1			NAPA							VPS26B		1700030J22RIK	GM41307	PPP1R1B				CDCA7	MCCC2
SLC41A3	CYB561D1	EPB41L3			NAV1							VSIG10L		2510002D24RIK	GM42802	PPP1R37				CDCA7L	MCUR1
SLC44A3	CYB5B	EPB41L4A			NCKAP5L							WASF2		2610027K06RIK	GM43848	PPP2R3D				CDCA8	MED18
SLC51A	CYB5D1	EPHX4			NCOA2							WASHC5		2700046G09RIK	GM45592	PPP4R4				CDIPTOS	MED19
SLC5A11	CYC1	EPYC			NCOA3							WBP11		2700081O15RIK	GM45627	PRDX6				CDK1	MEIS1
SLC6A20B	CYP1B1	ERICH3			NECTIN2							XBP1		2810402E24RIK	GM47958	PRMT2				CDK17	METTL16
SLIRP	CYP26A1	ERMN			NEDD4L							YKT6		3110056K07RIK	GM48159	PRMT5				CDK2	METTL3
SMARCAL1	CYP26B1	ESRRA			NFKB2							YY1		4632404H12RIK	GM49172	PROB1				CDK4	METTL4
SMDT1	CYP2D22	ESRRG			NFKBIA							ZBTB34		4833411C07RIK	GM49749	PROCA1				CDK5RAP2	METTL5
SMIM11	CYP4F17	ETL4			NFX1							ZBTB42		4921531C22RIK	GM7097	PTER				CDK5RAP3	MFSD8
SMIM14	CYTH2	ETNK1			NGF							ZC3H12A		4930556M19RIK	GM8189	PTGES3L				CDK6	MFSD9
SMIM20	CYYR1	ETV1			NID1							ZC3H4		4930570G19RIK	AC132253.4	PXMP2				CDK8	MGME1
SMIM27	D3ERTD254E	EXTL1			NID2							ZDHHC18		4933428P19RIK		RAB17				CDKAL1	MINDY2
SMIM4	D5ERTD579E	EXTL2			NKTR							ZDHHC20		5930430L01RIK		RAB1A				CDKN2AIPNL	MKKS
SMIM8	D7ERTD443E	FA2H			NNMT							ZFP110		7530414M10RIK		RAB28				CDKN2C	MLH3
SNAPC5	DAB2	FAAH			NOCT							ZFP143		8030453O22RIK		RAB5B				CDKN2D	MLST8
SNF8	DAB2IP	FAIM2			NOTCH1							ZFP207		9030025P20RIK		RABAC1				CDKN3	MLX
SNHG3	DACT2	FAM110B			NPAT							ZFP36		9130213A22RIK		RAD1				CDR2	MMAB
SNRNP27	DAG1	FAM124A			NR2C2							ZFP593		9330104G04RIK		RAD9B				CDV3	MMACHC
SNRNP35	DAGLA	FAM131A			NR4A1							ZFP668		A230103J11RIK		RAI2				CDYL	MMP23
SNRNP70	DBNDD2	FAM131B			NR4A2							ZFP865		A330023F24RIK		RAPGEF3				CEACAM1	MMUT
SNRPD2	DBT	FAM135A			NR4A3							ZMYND15		A430018G15RIK		RASSF10				CEACAM10	MORN2
SOD1	DCAF10	FAM13C			NR6A1							ZNFX1		A430033K04RIK		RASSF6				CEBPA	MPND
SOSTDC1	DCAF5	FAM155A			NRD1							0610043K17RIK		A930024E05RIK		RBM11				CEBPE	MRGPRF
SPA17	DCAF6	FAM163B			NRIP1							1700017B05RIK		B230217C12RIK		RBM4B				CELA1	MRM2
SPAG7	DCAF8	FAM166B			NT5C1A							1700071M16RIK		B230311B06RIK		RDH14				CENPA	MRM3
SPTSSA	DCBLD2	FAM168A			NUAK1							2310022A10RIK		B930059L03RIK		RETREG2				CENPC1	MRPL12
SREK1IP1	DCDC2A	FAM169A			NUMB							2610005L07RIK		C230013L11RIK		RFT1				CENPE	MRPL14
SRP68	DCLK2	FAM184A			NUP98							3110001I22RIK		C630043F03RIK		RFXAP				CENPF	MRPL24
SRP9	DCP1B	FAM189A1			NXPH3							4833403J16RIK		CJ186046RIK		RHBDD3				CENPH	MRPL28
SRRD	DCT	FAM189A2			OCLN							4930481B07RIK		D130017N08RIK		RHEBL1				CENPI	MRPL36
SSBP1	DCTN4	FAM196B			OSGIN1							4930562F07RIK		D630003M21RIK		RHPN1				CENPJ	MRPL49
ST13	DCUN1D3	FAM20B			OSMR							4932438A13RIK		D630023F18RIK		RILP				CENPK	MRPS2
STARD3	DCXR	FAM216A			OTOL1							4933416M07RIK		D630045J12RIK		RLBP1				CENPL	MRPS22
STX8	DDI2	FAM221A			OTUD4							5430416N02RIK		E230025N22RIK		RNF128				CENPM	MRPS5
SUCLG1	DDIT4	FAM43B			PACSIN2							9230111E07RIK		E430018J23RIK		RNF215				CENPN	MRRF
SUMF1	DDX19B	FAM57B			PAGR1B							C130040N14RIK		GM10033		ROGDI				CENPO	MSH2
SUMO1	DDX24	FAM81A			PAPOLG							D230025D16RIK		GM10220		ROMO1				CENPP	MTAP
SURF1	DENND2A	FAM8A1			PAPSS2							E030030I06RIK		GM10501		RPAP3				CENPQ	MTERF4
SVIP	DENND5B	FASTKD1			PARD3							GM10392		GM10561		RPP25L				CENPS	MTG2
SWI5	DEPTOR	FBLL1			PARD6B							GM10550		GM11611		RPRM				CENPT	MTIF2
SYNJ2BP	DGCR2	FBXL16			PARP3							GM15886		GM12258		RPS15A-PS4				CENPU	MTIF3
TACO1	DGLUCY	FBXL21			PBRM1							GM16576		GM12903		RRAGA				CENPW	MTR
TAF7	DHDDS	FBXO16			PCBP2							GM17024		GM13420		RRAGD				CEP128	MTRF1
TBPL1	DHX32	FBXO21			PCDH1							GM17201		GM13563		RRNAD1				CEP135	MUC3A
TDRD3	DHX35	FBXO25			PCDHB21							GM17825		GM14168		RSPH9				CEP152	MUS81
TEX261	DICER1	FBXO27			PCDHGA1							GM19951		GM14296		RTL8A				CEP192	MYCN
THEM5	DIO3OS	FBXO40			PCDHGA5							GM20257		GM14326		RTL8B				CEP250	MYEF2
THOC3	DIP2A	FBXO41			PCDHGC5							GM26699		GM14387		RTN2				CEP295	MYL9
TIMM10	DIP2B	FBXO44			PDE4B							GM28289		GM14403		RUBIE				CEP55	NAA16
TIMM13	DIP2C	FBXO45			PDGFRA							GM28529		GM14421		SAP30L				CEP57	NADSYN1
TIMMDC1	DIPK2B	FBXO8			PDGFRB							GM30238		GM14435		SARAF				CEP57L1	NAGK
TM2D3	DISP1	FBXW7			PDK4							GM37939		GM15512		SAT2				CEP72	NAGLU
TM4SF5	DISP2	FCHSD1			PDPK1							GM38253		GM15535		SCARF2				CEP76	NARF
TM9SF2	DISP3	FCRLB			PDPN							GM38287		GM15612		SCNM1				CEP83	NAXE
TMEM134	DLC1	FEZ1			PDZD2							GM39318		GM15655		SCX				CEP89	NCBP2
TMEM150B	DLG2	FGD5			PEA15A							GM41077		GM15998		SDF2				CERKL	NCK1
TMEM160	DLG4	FGF10			PEAK1							GM42815		GM16638		SDHAF1				CERS6	NDUFA4L2
TMEM186	DLG5	FGF11			PEG10							GM43071		GM17018		SDHAF4				CES2G	NDUFAF3
TMEM192	DLK2	FGF12			PHACTR4							GM43622		GM17131		SDHB				CETN3	NDUFAF7
TMEM230	DLL1	FGF18			PHF20							GM44226		GM17132		SDHC				CFB	NDUFAF8
TMEM242	DLL4	FGF9			PHF21A							GM44616		GM17249		SDR42E1				CFL1	NEAT1
TMEM256	DLX1	FGFR4			PHF3							GM44878		GM17597		SEC22B				CGAS	NEIL1
TMEM258	DLX2	FHOD3			PHLDA1							GM45221		GM18807		SEC62				CHAC2	NEK1
TMEM263	DMRTA1	FICD			PHYKPL							GM45709		GM20045		SETD4				CHAF1A	NEK3
TMEM267	DMWD	FIGNL2			PI4KB							GM45737		GM20444		SF3B2				CHAF1B	NELFB
TMEM41A	DNAJB12	FJX1			PIAS1							GM46432		GM21926		SHLD1				CHD1L	NELFCD
TMEM50A	DNAJB5	FKBP14			PKP3							GM47079		GM21986		SHPK				CHEK1	NEMP2
TMEM50B	DNAJB9	FLCN			PLAGL1							GM47218		GM26587		SIAH2				CHEK2	NGLY1
TMEM60	DNAJC16	FLRT1			PLAT							GM47761		GM26645		SIRT4				CHID1	NIT2
TMEM68	DNAJC5	FLT3			PLEC							GM48145		GM26673		SIX2				CHIL1	NME3
TMEM86A	DNAL1	FLVCR2			PLEKHG2							GM48274		GM26694		SIX5				CHIL5	NME4
TMEM87A	DNM3OS	FLYWCH1			PLEKHG3							GM49325		GM26751		SKIDA1				CHIT1	NOC3L
TMEM9B	DNMBP	FMN2			PLEKHH2							GM49342		GM26981		SKP1A				CHMP6	NQO2
TMSB15B1	DOC2G	FNDC10			PLEKHO1							GM49643		GM29737		SLC12A9				CHN2	NR1H3
TOMM34	DOK5	FNDC4			PLET1							GM49747		GM32699		SLC18B1				CHORDC1	NR3C1
TOMM7	DOP1A	FNDC5			PLXDC2							GM49785		GM37090		SLC22A17				CHRAC1	NSG2
TRAPPC1	DPEP2	FOXD3			PLXNA2							GM6477		GM37584		SLC22A18				CHRDL1	NSUN4
TRAPPC2	DPF2	FOXJ1			PMEPA1							GM6598		GM37694		SLC25A4				CHST12	NTHL1
TRAPPC5	DPP8	FPGT			PODXL							GM6649		GM38250		SLC27A3				CHST13	NTN3
TRAPPC6B	DRAM2	FRMD3			POF1B							GM7932		GM41177		SLC2A12				CHST15	NUDT13
TRIAP1	DRP2	FRMD5			POGZ							GM9725		GM43254		SLC2A8				CHST3	NUDT16L1
TRIM13	DSC2	FRMPD1			POLR3A							GM9823		GM43338		SLC35F2				CHST7	NUDT7
TRIR	DSCAM	FRS3			POLR3D							AC144621.2		GM43437		SLC44A2				CHSY1	NUDT8
TRMT10C	DTNB	FRY			POU2F1							AC158975.2		GM43609		SLC45A2				CHTF18	NUMA1
TRMT2B	DTX3	FSCN2			PPA1									GM45148		SLC46A1				CIAO2A	NUP35
TSR3	DUS3L	FSD1			PPARD									GM45871		SLC4A11				CIB1	NXF1
TSTD1	DUSP16	FUK			PPL									GM46404		SLC50A1				CIDEB	NYNRIN
TSTD3	DUSP6	FXYD3			PPP1R13L									GM47204		SLC5A3				CIITA	OCEL1
TXNDC17	DUSP8	FXYD7			PPP2R2A									GM47547		SLC5A5				CINP	OGFOD3
UBE2E3	DVL1	FZD2			PPP2R2D									GM47863		SLC6A7				CIP2A	OMA1
UBE2L3	DVL3	FZD9			PPRC1									GM48488		SLC9A3R2				CIT	OPHN1
UBLCP1	DYNC1H1	GABBR1			PRAG1									GM48562		SMAD6				CKAP2	ORAI3
UBXN1	DYNC1I2	GABBR2			PRDM10									GM48701		SMARCA2				CKAP2L	ORC4
UFC1	DYNC1LI1	GABRG2			PRDM4									GM49163		SMIM12				CKAP4	ORMDL2
UGP2	DYNLRB1	GAL3ST3			PRKAG2OS2									GM49317		SMIM19				CKLF	OTOR
UQCR11	DYSF	GALNT11			PRKD3									GM49357		SMOC1				CKS1B	OVCA2
UQCRB	DZIP1L	GALNT13			PRPF6									GM49442		SMPD2				CKS2	P4HA1
UQCRH	E2F5	GALNT14			PRPF8									GM49700		SMPX				CLCA3A1	PAK1IP1
UQCRQ	ECE1	GALNT9			PRRC2C									GM6277		SMUG1				CLDN1	PANX1
USE1	ECEL1	GALT			PRRG4									GM6658		SNAPIN				CLDN13	PAQR7
UTP3	ECHDC2	GATA3			PRSS22									GM9776		SNHG10				CLDN15	PARS2
UXT	ECI2	GDAP1			PRSS8									GM9929		SNTA1				CLEC10A	PBXIP1
VAMP7	ECM1	GDAP1L1			PSD									AI838599		SNW1				CLEC12A	PCBD2
VAMP8	EDA2R	GDE1			PSMC3											SNX32				CLEC1B	PCGF6
VCP	EDC4	GDPD1			PSMD8											SOX17				CLEC2D	PCP4L1
VDAC2	EDN1	GFAP			PSME4											SOX2				CLEC2G	PCTP
VDAC3	EFCAB12	GFPT2			PTGES											SPAAR				CLEC2I	PCYOX1L
VPS25	EFCAB7	GFRA4			PTGS2											SPAG4				CLEC4A1	PDCD4
VPS28	EFNA4	GGT7			PTK7											SPNS1				CLEC4A2	PDE6D
VPS50	EFNB2	GHITM			PTP4A1											SPTLC3				CLEC4A3	PDF
VPS51	EFR3B	GJC3			PTP4A2											SREBF1				CLEC4B1	PDK1
VTI1B	EGR3	GJD2			PTPN11											ST6GALNAC2				CLEC4B2	PDLIM2
WDR11	EHBP1	GKAP1			PTPN23											STARD3NL				CLEC5A	PDS5B
WDR25	EHD3	GLS2			PTPN4											STUB1				CLEC7A	PDZD11
WDR53	EHHADH	GM525			PTPRA											SUDS3				CLEC9A	PDZPH1
WDR61	EHMT1	GNAI1			PTPRB											SUPT7L				CLIC1	PEG12
XRCC2	EI24	GNAL			PTPRG											SURF2				CLINT1	PEX10
YAF2	EIF2AK4	GNAS			PTPRK											SWSAP1				CLP1	PEX26
YIPF4	ELFN2	GNB5			PTPRQ											TACR3				CLSPN	PFKL
YIPF5	ELK1	GNG13			PTPRS											TADA2A				CLYBL	PGAP2
YPEL3	ELMO3	GNG3			PTRH1											TBC1D7				CMAH	PGBD1
YPEL5	ELN	GNG7			PTX3											TBCB				CMAS	PGP
YTHDC1	EMC1	GNL1			PUM1											TBX1				CMTM3	PGPEP1
YWHAB	EMD	GNPDA2			PVR											TBX18				CMTM7	PHGDH
ZADH2	EML2	GOPC			QRICH1											TCAIM				CNBD2	PIGB
ZBTB12	EML5	GOT1			QTRT2											TCEA3				CNGB1	PIGP
ZBTB14	ENC1	GPER1			RAB11B											TCF7L2				CNN2	PIGZ
ZC3HC1	ENDOU	GPHN			RAD54L2											TCN2				CNOT9	PIK3C2B
ZCCHC10	EOGT	GPM6B			RAPGEF1											TCTA				CNPY3	PIM2
ZCCHC4	EPAS1	GPR135			RAPGEF5											TERF2IP				CNR2	PISD-PS1
ZCRB1	EPB41L1	GPR137			RAPH1											TESK2				CNTLN	PISD-PS2
ZDHHC12	EPB41L5	GPR137C			RASSF1											TFPT				COA4	PLATR25
ZFP277	EPC2	GPR155			RASSF7											THAP3				COA5	PLEKHJ1
ZFP706	EPDR1	GPR156			RBM22											THTPA				COG5	PLEKHN1
ZFP932	EPHA1	GPR173			RBM3OS											TIMM29				COL5A1	PLPP4
ZFP943	EPHA10	GPR22			RBP7											TIMM8B				COL6A2	PLSCR4
ZFP991	EPHA4	GPR3			RDH13											TK2				COLGALT1	PLXND1
ZFP994	EPHA5	GPR37L1			REEP3											TLE4				COMMD10	PNCK
ZMAT2	EPHB3	GPR45			RELA											TM2D2				COMMD2	POFUT1
ZMAT5	EPM2AIP1	GPR61			RERG											TMED4				COP1	POGLUT1
ZNHIT1	EPN2	GPR62			REV1											TMEM106C				COPA	POLR2B
ZNHIT2	EPN3	GPR75			REXO1											TMEM126A				COPB2	POLR3K
ZXDB	EPOP	GPR85			RFX3											TMEM132A				COPS3	POMK
1110059G10RIK	EPPK1	GPRASP1			RGL1											TMEM141				COPZ1	POMT1
1600002K03RIK	EPS8L2	GPRASP2			RGS16											TMEM144				CORO1A	PPCDC
1810021B22RIK	ERBB2	GPSM1			RGS20											TMEM191C				CORO1B	PPDPF
1810022K09RIK	ERBB3	GPT2			RHPN2											TMEM199				CORO2A	PPFIA4
1810026B05RIK	ERC2	GRAMD2			RIC8A											TMEM205				CORO7	PPIE
1810037I17RIK	ERCC4	GRB14			RIN1											TMEM221				COTL1	PPIL3
2300009A05RIK	ERCC5	GREM2			RIOK2											TMEM250-PS				CPA3	PPP1R14A
2310031A07RIK	ERGIC1	GRIA2			RIPK2											TMEM37				CPNE2	PPP1R3B
2310039H08RIK	ERICH1	GRIA3			RND3											TMEM42				CPOX	PPP3CB
2810405F17RIK	ERLEC1	GRIA4			RNF2											TMEM44				CPSF3	PPT1
3830406C13RIK	ERMARD	GRID2IP			RNF24											TMEM53				CPSF4	PRDM16OS
4930453N24RIK	ESPN	GRIK2			RNFT1											TMEM59				CR2	PRDX3
9130230N09RIK	ESRP1	GRIK4			RNH1											TMEM70				CRACR2A	PRDX4
9430081H08RIK	ESRP2	GRIN1			ROR1											TMEM79				CRAT	PRKRA
9530085L11RIK	ESS2	GRIN2C			ROR2											TMPRSS6				CREB3L1	PRMT9
9630001P10RIK	ESYT2	GRIN2D			RPL17-PS10											TMTC4				CREG1	PROSER3
A730061H03RIK	ETFBKMT	GRIP1			RPL17-PS3											TPD52L1				CRELD2	PRPS2
A930003A15RIK	ETFDH	GRIP2			RPL36-PS12											TPGS1				CRIP1	PRPSAP2
A930005H10RIK	ETV3	GRM4			RPS27RT											TPRKB				CRLF3	PRRC2A
C030006N10RIK	ETV4	GRM7			RPS6KA4											TRAPPC3				CSE1L	PRSS53
C030034I22RIK	ETV5	GRM8			RPTOR											TRMU				CSF1	PRUNE1
C230035I16RIK	EVA1C	GRSF1			RRAS2											TRP53I13				CSF1R	PRXL2B
C330007P06RIK	EVI5L	GRXCR2			S100A14											TRP53RKA				CSF2RA	PSAT1
D030062O11RIK	EXTL3	GSPT2			S100A16											TRPM4				CSF3R	PSD2
D630033A02RIK	EYA1	GSS			S1PR2											TRPT1				CSGALNACT1	PSIP1
E130311K13RIK	EYA4	GTF3C3			SAMD4											TSEN15				CSGALNACT2	PSMG3
AC121821.2	EZH1	GTPBP8			SAP130											TSEN34				CSK	PSPH
AC132452.5	FABP3	HABP4			SAP30BP											TSNAX				CSNK2B	PSTK
AC133523.4	FAM102A	HAMP2			SBF2											TSPAN10				CSPP1	PTCD2
AC154328.1	FAM107A	HAPLN1			SBNO1											TSPAN12				CST7	PTCD3
AL731706.1	FAM110C	HAPLN2			SCAF8											TSPAN13				CSTDC4	PTGFR
GM10109	FAM118A	HAPLN4			SCNN1G											TSPAN31				CSTF1	PTGR2
GM10252	FAM129B	HCAR1			SDC3											TSPYL1				CTBP1	PTHLH
GM10638	FAM149A	HCN2			SDC4											TTC38				CTCF	PTS
GM11379	FAM160B2	HCN4			SDK2											TTLL3				CTDNEP1	PWWP3A
GM12655	FAM171A2	HCRTR2			SDR16C5											TTLL6				CTLA2B	PYCR2
GM12940	FAM171B	HDAC11			SEC24B											TUBG1				CTNNBL1	PYCRL
GM12953	FAM199X	HDGFL3			SEMA6A											TUBGCP6				CTRL	PYURF
GM13625	FAM20A	HEBP2			SEMA6D											TYR				CTSC	QDPR
GM14327	FAM20C	HECW2			SERINC2											U2AF1L4				CTSE	R74862
GM14493	FAM219A	HEPACAM			SERPINA3N											UBALD1				CTSG	RAB13
GM15287	FAM222A	HERPUD1			SERPINE1											UBL7				CTSH	RAB19
GM15351	FAM222B	HEXIM1			SERTAD1											UPF2				CTSS	RAB26
GM17163	FAM229A	HEY1			SERTAD2											UPF3A				CTSW	RABEP2
GM21860	FAM53C	HEY2			SETBP1											UPF3B				CUL4A	RAD51C
GM21988	FAM76A	HIGD1B			SETD5											UQCR10				CUTC	RAD51D
GM21992	FAM83F	HMGCS2			SETX											UQCRFS1				CUX1	RAD52
GM26716	FAM83H	HOMER2			SF1											USP21				CX3CR1	RAMP2
GM26905	FAN1	HPDL			SFN											VEGFB				CXCL12	RANBP3L
GM27286	FARP1	HRASLS			SFSWAP											VEPH1				CXCL5	RANGRF
GM28913	FASN	HRH3			SGK1											VMAC				CXCL9	RAP2A
GM33051	FASTK	HS3ST1			SGMS1											VMN2R29				CXCR3	RAPSN
GM34220	FAXC	HS3ST2			SH2D4B											VPS13D				CXCR4	RBBP5
GM36976	FBLIM1	HS3ST3A1			SH3BP4											VPS18				CXCR5	RBCK1
GM37374	FBXL18	HS3ST3B1			SH3PXD2A											VPS37D				CXCR6	RBM12B2
GM37477	FBXL20	HSBP1L1			SH3PXD2B											WBP1				CYB561A3	RBM4
GM37691	FBXL3	HSDL2			SH3RF2											WDR27				CYB5R4	RBM45
GM4013	FBXL4	HSF4			SHANK2											WDR6				CYBB	RCN1
GM4032	FBXO11	HSP90AA1			SHB											WNK4				CYBC1	RECQL5
GM42984	FBXO17	HSPA12A			SHPRH											WNT9A				CYFIP1	REEP6
GM43263	FBXO28	HTR3A			SHROOM3											XYLB				CYP4B1-PS2	RETSAT
GM4332	FBXO32	HTR7			SHROOM4											YBEY				CYP4F18	REXO2
GM43672	FBXO38	HYAL1			SIK2											YIPF3				CYP4V3	RGS9
GM43778	FBXO4	ICA1L			SIKE1											ZBTB11OS1				CYSLTR2	RIF1
GM43857	FBXW10	ID3			SIPA1L2											ZBTB8A				CYTH4	RIIAD1
GM44103	FBXW11	IDH3A			SIPA1L3											ZER1				CYTIP	RIPOR3
GM44386	FBXW5	IDS			SKIL											ZFP185				D1ERTD622E	RMDN1
GM44694	FBXW8	IFFO1			SLC25A44											ZFP444				D6WSU163E	RMDN3
GM45133	FBXW9	IFITM10			SLC34A2											ZFP560				DAAM1	RMI1
GM45444	FERMT1	IGFBP6			SLC35F5											ZFP579				DAP	RMND1
GM47101	FEZ2	IGIP			SLC35F6											ZFP580				DAPP1	RNF135
GM47283	FGF1	IGSF21			SLC38A4											ZFP599				DARS	RNF145
GM47766	FGF2	IL15RA			SLC39A2											ZFP707				DARS2	RNF219
GM48273	FGF23	INA			SLC39A6											ZFP750				DBF4	RNF8
GM4924	FGFBP1	INPP5F			SLC6A14											ZFP770				DBNL	RPGRIP1L
GM49395	FGFR1	INSIG1			SLC6A6											ZFP772				DCAF12	RPL19-PS3
GM49741	FGFR3	INSYN1			SLC7A1											ZFP938				DCAF13	RPP38
GM5617	FGFR3-PS	IPO4			SLC7A11											ZFP944				DCK	RPUSD3
GM6704	FIBIN	IQANK1			SLC9A3R1											ZFP960				DCLRE1B	RTL10
GM7072	FIGN	IQCB1			SLC9A4											ZFP97				DCPS	RTN4IP1
GM7331	FILIP1	IQSEC3			SLCO2A1											ZFP975				DCTD	RUFY1
	FIRRE	IRX1			SMAD3											ZIC2				DCTPP1	S100A3
	FITM2	IRX2			SMARCA4											ZIC5				DCUN1D5	S1PR5
	FKBP10	IRX5			SMCR8											ZMYND12				DDOST	SBSPON
	FKBP1A	ISL1			SMIM7											ZSCAN26				DDX10	SCAMP4
	FKBP5	ISL2			SMURF1											0610009B22RIK				DDX11	SCFD1
	FKTN	ISLR2			SMURF2											1110008P14RIK				DDX18	SCLT1
	FLII	ITGA10			SNORA73B											1110012L19RIK				DDX21	SCLY
	FLRT3	ITGA8			SNRK											1110017D15RIK				DDX27	SCRN2
	FLT1	JAG2			SNRNP200											1110018N20RIK				DDX31	SCRN3
	FLVCR1	JAKMIP3			SNX9											1110059E24RIK				DDX39	SDC2
	FMN1	JKAMP			SOD2											1300002E11RIK				DDX47	SEC31B
	FMO2	JPH4			SOGA1											1700001O22RIK				DDX49	SEMA3B
	FN1	KANK4			SOX4											1700003D09RIK				DDX51	SENP3
	FNBP1	KANTR			SPATA13											1700040D17RIK				DEDD2	SENP8
	FOLR1	KBTBD2			SPATA2											1700105P06RIK				DEF6	SEPT10
	FOXF2	KBTBD3			SPECC1L											2010315B03RIK				DEK	SERF1
	FOXG1	KCNA2			SPEN											2210011C24RIK				DENND1A	SERPINB9
	FOXJ2	KCNA5			SPHK1											2210016L21RIK				DENND1C	SFI1
	FOXJ3	KCNA6			SPINT1											2310009B15RIK				DENND2C	SFXN1
	FOXK2	KCNAB2			SPRR1A											2310010J17RIK				DENND2D	SFXN4
	FOXO1	KCNAB3			SPRY2											2610001J05RIK				DENND4A	SGCE
	FOXO3	KCNB2			SRC											2610035D17RIK				DEPDC1A	SGSH
	FOXO6	KCNC1			SRCAP											2610035F20RIK				DEPDC1B	SH3BP1
	FOXP1	KCNC2			SRGAP1											2700016F22RIK				DERA	SH3GLB2
	FOXQ1	KCNC3			SRGAP2											2700046A07RIK				DERL2	SHISA2
	FREM2	KCND1			SRXN1											2810001G20RIK				DET1	SHTN1
	FRG2F1	KCND3			ST14											2810032G03RIK				DGCR8	SIAE
	FRMD6	KCNH2			ST6GAL1											2810039B14RIK				DGKA	SIGIRR
	FRMD8	KCNH7			STAM2											2810468N07RIK				DGKD	SIGMAR1
	FRMPD4	KCNIP1			STAU1											2900052L18RIK				DGKG	SLC13A5
	FRRS1L	KCNIP2			STC2											2900093K20RIK				DHFR	SLC25A1
	FRS2	KCNIP3			STEAP1											4833419O12RIK				DHRS11	SLC25A10
	FRZB	KCNIP4			STIMATE											4921507P07RIK				DHRS7	SLC25A11
	FSD1L	KCNJ11			STK40											4930405A21RIK				DHX37	SLC25A35
	FSTL1	KCNJ12			STYX											4930412F12RIK				DIAPH2	SLC25A36
	FSTL3	KCNJ3			SUCO											4930426D05RIK				DIAPH3	SLC25A39
	FTO	KCNJ9			SUFU											4930579K19RIK				DIPK1A	SLC26A6
	FURIN	KCNK1			SUN1											4933434E20RIK				DIRAS2	SLC29A3
	FUT2	KCNK3			SUPT6											4933439C10RIK				DIS3L2	SLC2A4RG-PS
	FUT9	KCNK5			SVEP1											5031425E22RIK				DKC1	SLC30A6
	FXR1	KCNK9			SYNE2											5330438D12RIK				DLEU2	SLC35B2
	FXR2	KCNN1			TACSTD2											5830454E08RIK				DLGAP5	SLC46A3
	FYTTD1	KCNQ4			TAF1											6030442K20RIK				DLST	SLC4A1AP
	FZD1	KCNQ5			TAF8											9030612E09RIK				DMTN	SLC4A2
	FZD3	KCNS1			TAGAP1											9130604C24RIK				DNA2	SLC52A2
	FZD4	KCNS3			TAX1BP3											9330151L19RIK				DNAH8	SLC7A10
	FZD6	KCNT1			TCF12											9430092D12RIK				DNAJB1	SLC7A4
	FZD7	KCTD17			TCF20											9530068E07RIK				DNAJB11	SLCO1C1
	GAA	KCTD4			TEAD4											9530077C05RIK				DNAJC11	SLX1B
	GAB1	KCTD8			TENM4											9930017N22RIK				DNAJC2	SMCO4
	GABARAPL1	KHDRBS2			TENT5B											A330035P11RIK				DNAJC7	SMIM1
	GABRB3	KIDINS220			TESK1											A430103D13RIK				DNAJC8	SMIM6
	GABRE	KIF1BP			TET3											A430105J06RIK				DNAJC9	SNAI2
	GADD45G	KIF21A			TFE3											A530020G20RIK				DNASE1L3	SNX17
	GALC	KIF26B			TFIP11											A730063M14RIK				DND1	SON
	GALNT15	KIF3A			TGIF1											A930012O16RIK				DNM2	SORCS3
	GALNT16	KIF5A			TGM2											B230118H07RIK				DNMT1	SORD
	GALNT17	KIF5B			THBS2											B330016D10RIK				DNMT3B	SOX8
	GALR2	KIF5C			THBS4											D730044K07RIK				DNPH1	SPATS1
	GAN	KIFAP3			TIMP1											E230020A03RIK				DNTT	SPCS1
	GAP43	KIFC2			TINAGL1											E330013P04RIK				DNTTIP1	SPHK2
	GARNL3	KLC1			TIPRL											E530011L22RIK				DOCK11	SPICE1
	GATAD2B	KLC2			TJP2											F420014N23RIK				DOCK2	SPOUT1
	GBF1	KLHDC3			TLE1											G730003C15RIK				DOCK5	SPP2
	GCSH	KLHDC8A			TLE3											GM10169				DOCK8	SPRYD4
	GDI1	KLHDC8B			TLK2											GM10478				DOK1	SPTBN5
	GDPD5	KLHL22			TM4SF1											GM10639				DOK2	SRD5A1
	GFOD1	KLHL26			TM9SF4											GM10643				DOK3	SRP14
	GFRA1	KLHL29			TMBIM1											GM10644				DONSON	SSBP3
	GGN	KLHL3			TMCC3											GM10687				DPF3	SSSCA1
	GGPS1	KLHL32			TMEM125											GM10762				DPH1	ST3GAL6
	GIGYF1	KLHL7			TMEM171											GM10863				DPH2	ST6GALNAC6
	GIT1	KLHL8			TMEM214											GM12346				DPH6	STIP1
	GJA4	KNCN			TMEM51											GM12406				DPP3	STK16
	GJC1	KNDC1			TMPRSS3											GM13594				DRAM1	STRADA
	GLA	KRT10			TMTC3											GM13596				DSCC1	STRC
	GLDN	KRT222			TNFRSF11B											GM14097				DSE	STX16
	GLE1	L1CAM			TNFRSF12A											GM14964				DSN1	STX4A
	GLG1	LAMC1			TNFRSF22											GM15122				DTL	SUGP2
	GLI2	LANCL1			TNFRSF23											GM15280				DTNBP1	SUMF2
	GLI3	LAPTM4B			TNK1											GM16136				DTWD1	SUPV3L1
	GLIS2	LARGE1			TNN											GM16201				DTYMK	TAF6
	GLUL	LDLRAD3			TNRC18											GM17110				DUSP2	TAF6L
	GLYR1	LEMD1			TNRC6B											GM17634				DUT	TAMM41
	GNA11	LEMD3			TNRC6C											GM17661				DYM	TARBP1
	GNA14	LGI1			TNS3											GM17705				DYNLL1	TARSL2
	GNAO1	LGI2			TOM1											GM19196				DYNLT1F	TATDN3
	GNB1	LGI3			TRAF3IP2											GM19918				DYRK3	TAZ
	GNE	LGI4			TRAPPC10											GM20033				E2F1	TBC1D19
	GNL2	LGR4			TRIB1											GM20627				E2F2	TBCC
	GNL3L	LGR5			TRIM33											GM20878				E2F4	TBCK
	GNMT	LHFPL3			TRIM56											GM2115				E2F7	TCF24
	GNPTG	LHFPL4			TRIP11											GM21981				E2F8	TCTE2
	GOLGA1	LIMK1			TRIP6											GM26617				EAF2	TELO2
	GOLGA2	LIMK2			TRPM7											GM26641				EAR1	TERT
	GOLGA7B	LIN28B			TSC22D2											GM26804				EAR2	TEX2
	GOLGB1	LIN7B			TSG101											GM26808				EAR6	TEX9
	GORAB	LIN7C			TSPAN5											GM28959				EAR-PS9	TFF2
	GOT2	LINGO1			TSPAN8											GM3435				EARS2	THA1
	GPAM	LIX1L			TTC24											GM36371				EBI3	THAP11
	GPAT3	LMBR1			TTLL4											GM37376				EBP	THAP2
	GPAT4	LMO3			TTPAL											GM37397				ECT2	THOC5
	GPATCH1	LMTK3			TUNAR											GM4211				EDC3	THOC7
	GPATCH2	LONRF2			TUT4											GM43118				EDEM1	THOP1
	GPATCH8	LPAR3			UBC											GM43136				EDEM2	THUMPD2
	GPD1	LPAR4			UBE2J2											GM43653				EDRF1	TIMM22
	GPKOW	LPIN1			UBE2N											GM4419				EEF1A1	TIMM50
	GPLD1	LRFN1			UBE2V2											GM44502				EEF1AKMT4	TKFC
	GPR107	LRFN2			UBE2Z											GM44593				EEF1B2	TLE2
	GPR143	LRFN3			UBE4BOS3											GM44618				EEF1E1	TMCO1
	GPR153	LRFN5			UBN1											GM45453				EEF1G	TMCO6
	GPR157	LRP11			UBR2											GM47031				EEF2	TMEM101
	GPR158	LRP3			UBR4											GM47205				EEF2K	TMEM107
	GPR161	LRRC14B			UBTD2											GM47232				EEFSEC	TMEM116
	GPR176	LRRC24			UFM1											GM47673				EEPD1	TMEM126B
	GPR19	LRRC3B			UHRF1BP1											GM48226				EFCAB11	TMEM143
	GPR4	LRRC4			ULK2											GM4876				EFL1	TMEM147
	GPR63	LRRC49			UNC45A											GM48882				EFTUD2	TMEM14A
	GPRC5B	LRRC4B			UNKL											GM49066				EHBP1L1	TMEM158
	GPRC5C	LRRC4C			UPRT											GM49179				EHD1	TMEM175
	GPRIN1	LRRC55			USF3											GM49329				EHD4	TMEM206
	GPX2	LRRC71			USO1											GM49396				EIF1AD	TMEM208
	GRAMD1B	LRRC73			USP27X											GM49417				EIF2A	TMEM218
	GRASP	LRRC75B			USP28											GM49492				EIF2AK1	TMEM220
	GRB7	LRRC8D			USP36											GM49797				EIF2B3	TMEM29
	GREB1	LRRN1			USP43											GM49886				EIF2S1	TMEM35B
	GREB1L	LRRN2			USP6NL											GM5069				EIF2S2	TMEM39A
	GRHL1	LRRN3			USPL1											GM5089				EIF2S3X	TMEM39B
	GRHL2	LRRTM1			VASN											GM9922				EIF3B	TMEM61
	GRID1	LRRTM3			VAT1											AA914427				EIF3D	TMEM67
	GRIK5	LRTM2			VDR											AC109619.1				EIF3E	TMEM80
	GRRP1	LSAMP			VEGFA											AC126031.1				EIF3G	TMEM81
	GSK3A	LURAP1L			VPS37C											AC132307.1				EIF3H	TMEM9
	GSK3B	LYNX1			VRK3															EIF3I	TMEM94
	GSN	LYPD1			VSIG4															EIF3K	TNFRSF18
	GSTA3	LYPD6			VTA1															EIF3L	TNFSF13
	GSTM2	LYPD6B			VWA5A															EIF3M	TNFSF13OS
	GSTM7	LYSMD2			WDR45B															EIF4A1	TNFSFM13
	GSTZ1	LZTS1			WDR47															EIF4A3	TOMM40L
	GTF2IRD1	LZTS3			WDR48															EIF4E2	TOP1MT
	GTF3C1	MAB21L1			WFDC3															EIF4E3	TPI1
	GTF3C2	MAB21L2			WFS1															EIF4EBP1	TPP1
	GUCY1A2	MAFA			WHAMM															EIF4EBP2	TPR
	GZF1	MAGED1			WIPI1															EIF4G2	TPRA1
	H1F0	MAGEE1			WIPI2															EIF5A	TPSB2
	H2AFJ	MAGEE2			WNT7A															EIPR1	TPST1
	H2AFY2	MAGI1			WNT7B															ELAC2	TRA2A
	HAS3	MAGI2			WSB2															ELANE	TRAPPC12
	HBS1L	MAIP1			WWC1															ELAVL1	TRERF1
	HCN1	MAL			WWTR1															ELDR	TRIM45
	HDAC4	MANEAL			XPOT															ELF1	TRIP4
	HDAC6	MAOA			XRN1															ELF4	TRIT1
	HDGFL2	MAP1B			YARS															ELOB	TRMT10B
	HECA	MAP2K4			YRDC															ELOC	TRMT12
	HECTD2OS	MAP3K10			ZBTB21															ELOVL1	TRMT1L
	HECTD3	MAP3K12			ZBTB49															ELP4	TRMT9B
	HECW1	MAP6			ZDBF2															EME1	TSACC
	HEG1	MAP7D2			ZDHHC23															EMILIN1	TSC2
	HERC3	MAP9			ZDHHC5															EMILIN2	TSEN2
	HES1	MAPK10			ZFAND2A															EMP3	TSFM
	HES7	MAPK4			ZFAND3															ENGASE	TSGA10
	HEYL	MAPK8IP1			ZFP1															ENPP3	TSPAN6
	HGSNAT	MAPK8IP2			ZFP106															EPB41	TSPYL3
	HIC2	MAPRE3			ZFP12															EPB42	TTC14
	HID1	MAPT			ZFP142															EPOR	TTC21B
	HIF3A	MARCH3			ZFP146															EPSTI1	TTC30A1
	HILPDA	MAST1			ZFP148															EPX	TTC4
	HIP1	MATR3			ZFP169															ERCC6L	TTC41
	HIPK3	MBP			ZFP26															ERG	TTC8
	HIPK4	MCF2L			ZFP282															ERG28	TTI1
	HIST1H4K	MCHR1			ZFP317															ERH	TUBGCP5
	HIST3H2BA	MCTS2			ZFP335															ERI1	TUFM
	HIVEP3	MDGA1			ZFP366															ERI2	TVP23B
	HMBOX1	MDGA2			ZFP382															ERLIN1	TXN2
	HMG20A	ME1			ZFP397															ERMAP	TXNDC12
	HMGN3	ME3			ZFP46															ERO1LB	TXNL4B
	HMGN5	MECOM			ZFP507															ERP29	TYW5
	HOGA1	MEG3			ZFP551															ERP44	U2SURP
	HOMER1	MEGF10			ZFP553															ESCO1	UBA5
	HOMER3	MEGF8			ZFP57															ESCO2	UBXN2B
	HOOK2	MEOX2			ZFP592															ESM1	UFSP2
	HRCT1	MEPCE			ZFP597															ESPL1	UQCC2
	HRK	MEST			ZFP608															ESR1	UQCC3
	HS3ST5	MET			ZFP618															ETHE1	UROS
	HS6ST3	METTL17			ZFP623															ETS1	USF2
	HSF2	METTL7A1			ZFP646															EVI2	USHBP1
	HSPA12B	MFN1			ZFP655															EVI2A	USP11
	HSPA9	MFN2			ZFP672															EVI2B	USP40
	HSPB1	MFSD2A			ZFP687															EVL	VARS2
	HSPB8	MGAT3			ZFP7															EXO1	VPS13A
	HTRA4	MGAT4C			ZFP703															EXO5	VPS13C
	HUNK	MIAT			ZFP704															EXOC1	VSTM4
	HYAL2	MICU3			ZFP715															EXOC3	WDR41
	HYAL3	MIGA1			ZFP787															EXOC3L2	WDR5B
	IARS2	MIGA2			ZFP850															EXOC3L4	WDR73
	ICMT	MINDY4B-PS			ZFP868															EXOC4	WDR83
	ICOSL	MIR124-2HG			ZFP90															EXOC6	WDR86
	ID1	MIR124A-1HG			ZFP954															EXOSC1	WDR92
	IFFO2	MKLN1OS			ZFP973															EXOSC2	WDYHV1
	IFITM2	MKRN2OS			ZFX															EXOSC5	WRAP53
	IGDCC3	MLC1			ZIM1															EXOSC7	WRAP73
	IGF1R	MLF2			ZKSCAN14															EXOSC8	XKR8
	IGFBP3	MLLT11			ZKSCAN17															EXOSC9	XPO1
	IGFBP7	MMD2			ZMIZ2															EXT1	XRCC5
	IGLON5	MMGT1			ZNRF3															EZH2	XXYLT1
	IGSF9	MMGT2			ZPR1															F10	YIPF1
	IGSF9B	MOBP			ZSWIM4															F2RL2	YIPF2
	IK	MOG			ZZZ3															F2RL3	ZBTB3
	IKBKG	MOK			1700022N22RIK															F5	ZBTB40
	IL17RB	MORN4			1700023B13RIK															F8	ZC3H15
	IL17RC	MOSMO			1700084C06RIK															FAAP24	ZC3H8
	IL17RD	MPHOSPH8			1810055G02RIK															FABP5	ZC3HAV1L
	IL20RB	MPP3			2610037D02RIK															FAF1	ZCCHC17
	ILDR1	MPZ			2610307P16RIK															FAM107B	ZCCHC8
	ILDR2	MRLN			2610507B11RIK															FAM111A	ZDHHC9
	INCA1	MRO			2810457G06RIK															FAM117A	ZFAND1
	INHA	MT3			4930500M09RIK															FAM126A	ZFAND6
	INHBB	MTAG2			4932442E05RIK															FAM129A	ZFAT
	INKA2	MT-ATP6			5330438I03RIK															FAM129C	ZFP111
	INPP1	MT-CYTB			6820431F20RIK															FAM167B	ZFP128
	INPP5J	MTERF2			9130008F23RIK															FAM169B	ZFP133-PS
	INPP5K	MTMR6			9130019O22RIK															FAM172A	ZFP141
	INPPL1	MTMR7			9230104M06RIK															FAM207A	ZFP157
	INSR	MT-ND1			9330188P03RIK															FAM220A	ZFP174
	INTS13	MT-ND2			B130055M24RIK															FAM241A	ZFP182
	IP6K1	MT-ND6			B930094E09RIK															FAM49B	ZFP184
	IP6K2	MT-RNR2			C230038L03RIK															FAM53B	ZFP213
	IPO13	MTX3			E230016M11RIK															FAM83D	ZFP273
	IQCG	MXRA8			GM10012															FANCB	ZFP300
	IQSEC1	MYCBP2			GM10123															FANCD2	ZFP322A
	IQSEC2	MYH10			GM10135															FANCG	ZFP324
	IRF2BPL	MYH14			GM10177															FANCI	ZFP354B
	IRGQ	MYH7B			GM10382															FANCL	ZFP367
	IRS2	MYL6B			GM10532															FAR2	ZFP40
	IRX3	MYO15			GM10575															FARS2	ZFP41
	ISM1	MYO16			GM11574															FARSA	ZFP420
	ITGAV	MYO6			GM11747															FAU	ZFP449
	ITGB4	MYOM3			GM11769															FBL	ZFP457
	ITGB8	MYORG			GM11808															FBLN5	ZFP493
	ITIH2	MYPOP			GM11973															FBN2	ZFP524
	ITIH5	MYRIP			GM12404															FBP1	ZFP54
	ITM2C	NACAD			GM12592															FBXL2	ZFP58
	ITPR3	NACC2			GM12898															FBXO30	ZFP583
	IVD	NAE1			GM13554															FBXO46	ZFP59
	JADE1	NALCN			GM15542															FBXO48	ZFP607A
	JADE2	NANOS1			GM16091															FBXO5	ZFP65
	JAKMIP1	NAP1L2			GM16229															FBXO7	ZFP658
	JAKMIP2	NAP1L3			GM16344															FBXW4	ZFP661
	JCAD	NAP1L5			GM16574															FCER1A	ZFP677
	JMJD4	NAPB			GM16907															FCER1G	ZFP692
	JMJD6	NAPG			GM17041															FCER2A	ZFP708
	JMY	NAT14			GM19221															FCF1	ZFP712
	JUND	NAT8L			GM19345															FCGR1	ZFP72
	JUP	NBEA			GM19412															FCGR2B	ZFP759
	KANK3	NCALD			GM20186															FCHO1	ZFP760
	KANSL1	NCAN			GM20431															FCMR	ZFP808
	KANSL3	NCDN			GM20457															FCNA	ZFP82
	KAT2B	NCEH1			GM20481															FCNB	ZFP820
	KAT6B	NCKIPSD			GM20536															FCOR	ZFP825
	KAT8	NCMAP			GM20548															FCRL1	ZFP85
	KATNAL1	NCS1			GM21698															FCRLA	ZFP866
	KAZN	NDEL1			GM21955															FDPS	ZFP873
	KBTBD11	NDFIP1			GM21958															FDXACB1	ZFP879
	KCNA1	NDFIP2			GM21983															FECH	ZFP930
	KCNB1	NDN			GM22596															FEN1	ZFP931
	KCNE4	NDRG3			GM25082															FERMT3	ZFP933
	KCNH5	NDRG4			GM25219															FES	ZFP947
	KCNJ13	NDST4			GM26533															FFAR2	ZFP950
	KCNJ15	NDUFAF4			GM26596															FFAR4	ZFP952
	KCNQ2	NEBL			GM26635															FGD2	ZFP955A
	KCNQ3	NECAB1			GM26675															FGD3	ZFP983
	KCP	NECAB3			GM26724															FGFR1OP2	ZGPAT
	KCTD1	NECAP1			GM26809															FGR	ZKSCAN7
	KCTD10	NECTIN3			GM26819															FHDC1	ZMAT1
	KCTD13	NEFH			GM26848															FHL3	ZMYM1
	KCTD15	NEFL			GM26869															FHOD1	ZMYND8
	KCTD6	NEFM			GM26880															FIG4	ZRANB2
	KCTD9	NEO1			GM26931															FIGNL1	ZSCAN22
	KDF1	NFE2L1			GM26982															FKBP11	ZSCAN30
	KDM1A	NFIB			GM27241															FKBP15	ZSWIM3
	KDM3A	NFIX			GM28037															FLI1	0610009L18RIK
	KDM4A	NGFR			GM28192															FLNA	1110008L16RIK
	KDM8	NHLRC1			GM28285															FLOT2	1110019D14RIK
	KHDC4	NICN1			GM28592															FMNL1	1110032A03RIK
	KHNYN	NIM1K			GM28900															FMNL3	1110038F14RIK
	KIF19A	NIPSNAP1			GM28941															FMO5	1500009L16RIK
	KIF1A	NKIRAS1			GM29408															FNIP2	1600023N17RIK
	KIF1B	NKRF			GM29609															FOXM1	1700008J07RIK
	KIF1C	NLGN3			GM37123															FOXN2	1700020D05RIK
	KIF27	NMNAT2			GM37917															FOXRED2	1700030K09RIK
	KIF3B	NOG			GM38155															FPGS	1700052K11RIK
	KIF3C	NOVA1			GM38394															FPR1	1700066M21RIK
	KIFC3	NPC1			GM42031															FPR2	1700096K18RIK
	KLC3	NPDC1			GM42427															FRAT2	1700112D23RIK
	KLF11	NPEPPS			GM42428															FRG1	2310011J03RIK
	KLF15	NPPC			GM42538															FRMD4A	2310014F06RIK
	KLF9	NPR2			GM42658															FTL1	2310033P09RIK
	KLHDC10	NPR3			GM42733															FTL1-PS1	2310034G01RIK
	KLHL11	NPRL2			GM42778															FTSJ1	2500004C02RIK
	KLHL15	NPTX2			GM42793															FTX	2610306M01RIK
	KLHL21	NR1D1			GM42838															FUT11	2610306O10RIK
	KLHL24	NR1D2			GM42860															FUT4	2700012I20RIK
	KLHL34	NR2F1			GM42929															FUT7	2700049A03RIK
	KLHL42	NRG1			GM42959															FV1	2700097O09RIK
	KMT2B	NRG3			GM43029															FXN	2810006K23RIK
	KMT2D	NRIP2			GM43106															FXYD5	2810030D12RIK
	KPNA6	NRN1			GM43305															FYB	2810414N06RIK
	KRBA1	NRSN1			GM43539															FYN	2810429I04RIK
	KREMEN1	NRSN2			GM43859															FZR1	2900041M22RIK
	KRT23	NRTN			GM43912															G3BP1	3000002C10RIK
	KRTDAP	NRXN2			GM44215															GAB3	3110040N11RIK
	KSR2	NRXN3			GM44317															GAD1-PS	3110045C21RIK
	KTN1	NSF			GM44667															GALE	3222401L13RIK
	L2HGDH	NSG1			GM44954															GALK2	4632427E13RIK
	LAMA1	NSMF			GM45053															GALNT1	4930404A12RIK
	LAMA5	NTN5			GM45371															GALNT10	4930412C18RIK
	LAMB1	NTNG1			GM45410															GALNT12	4930415O20RIK
	LAMB2	NTRK2			GM45437															GALNT4	4930430F08RIK
	LANCL3	NUDT10			GM45449															GANC	4930466K18RIK
	LARGE2	NUDT11			GM45667															GAPT	4930481A15RIK
	LARP6	NUDT17			GM46212															GART	4930511M06RIK
	LAS1L	NXPE3			GM46223															GAS2L1	4930533N22RIK
	LATS1	NXT2			GM47486															GASK1B	4933431K14RIK
	LATS2	OAZ3			GM48008															GATA1	5033417F24RIK
	LBHD1	OGDHL			GM48082															GBP8	5430403G16RIK
	LBP	OLFM1			GM48161															GBX2	5930420M18RIK
	LCA5L	OLFM2			GM48269															GCH1	6330418K02RIK
	LCLAT1	OLFM3			GM48271															GCLM	6430550D23RIK
	LDB1	OLIG1			GM49004															GCN1L1	6430590A07RIK
	LDHD	OMG			GM49190															GCNT1	6720489N17RIK
	LEMD2	ONECUT2			GM49383															GCSAM	9130023H24RIK
	LENG8	OPCML			GM49708															GDA	9430002A10RIK
	LGALS4	OPRL1			GM49804															GDF3	9430025C20RIK
	LGALS8	ORMDL3			GM49890															GEMIN4	A230072C01RIK
	LGALSL	OSBP2			GM49909															GEMIN5	A230107N01RIK
	LIMA1	OSBPL1A			GM49911															GEMIN6	A430035B10RIK
	LIMS2	OSBPL6			GM6472															GEN1	A430046D13RIK
	LIN52	OSGIN2			GM7008															GFI1	A430106G13RIK
	LIN7A	OTUD1			GM7162															GFI1B	A630052C17RIK
	LINGO3	OXR1			GM9522															GGNBP2	A630089N07RIK
	LIPE	P4HA2			GM9531															GGTA1	A730017L22RIK
	LIPH	P4HTM			GM9843															GID8	A930033H14RIK
	LLGL2	PACS2			GM9869															GIMAP1	B130024G19RIK
	LMBR1L	PACSIN1			AC124174.1															GIMAP3	B230354K17RIK
	LMBRD1	PAFAH1B1																		GIMAP4	C330018D20RIK
	LMBRD2	PAIP2B																		GIMAP6	C530005A16RIK
	LMCD1	PAK1																		GIMAP7	C530008M17RIK
	LMO1	PANX2																		GIMAP8	D030056L22RIK
	LMX1A	PAQR4																		GIMAP9	D130040H23RIK
	LNCPPARA	PAQR8																		GINS1	D230017M19RIK
	LONRF1	PARD6A																		GINS3	D630024D03RIK
	LOXL3	PARM1																		GINS4	D830035M03RIK
	LPAR1	PARP6																		GIPC1	E430024I08RIK
	LRCH2	PAXBP1																		GJB3	I730030J21RIK
	LRFN4	PCBD1																		GLIPR1	GM10101
	LRIG2	PCBP4																		GLIPR2	GM10134
	LRIG3	PCDH10																		GLOD4	GM10451
	LRP1	PCDH17																		GLRX	GM10702
	LRP12	PCDH19																		GLRX5	GM10767
	LRRC18	PCDH7																		GLUD1	GM10845
	LRRC20	PCDH9																		GLYCAM1	GM11266
	LRRC27	PCDHA2																		GLYCTK	GM12744
	LRRC30	PCDHAC2																		GMDS	GM13075
	LRRC58	PCDHB11																		GMFG	GM14230
	LRRC8A	PCDHB12																		GMIP	GM14305
	LRRN4CL	PCDHB14																		GMNN	GM14391
	LURAP1	PCDHB20																		GMPPB	GM14410
	LUZP1	PCDHB3																		GMPR2	GM14412
	LY6C1	PCDHB8																		GNA12	GM14418
	LY6H	PCDHGA12																		GNA15	GM15427
	LYSMD4	PCMT1																		GNAI2	GM15443
	LYVE1	PCNP																		GNAZ	GM15506
	LZTFL1	PCNX2																		GNG2	GM15672
	LZTR1	PCNX4																		GOLGA7	GM16046
	LZTS2	PCOLCE2																		GOLM1	GM16295
	MACF1	PCP4																		GOLPH3L	GM16386
	MAD2L2	PCSK1N																		GP1BA	GM18190
	MADD	PCSK2																		GP1BB	GM19605
	MAF1	PCX																		GP5	GM20300
	MAGEF1	PDGFA																		GP6	GM20342
	MAGI3	PDHA1																		GP9	GM20390
	MAML2	PDHX																		GPAA1	GM20634
	MAMLD1	PDK2																		GPATCH3	GM20939
	MAN2A2	PDLIM5																		GPATCH4	GM2415
	MAN2C1OS	PDP1																		GPBP1	GM26621
	MANBA	PDZD4																		GPR132	GM26648
	MANSC4	PDZD7																		GPR141	GM26695
	MAP10	PEBP1																		GPR160	GM26722
	MAP1A	PEG13																		GPR171	GM26858
	MAP1LC3A	PELI3																		GPR18	GM28151
	MAP2	PER2																		GPR183	GM28424
	MAP2K7	PERP																		GPR35	GM28557
	MAP3K13	PEX11A																		GPR65	GM31024
	MAP3K20	PEX5L																		GPR84	GM32687
	MAP3K21	PFN2																		GPS2	GM32688
	MAP3K6	PGBD5																		GPSM2	GM32857
	MAP3K9	PGRMC2																		GPSM3	GM35248
	MAP4	PHF24																		GPX1	GM35339
	MAP4K4	PHLPP1																		GRAP	GM35853
	MAP6D1	PHOSPHO2																		GRAP2	GM36298
	MAP7	PHYH																		GRB2	GM37254
	MAP7D1	PHYHIP																		GREM1	GM37607
	MAPK11	PHYHIPL																		GRK2	GM37710
	MAPK12	PIANP																		GRK4	GM37893
	MAPK1IP1	PICK1																		GRK6	GM38391
	MAPK8	PIK3C3																		GRWD1	GM42517
	MAPK8IP3	PIK3R3																		GSAP	GM42688
	MAPK9	PIN1																		GSDMD	GM43042
	MAPKBP1	PINK1																		GSDME	GM43054
	MAPRE2	PIP4P2																		GSPT1	GM43205
	MARCH11	PIRT																		GSTCD	GM43667
	MARCH9	PITPNA																		GSTO1	GM43681
	MARK1	PITPNC1																		GSTP3	GM43759
	MARK3	PITPNM3																		GTDC1	GM44037
	MARK4	PJA1																		GTF2E2	GM44250
	MASP1	PJA2																		GTF2F1	GM45428
	MAST3	PJVK																		GTF2F2	GM45495
	MATN2	PKD1																		GTF3A	GM4631
	MAU2	PKP4																		GTF3C6	GM46430
	MB21D2	PLA2G4E																		GTPBP2	GM47484
	MBD1	PLA2G6																		GTPBP4	GM47644
	MBD5	PLCB1																		GUCA1A	GM48069
	MBD6	PLCG1																		GUCD1	GM49083
	MBNL2	PLCL1																		GUCY1B1	GM49274
	MBOAT1	PLCXD2																		GYPA	GM49284
	MCAM	PLD5																		GYPC	GM49331
	MCC	PLEKHA3																		GZMA	GM49359
	MCOLN1	PLEKHA4																		H2-AA	GM49519
	MDH1	PLEKHA5																		H2-AB1	GM49760
	MDM2	PLEKHB2																		H2AFX	GM49801
	MECP2	PLEKHD1																		H2AFY	GM50010
	MED12	PLEKHF1																		H2AFZ	GM5141
	MED22	PLEKHG5																		H2-D1	GM5148
	MED24	PLEKHH3																		H2-DMA	GM5165
	MED25	PLK5																		H2-DMB1	GM5577
	MEF2A	PLLP																		H2-DMB2	GM6133
	MEIS2	PLOD1																		H2-EB1	GM6710
	MEIS3	PLP1																		H2-K2	GM9821
	MERTK	PLPP7																		H2-M3	GM9856
	METTL27	PLS3																		H2-OA	GM9877
	MEX3C	PMP22																		H2-OB	GM9958
	MFAP1A	PNKD																		H2-Q4	AC149090.1
	MFAP3L	PNMA2																		H2-Q5	AC165962.3
	MFSD11	PNMAL2																		H2-Q6	AC166172.3
	MFSD6	PNPLA6																		H2-Q7	AU041133
	MFSD6L	PODXL2																		H2-T10	AW146154
	MGAT4A	POLDIP2																		H2-T24	AW209491
	MGAT4B	POPDC3																		H3F3A	BC002059
	MGAT5B	PORCN																		HAAO	BC006965
	MGLL	POU3F1																		HACD4	BC065397
	MGP	POU4F1																		HACE1	CAAA01066123.1
	MGRN1	POU4F2																		HAL
	MIA3	POU4F3																		HARS
	MICAL2	PPFIA3																		HASPIN
	MICAL3	PPFIBP2																		HAT1
	MICALL1	PPIL6																		HAUS1
	MID2	PPM1J																		HAUS4
	MIDN	PPM1K																		HAUS6
	MIEF1	PPME1																		HAUS8
	MIER2	PPP1R14C																		HBQ1A
	MINK1	PPP1R1C																		HBQ1B
	MKS1	PPP2R2B																		HCAR2
	MLLT6	PPP2R2C																		HCK
	MLXIPL	PRELID3A																		HCLS1
	MLYCD	PREPL																		HCST
	MMP14	PREX2																		HDAC1
	MMP15	PRIMA1																		HDC
	MMP2	PRKAA1																		HDGF
	MMP24	PRKAA2																		HEATR1
	MMP28	PRKACA																		HEATR5A
	MMS19	PRKAR1A																		HEATR6
	MOAP1	PRKAR1B																		HEBP1
	MOGAT1	PRKCE																		HELB
	MON2	PRKCZ																		HELLS
	MPDU1	PRKG2																		HEMGN
	MPDZ	PRNP																		HERC4
	MPG	PROX1OS																		HEXA
	MPHOSPH6	PROX2OS																		HEXB
	MPRIP	PRPF19																		HGH1
	MPV17L2	PRPF40B																		HHEX
	MPZL1	PRPSAP1																		HIRA
	MPZL2	PRR15																		HIRIP3
	MRAP	PRRT1																		HIST1H3D
	MRAS	PRRT3																		HK1
	MREG	PRUNE2																		HK2
	MRS2	PRX																		HK3
	MRTFB	PSD3																		HLCS
	MSANTD2	PSMC5																		HLX
	MSI1	PTPDC1																		HMBS
	MSI2	PTPN5																		HMGB1
	MSL3L2	PTPRN2																		HMGB1-PS8
	MSLN	PTPRR																		HMGB2
	MSRB3	PURA																		HMGB3
	MT1	PURG																		HMGN2
	MT2	PYGO1																		HMMR
	MTCL1	RAB11FIP3																		HMOX1
	MT-CO1	RAB11FIP4																		HNRNPA1
	MT-CO2	RAB11FIP5																		HNRNPA2B1
	MTFMT	RAB23																		HNRNPA3
	MTFR1L	RAB2B																		HNRNPAB
	MTHFR	RAB39B																		HNRNPC
	MTMR10	RAB3A																		HNRNPD
	MTMR2	RAB3B																		HNRNPDL
	MTMR4	RAB3C																		HNRNPF
	MT-ND5	RAB3IP																		HNRNPH1
	MTOR	RAB6A																		HNRNPK
	MTSS1	RAB6B																		HNRNPUL1
	MTURN	RAB9B																		HPGDS
	MTUS2	RABEP1																		HRH2
	MUSK	RABGAP1																		HSCB
	MXD4	RABGEF1																		HSD17B1
	MXRA7	RABL6																		HSD17B6
	MYBL1	RAC3																		HSD3B7
	MYCL	RADIL																		HSDL1
	MYLIP	RALGPS1																		HSH2D
	MYO15B	RALYL																		HSP90B1
	MYO5C	RAMP3																		HSPA14
	MYRF	RANBP6																		HSPA5
	MYSM1	RAP1GAP																		HSPBAP1
	MYT1	RAP1GDS1																		HTR2A
	MYT1L	RAPGEF3OS1																		HTRA2
	MZF1	RAPGEF4																		HVCN1
	N6AMT1	RAPGEFL1																		HYLS1
	NAPEPLD	RARRES1																		IAH1
	NARS	RASGEF1B																		IARS
	NAT8	RASGRF1																		IBA57
	NAT8F2	RASL10B																		IBSP
	NAV2	RASSF3																		IBTK
	NBEAL1	RASSF8																		ICAM2
	NBR1	RAVER2																		ICAM4
	NCAM1	RB1CC1																		IDH1
	NCAM2	RBFOX3																		IFI203
	NCK2	RBMS2																		IFI203-PS
	NCKAP1	RBMS3																		IFI204
	NCOA1	RCAN2																		IFI205
	NCOA6	RCN2																		IFI206
	NCOR2	REEP1																		IFI209
	NDOR1	RELL2																		IFI211
	NDRG2	REPS2																		IFI213
	NDST1	RESP18																		IFI47
	NDST3	RETREG1																		IFIT1BL1
	NECTIN1	RFK																		IFIT1BL2
	NECTIN4	RGMA																		IFITM6
	NEDD4	RGMB																		IFNAR2
	NEK9	RGS11																		IFNGR2
	NEMF	RGS17																		IFRD2
	NES	RGS7BP																		IFT140
	NF1	RGS8																		IGFBP4
	NF2	RHBDL1																		IGHA
	NFASC	RHBDL3																		IGHD
	NFAT5	RHOBTB2																		IGHG2B
	NFATC4	RHOBTB3																		IGHG2C
	NFE2L3	RHOT1																		IGHM
	NFIA	RIAN																		IGHV10-3
	NFKBIB	RIC8B																		IGHV1-12
	NHLRC2	RILPL1																		IGHV1-15
	NHS	RIMKLA																		IGHV1-18
	NHSL1	RIMKLB																		IGHV1-19
	NIPA1	RIMS1																		IGHV1-22
	NIPAL3	RIMS2																		IGHV12-3
	NISCH	RIMS3																		IGHV1-23
	NKAIN1	RIMS4																		IGHV1-26
	NKD2	RIPPLY2																		IGHV13-2
	NKX6-2	RIT2																		IGHV1-39
	NMT2	RITA1																		IGHV1-4
	NOL3	RND2																		IGHV14-1
	NOL4L	RNF103																		IGHV1-41
	NOL6	RNF112																		IGHV14-2
	NOM1	RNF13																		IGHV14-3
	NOP14	RNF157																		IGHV14-4
	NOS1	RNF208																		IGHV1-5
	NOS3	RNF227																		IGHV1-50
	NOTCH4	RNF43																		IGHV1-52
	NOVA2	RNFT2																		IGHV1-53
	NOX4	ROM1																		IGHV1-55
	NPHP3	RORB																		IGHV1-58
	NPLOC4	RPH3A																		IGHV1-59
	NPR1	RPP25																		IGHV1-61
	NPTX1	RPRD1A																		IGHV1-63
	NPTXR	RPS19-PS3																		IGHV1-64
	NR1H2	RPS4L																		IGHV1-69
	NRARP	RPS6KA6																		IGHV1-7
	NRBP1	RPS6KL1																		IGHV1-72
	NRBP2	RRAGB																		IGHV1-74
	NRCAM	RRM2B																		IGHV1-75
	NRIP3	RRN3																		IGHV1-77
	NRXN1	RSAD1																		IGHV1-78
	NSUN5	RSPO1																		IGHV1-80
	NSUN7	RTL8C																		IGHV1-81
	NT5C2	RTN1																		IGHV1-82
	NT5DC3	RTN4																		IGHV1-85
	NT5E	RTN4R																		IGHV1-9
	NTMT1	RTN4RL2																		IGHV2-5
	NTN4	RUBCN																		IGHV2-9-1
	NUB1	RUFY2																		IGHV3-6
	NUDT16	RUFY3																		IGHV5-12
	NUDT22	RUNDC1																		IGHV5-16
	NUMBL	RUNDC3B																		IGHV5-4
	NUP62CL	RUSC1																		IGHV5-6
	NUPR1	RWDD2A																		IGHV6-6
	NXF7	RXRA																		IGHV7-1
	NYAP1	RXRG																		IGHV7-3
	OAT	RYK																		IGHV8-12
	OAZ2	SALL1																		IGHV8-8
	OCRL	SALL2																		IGHV9-1
	ODF2	SALL3																		IGHV9-3
	ODF2L	SAPCD1																		IGHV9-4
	ODF3L2	SARM1																		IGKC
	OGA	SCAMP1																		IGKV10-94
	OGDH	SCAMP5																		IGKV10-96
	OGFOD1	SCD2																		IGKV1-110
	OLFR876	SCG2																		IGKV1-117
	OPA1	SCG3																		IGKV1-122
	OPA3	SCG5																		IGKV1-133
	OSBP	SCN1A																		IGKV1-135
	OSBPL10	SCN2B																		IGKV12-44
	OSBPL11	SCN3B																		IGKV12-46
	OSBPL2	SCN4B																		IGKV12-89
	OSBPL9	SCN8A																		IGKV12-98
	OSCP1	SCOC																		IGKV13-84
	OTOA	SCRN1																		IGKV13-85
	OTOF	SCRT1																		IGKV14-100
	OTOGL	SCRT2																		IGKV14-111
	OTUB1	SCUBE1																		IGKV15-103
	OTUD3	SDHAF3																		IGKV16-104
	OTUD7A	SDR39U1																		IGKV17-121
	OTUD7B	SEC61A2																		IGKV17-127
	OTX1	SEMA4G																		IGKV1-88
	OTX2	SEMA5B																		IGKV19-93
	OVGP1	SEMA6B																		IGKV2-109
	OVOL2	SEMA7A																		IGKV2-137
	P2RX2	SEPT4																		IGKV3-1
	P2RY2	SERINC1																		IGKV3-10
	P4HA3	SERP2																		IGKV3-12
	PABPC1L2B-PS	SERPINI1																		IGKV3-2
	PABPN1	SERTM1																		IGKV3-4
	PACSIN3	SEZ6																		IGKV3-5
	PAF1	SEZ6L2																		IGKV3-7
	PAFAH1B2	SGPP1																		IGKV4-50
	PAK3	SGPP2																		IGKV4-55
	PAKAP	SGSM1																		IGKV4-57-1
	PALD1	SGSM2																		IGKV4-58
	PALM	SGSM3																		IGKV4-59
	PALMD	SH3BGR																		IGKV4-63
	PAN2	SH3BGRL2																		IGKV4-70
	PAPLN	SH3BP5L																		IGKV4-72
	PAPPA	SH3GL2																		IGKV4-91
	PARP16	SHC4																		IGKV5-39
	PAWR	SHD																		IGKV5-43
	PAX1	SHISA4																		IGKV6-13
	PAX2	SHISA6																		IGKV6-14
	PAX3	SHISA8																		IGKV6-15
	PBX3	SHROOM1																		IGKV6-23
	PCBP3	SIX1																		IGKV6-32
	PCDHB10	SLC12A2																		IGKV8-19
	PCDHB15	SLC13A4																		IGKV8-24
	PCDHB17	SLC16A8																		IGKV8-27
	PCDHB18	SLC16A9																		IGKV8-30
	PCDHB22	SLC17A6																		IGKV9-120
	PCDHB7	SLC17A7																		IGLC1
	PCDHGA10	SLC17A8																		IGLC2
	PCDHGA11	SLC19A3																		IGLC3
	PCDHGA2	SLC1A1																		IGLL1
	PCDHGA3	SLC1A2																		IGLV1
	PCDHGA4	SLC1A6																		IGLV2
	PCDHGA6	SLC24A2																		IGLV3
	PCDHGA7	SLC25A18																		IGSF6
	PCDHGA8	SLC25A23																		IKBKE
	PCDHGA9	SLC25A25																		IKZF1
	PCDHGB1	SLC25A33																		IKZF3
	PCDHGB2	SLC25A46																		IL10RA
	PCDHGB4	SLC25A48																		IL12A
	PCDHGB5	SLC26A7																		IL13RA1
	PCDHGB6	SLC29A2																		IL13RA2
	PCDHGB7	SLC2A10																		IL15
	PCDHGC3	SLC30A9																		IL16
	PCF11	SLC35E3																		IL18R1
	PCGF2	SLC35F1																		IL18RAP
	PCGF3	SLC35F3																		IL1A
	PCID2	SLC35G2																		IL1F9
	PCLO	SLC38A1																		IL1RAP
	PCNX	SLC38A2																		IL1RL1
	PCYT1B	SLC39A12																		IL21R
	PDE4C	SLC41A1																		IL27RA
	PDE4D	SLC44A1																		IL2RA
	PDE7B	SLC49A4																		IL2RB
	PDPR	SLC6A1																		IL2RG
	PDRG1	SLC6A11																		IL3RA
	PDXK	SLC6A15																		IL7
	PDZRN3	SLC9A5																		IL7R
	PEG3	SLCO5A1																		ILK
	PELI2	SLITRK1																		IMMP2L
	PER1	SLITRK2																		IMP4
	PEX3	SLITRK3																		IMPDH2
	PEX5	SLITRK5																		INAFM2
	PFDN2	SMAD9																		INCENP
	PFKFB2	SMARCD3																		INHBA
	PGAM1-PS2	SMIM13																		INIP
	PGAP3	SMIM17																		INKA1
	PGM2L1	SMO																		INO80E
	PGM3	SMPD1																		INPP4B
	PGR	SMYD2																		INPP5A
	PHACTR1	SNAP25																		INPP5D
	PHACTR2	SNAP47																		INTS11
	PHACTR3	SNAP91																		INTS12
	PHC1	SNAPC1																		INTS5
	PHC2	SNCB																		INTS7
	PHC3	SNCG																		INTS9
	PHF13	SNHG11																		IPCEF1
	PHF2	SNHG14																		IPO5
	PHF21B	SNHG18																		IPP
	PHKA1	SNN																		IQGAP3
	PHLDA3	SNPH																		IRAK4
	PHLDB1	SNRPN																		IRF1
	PHLDB2	SNTG1																		IRF4
	PHYHD1	SNTG2																		IRF5
	PI4K2A	SNX19																		ISCA1
	PIAS2	SNX21																		ISG20
	PIAS3	SNX24																		ITGA1
	PIGS	SNX25																		ITGA2
	PIGV	SNX7																		ITGA2B
	PIH1D2	SOBP																		ITGA4
	PIK3C2A	SOCS6																		ITGA6
	PIK3CA	SORBS2																		ITGAD
	PIK3IP1	SOX11																		ITGAL
	PIM3	SOX12																		ITGAX
	PIP4K2C	SOX13																		ITGB1
	PIP5K1C	SOX5																		ITGB2
	PIP5KL1	SOX9																		ITGB2L
	PIPOX	SPAG1																		ITGB3
	PITHD1	SPARCL1																		ITGB7
	PITPNB	SPATA7																		ITK
	PITPNM2	SPIN1																		ITSN1
	PKD2	SPIRE1																		JADE3
	PLA1A	SPOCK1																		JAK1
	PLA2G3	SPOCK2																		JAK2
	PLAA	SPOCK3																		JARID2
	PLAG1	SPOP																		JCHAIN
	PLBD2	SPRED1																		JOSD1
	PLCB4	SPSB4																		JPT1
	PLCD1	SPTBN4																		JPT2
	PLCD3	SRCIN1																		KALRN
	PLCE1	SRRM3																		KAT2A
	PLCH1	SRSF12																		KATNA1
	PLCH2	SS18L1																		KBTBD6
	PLCXD3	SSC5D																		KBTBD8
	PLD1	ST5																		KCNJ5
	PLD2	ST8SIA3																		KCNK13
	PLEKHA1	ST8SIA5																		KCNK6
	PLEKHA6	STAC2																		KCNN4
	PLEKHA7	STAU2																		KCTD20
	PLEKHA8	STIM2																		KDM1B
	PLEKHB1	STK32A																		KDM2B
	PLEKHG1	STK32C																		KDM5C
	PLEKHG6	STK36																		KEL
	PLEKHH1	STMN2																		KHDRBS1
	PLEKHM2	STRA6																		KIF11
	PLEKHM3	STRIP2																		KIF14
	PLEKHS1	STX12																		KIF15
	PLIN4	STX1B																		KIF17
	PLK2	STXBP1																		KIF18A
	PLPBP	STXBP6																		KIF18B
	PLPP1	SULT4A1																		KIF20A
	PLPPR2	SUSD2																		KIF20B
	PLPPR4	SUSD4																		KIF21B
	PLSCR2	SV2A																		KIF22
	PLXNA1	SV2B																		KIF23
	PLXNA3	SVOP																		KIF24
	PLXNA4	SYBU																		KIF2C
	PLXNB1	SYNA																		KIF4
	PLXNB2	SYNGR1																		KIF9
	PM20D2	SYNGR3																		KIFC1
	PMEL	SYNJ2																		KIFC5B
	PMM1	SYNM																		KLF1
	PNISR	SYP																		KLF16
	PNPLA2	SYT1																		KLF8
	PNPLA8	SYT11																		KLHL25
	PNRC1	SYT12																		KLHL6
	POFUT2	SYT13																		KLK1
	POGK	SYT2																		KLK8
	POLDIP3	SYT3																		KLRA13-PS
	POLK	SYT7																		KLRA17
	POLM	SYTL2																		KLRA2
	POLR2A	TAC1																		KLRA7
	POLR2M	TAF13																		KLRB1C
	POLR3E	TAFA2																		KLRB1F
	POLR3G	TAFA5																		KLRC1
	POMT2	TAGLN3																		KLRD1
	POP4	TBC1D12																		KLRE1
	POR	TBC1D16																		KLRK1
	POU2F3	TBC1D17																		KMO
	POU3F4	TBC1D30																		KMT5A
	POU6F1	TCEA2																		KMT5C
	PPARA	TCEAL1																		KNG1
	PPARGC1A	TCEAL5																		KNL1
	PPFIBP1	TCEAL6																		KNSTRN
	PPM1A	TCERG1L																		KNTC1
	PPM1B	TDRD12																		KPNA2
	PPM1H	TDRKH																		KPNB1
	PPP1R12B	TDRP																		KRI1
	PPP1R13B	TEF																		KRR1
	PPP1R2	TENM2																		KRT83
	PPP1R27	TENM3																		LACTB
	PPP1R3F	TEX33																		LAG3
	PPP2R1A	TFB2M																		LAIR1
	PPP2R3A	TFCP2L1																		LAMB3
	PPP2R5B	TFG																		LANCL2
	PPP2R5D	TGOLN1																		LAPTM5
	PPP2R5E	TH																		LARP1B
	PPP3CC	THEM6																		LARP7
	PPP4R1L-PS	THNSL1																		LAT
	PPP6R2	THRA																		LAT2
	PPTC7	THSD7B																		LAX1
	PQLC2	TLCD1																		LBR
	PRAMEF8	TLL1																		LBX2
	PRCC	TM6SF2																		LCK
	PRDM16	TMC1																		LCN2
	PRDM2	TMC7																		LCP1
	PRDM5	TMEFF1																		LCP2
	PRG4	TMEM106B																		LDHA
	PRICKLE2	TMEM108																		LEO1
	PRKAR2A	TMEM121																		LFNG
	PRKCI	TMEM130																		LGALS3
	PROCR	TMEM132C																		LGALS9
	PRODH	TMEM136																		LHPP
	PROSER1	TMEM145																		LIG1
	PROX1	TMEM147OS																		LILR4B
	PRR14	TMEM150C																		LILRA5
	PRR16	TMEM151A																		LILRA6
	PRR36	TMEM151B																		LILRB4A
	PRRC1	TMEM169																		LIMD2
	PRRC2B	TMEM17																		LIMS1
	PRRG2	TMEM170																		LIN28A
	PRRG3	TMEM177																		LIN54
	PRRT2	TMEM181A																		LIN9
	PRSS23OS	TMEM181C-PS																		LIPA
	PRSS33	TMEM184C																		LIPT2
	PRSS36	TMEM196																		LLPH
	PRSS41	TMEM198																		LMAN2
	PRXL2C	TMEM200C																		LMF2
	PSMC6	TMEM204																		LMNB1
	PSMD1	TMEM222																		LMNB2
	PSMD11	TMEM229A																		LMO2
	PSMD12	TMEM231																		LOCKD
	PSMD2	TMEM240																		LOXL1
	PSMD3	TMEM246																		LPAR5
	PTAR1	TMEM25																		LPAR6
	PTBP2	TMEM252																		LPCAT1
	PTCD1	TMEM266																		LPCAT2
	PTCH1	TMEM30A																		LPCAT3
	PTGFRN	TMEM35A																		LPL
	PTK2	TMEM47																		LRMP
	PTMS	TMEM59L																		LRR1
	PTPN14	TMEM63B																		LRRC29
	PTPN21	TMEM65																		LRRC40
	PTPN3	TMEM74																		LRRFIP1
	PTPN9	TMEM74B																		LRRFIP2
	PTPRF	TMPRSS5																		LRRK2
	PTPRN	TMPRSS7																		LRWD1
	PTPRU	TMTC1																		LSM10
	PTTG1IP	TMTC2																		LSM2
	PXDC1	TMUB1																		LSM4
	QPCTL	TMX2																		LSM8
	QSER1	TNFAIP6																		LSMEM2
	QSOX1	TNNC1																		LSP1
	R3HCC1	TOGARAM1																		LST1
	RAB11FIP1	TOM1L2																		LTA4H
	RAB11FIP2	TOMM20																		LTB
	RAB12	TPBGL																		LTB4R1
	RAB15	TPPP																		LTBP2
	RAB18	TRAM1L1																		LTF
	RAB20	TRAPPC13																		LTV1
	RAB22A	TRHDE																		LUC7L2
	RAB25	TRIB2																		LY6A2
	RAB33A	TRIM2																		LY6C2
	RAB34	TRIM23																		LY6D
	RAB3GAP1	TRIM32																		LY6G
	RAB40C	TRIM37																		LY6G5B
	RAB5A	TRIM62																		LY6G6F
	RAB7	TRIM67																		LY6K
	RAF1	TRIM8																		LY75
	RALGAPB	TRIM9																		LY86
	RALGDS	TRNP1																		LY9
	RAPGEF2	TRO																		LYAR
	RAPGEF3OS2	TRP53COR1																		LYL1
	RARB	TRPC1																		LYN
	RASAL2	TRPM3																		LYRM7
	RASD1	TSHZ2																		LYZ2
	RASD2	TSPAN11																		M1AP
	RASEF	TSPAN17																		M6PR
	RASGEF1A	TSPAN7																		MAD1L1
	RASGRP1	TSPYL4																		MAD2L1
	RASIP1	TSPYL5																		MAD2L1BP
	RASSF9	TTC17																		MAEA
	RBAK	TTC19																		MAGOH
	RBBP6	TTC39A																		MAGOHB
	RBFOX1	TTC7B																		MAN1A
	RBFOX2	TTC9B																		MAN1C1
	RBL2	TTL																		MAN2B2
	RBM18	TTLL1																		MANF
	RBM20	TTLL7																		MAP2K1
	RBM24	TUB																		MAP3K11
	RBM33	TUBB4A																		MAP3K15
	RBM47	TUBG2																		MAP3K5
	RBMX	TUSC2																		MAP4K1
	RBP4	TVP23A																		MAP4K2
	RBPMS	TWIST1																		MAPK13
	RBSN	TXNDC16																		MAPK14
	RCAN1	TYMP																		MAPKAPK3
	RCAN3	TYW3																		MAPRE1
	RCBTB1	UBA3																		MARCH1
	RCOR3	UBE2W																		MARCH3
	RDH10	UBE3A																		MARCH5
	REEP2	UBE3C																		MARCH8
	REM2	UBE4B																		MARS
	REPIN1	UBL3																		MASTL
	REPS1	UBQLN1																		MATK
	RERE	UBQLN2																		MAX
	REST	UBR3																		MAZ
	RET	UGT8A																		MBD2
	REXO4	UHMK1																		MBNL1
	RGS6	UNC5A																		MBNL3
	RGS7	UNC5C																		MC5R
	RHBDD2	UPK3BL																		MCEMP1
	RHBDF1	UQCC1																		MCM10
	RHOB	USH1G																		MCM2
	RHOD	USP2																		MCM3
	RHOJ	USP20																		MCM3AP
	RHOQ	USP48																		MCM4
	RHOT2	UST																		MCM5
	RIC1	UTRN																		MCM6
	RIC3	VAMP1																		MCM7
	RICTOR	VAMP2																		MCM8
	RIMBP2	VAT1L																		MCOLN2
	RIN2	VCPKMT																		MCPH1
	RIPK4	VIPAS39																		MCPT8
	RIPOR1	VIPR1																		MCTP1
	RMND5A	VMA21																		MCTS1
	RNASE4	VPS41																		MCU
	RNF122	VPS4A																		MDN1
	RNF14	VSNL1																		ME2
	RNF146	VSTM2A																		MED11
	RNF149	VSTM2L																		MED27
	RNF168	VWA1																		MED29
	RNF169	VWA5B2																		MED6
	RNF170	VWA7																		MEFV
	RNF181	WASF1																		MELK
	RNF185	WASF3																		MEMO1
	RNF214	WASL																		MEOX1
	RNF217	WDFY1																		METAP2
	RNF220	WDR17																		METTL1
	RNF25	WDR34																		METTL15
	RNF39	WDR54																		METTL2
	RNF41	WDR7																		METTL23
	RNF6	WFDC1																		METTL9
	RNPC3	WHRN																		MFNG
	RO60	WIPF3																		MFSD12
	ROBO1	WNK2																		MFSD14B
	ROBO4	WRB																		MFSD2B
	ROCK2	WRNIP1																		MFSD7A
	RORA	YAE1D1																		MGAM
	RORC	YES1																		MGAT1
	RPAIN	YPEL1																		MGL2
	RPL19-PS11	YWHAE																		MGMT
	RPRD2	YWHAG																		MGST2
	RPUSD1	ZBTB4																		MGST3
	RTCA	ZBTB8B																		MIA2
	RTF1	ZC2HC1A																		MICAL1
	RTKN	ZC3H12B																		MICALL2
	RTL5	ZCCHC18																		MICU2
	RUNDC3A	ZCCHC3																		MILR1
	RUSC2	ZDHHC1																		MINPP1
	RWDD3	ZDHHC2																		MIOS
	RXYLT1	ZFHX3																		MIR17HG
	RYR2	ZFP105																		MIRT1
	RYR3	ZFP2																		MIRT2
	S100PBP	ZFP251																		MIS12
	S1PR1	ZFP286																		MIS18A
	SAC3D1	ZFP30																		MIS18BP1
	SACS	ZFP354C																		MKI67
	SAMD10	ZFP358																		MKNK1
	SAMD4B	ZFP369																		MKRN1
	SAMD8	ZFP383																		MLH1
	SASH1	ZFP385A																		MLLT1
	SBDS	ZFP385C																		MMADHC
	SBK1	ZFP446																		MMP12
	SBSN	ZFP467																		MMP16
	SCAF1	ZFP503																		MMP25
	SCAF4	ZFP521																		MMRN1
	SCAI	ZFP532																		MMS22L
	SCAP	ZFP536																		MND1
	SCARA5	ZFP607B																		MNDAL
	SCARB2	ZFP612																		MNS1
	SCD3	ZFP629																		MOB1A
	SCIN	ZFP711																		MOB3A
	SCMH1	ZFP788																		MOB3C
	SCN1B	ZFP791																		MOGAT2
	SCN2A	ZFP799																		MOGS
	SCNN1A	ZFP827																		MORC3
	SCNN1B	ZFP941																		MORN5
	SCO2	ZFP955B																		MORRBID
	SCPEP1	ZFPM2																		MOSPD3
	SCRG1	ZFR2																		MPEG1
	SCUBE3	ZFYVE28																		MPIG6B
	SCYL1	ZMAT4																		MPL
	SEC14L1	ZMYND10																		MPLKIP
	SEC14L5	ZMYND11																		MPO
	SEC16A	ZRSR1																		MPP1
	SEC22A	ZSWIM1																		MPPE1
	SEC23A	ZSWIM8																		MPST
	SEC24A	0610010F05RIK																		MRC1
	SEC31A	1110002L01RIK																		MRE11A
	SECISBP2L	1110032F04RIK																		MRGPRA2B
	SEL1L	1110065P20RIK																		MRI1
	SEL1L3	1500004A13RIK																		MROH2A
	SELENBP2	1500009C09RIK																		MRPL1
	SEMA3C	1700008O03RIK																		MRPL15
	SEMA3F	1700019D03RIK																		MRPL17
	SEMA3G	1700030C10RIK																		MRPL18
	SEMA4C	1700048O20RIK																		MRPL19
	SEMA4F	1700063D05RIK																		MRPL22
	SENP5	1810028F09RIK																		MRPL23
	SEPT3	2010001A14RIK																		MRPL3
	SERAC1	2310058D17RIK																		MRPL30
	SESN1	2610008E11RIK																		MRPL33
	SESN2	2610301B20RIK																		MRPL40
	SESN3	2700033N17RIK																		MRPL47
	SESTD1	2810029C07RIK																		MRPS17
	SETD1A	2810410L24RIK																		MRPS18C
	SETD6	2900009J06RIK																		MRPS24
	SETD7	2900011O08RIK																		MRPS26
	SETMAR	2900089D17RIK																		MRTFA
	SFRP1	2900097C17RIK																		MRTO4
	SFRP5	3110039M20RIK																		MRVI1
	SFT2D3	4632415L05RIK																		MS4A1
	SFXN2	4632428C04RIK																		MS4A14
	SFXN3	4732491K20RIK																		MS4A2
	SGCB	4833439L19RIK																		MS4A3
	SGIP1	4930447C04RIK																		MS4A4B
	SGTB	4930451G09RIK																		MS4A4C
	SH2B1	4930474H06RIK																		MS4A6B
	SH2D6	4930480K23RIK																		MS4A6C
	SH3D21	4930563E22RIK																		MS4A7
	SH3RF1	4931428F04RIK																		MSH5
	SHANK1	4933428G20RIK																		MSH6
	SHC1	4933431E20RIK																		MSL2
	SHC2	5033430I15RIK																		MSRA
	SHE	5330417C22RIK																		MTA2
	SHH	5730409E04RIK																		MTBP
	SHISA7	5730414N17RIK																		MTERF1A
	SHISAL1	5730455P16RIK																		MTERF1B
	SHOX2	6330409D20RIK																		MTERF3
	SHROOM2	6430571L13RIK																		MTFR1
	SIAH1A	6720427I07RIK																		MTFR2
	SIAH3	8430432A02RIK																		MTG1
	SIDT2	9030407P20RIK																		MTHFD1
	SIK1	9330102E08RIK																		MTHFD1L
	SIK3	9330159F19RIK																		MTHFD2
	SIMC1	9330182L06RIK																		MTMR14
	SIPA1L1	9430085M18RIK																		MTO1
	SIRT6	9530056K15RIK																		MTREX
	SIX4	A030001D20RIK																		MTRF1L
	SKI	A230001M10RIK																		MTRR
	SKOR1	A230057D06RIK																		MUC13
	SLC10A6	A330048O09RIK																		MVB12B
	SLC12A4	A330102I10RIK																		MVK
	SLC12A7	A530058N18RIK																		MXD1
	SLC17A5	A730020E08RIK																		MXD3
	SLC19A2	A730056A06RIK																		MYB
	SLC1A3	A830018L16RIK																		MYBL2
	SLC1A4	A830082N09RIK																		MYC
	SLC20A2	A930004D18RIK																		MYCT1
	SLC22A21	A930012L18RIK																		MYL12A
	SLC22A5	A930017M01RIK																		MYL6
	SLC23A2	B230206H07RIK																		MYLK
	SLC25A16	B230217O12RIK																		MYLK3
	SLC25A20	B230312C02RIK																		MYO1F
	SLC25A22	C030006K11RIK																		MYO1G
	SLC25A27	C030015A19RIK																		MYO9B
	SLC25A28	C030037D09RIK																		MZB1
	SLC25A29	C130046K22RIK																		NAA10
	SLC25A30	C230004F18RIK																		NAA15
	SLC25A34	D030045P18RIK																		NAA60
	SLC25A42	D130009I18RIK																		NAAA
	SLC25A47	D130043K22RIK																		NACA
	SLC27A1	D430040D24RIK																		NADK
	SLC2A1	D830026I12RIK																		NADK2
	SLC30A2	D830039M14RIK																		NAGPA
	SLC30A4	E030037K01RIK																		NAIF1
	SLC31A1	E130114P18RIK																		NAIP2
	SLC35D1	AC109138.11																		NAIP5
	SLC35E2	AC115893.1																		NAIP6
	SLC35E4	AC122442.1																		NANS
	SLC36A4	AC127249.1																		NAP1L1
	SLC38A7	AC156546.1																		NAP1L4
	SLC39A13	AA414768																		NAPSA
	SLC39A14	AL607088.1																		NASP
	SLC39A3	GM6297																		NAT2
	SLC3A2	GM765																		NBAS
	SLC41A2	GM7818																		NBEAL2
	SLC44A4	GM8239																		NBN
	SLC45A1	GM960																		NCAPD2
	SLC45A3	GM9747																		NCAPD3
	SLC4A3	GM9754																		NCAPG
	SLC4A4	GM9812																		NCAPG2
	SLC4A8	GM9866																		NCAPH
	SLC52A3	GM10125																		NCAPH2
	SLC6A17	GM10244																		NCBP1
	SLC6A8	GM10419																		NCF1
	SLC7A14	GM10605																		NCF2
	SLC7A2	GM10684																		NCF4
	SLC7A6	GM10699																		NCKAP1L
	SLC7A8	GM11650																		NCOA7
	SLC9A1	GM11696																		NDC1
	SLC9A3	GM11870																		NDC80
	SLC9A7	GM12264																		NECAP2
	SLCO1A4	GM12276																		NEDD1
	SLCO1A5	GM12905																		NEDD9
	SLCO3A1	GM12963																		NEIL3
	SLCO4A1	GM13068																		NEK2
	SMAD1	GM13629																		NELFA
	SMAD4	GM13716																		NELFE
	SMAD7	GM13861																		NEMP1
	SMARCC2	GM14295																		NEURL1B
	SMARCD1	GM14419																		NEURL3
	SMKR-PS	GM14703																		NFAM1
	SMYD4	GM14827																		NFATC2IP
	SNAI1	GM15471																		NFE2
	SNHG20	GM15497																		NFKB1
	SNHG8	GM15543																		NFKBID
	SNTB2	GM15706																		NFKBIE
	SNX33	GM15912																		NFU1
	SOCS2	GM15952																		NFXL1
	SOCS5	GM16042																		NGP
	SOCS7	GM16168																		NHEJ1
	SOGA3	GM16276																		NHP2
	SORBS1	GM16499																		NIFK
	SORBS3	GM16551																		NINL
	SOS1	GM16617																		NIP7
	SOS2	GM16794																		NKG7
	SOWAHB	GM17396																		NLE1
	SOX1	GM17641																		NLN
	SOX10	GM19439																		NLRC3
	SOX7	GM19531																		NLRC4
	SP5	GM2011																		NLRC5
	SPACA6	GM20387																		NLRP12
	SPAG9	GM20635																		NLRP3
	SPATA6	GM22637																		NME2
	SPATS2	GM26540																		NME6
	SPEF1	GM26606																		NMNAT3
	SPG20	GM26690																		NMRAL1
	SPG21	GM26702																		NOA1
	SPHKAP	GM26723																		NOB1
	SPIN4	GM26782																		NOC2L
	SPINDOC	GM26883																		NOC4L
	SPINT2	GM26910																		NOD1
	SPP1	GM26953																		NOL10
	SPR	GM26964																		NOL11
	SPRED2	GM27032																		NOL7
	SPRED3	GM27202																		NOL9
	SPRY1	GM28221																		NOLC1
	SPRY4	GM2885																		NOMO1
	SPRYD3	GM29170																		NONO
	SPRYD7	GM29543																		NOP16
	SPSB1	GM2986																		NOP2
	SPSB3	GM30025																		NOP56
	SPTAN1	GM3055																		NOP58
	SPTBN1	GM32618																		NPAS4
	SPTBN2	GM34653																		NPC2
	SQSTM1	GM35021																		NPL
	SRARP	GM3636																		NPM1
	SREK1	GM36995																		NPM3
	SRGAP3	GM37422																		NRBF2
	SRPR	GM3764																		NRF1
	SRPRB	GM37795																		NRGN
	SRRM2	GM37885																		NRM
	SRRM4	GM38279																		NRROS
	SSH3	GM38336																		NSA2
	SSPO	GM3854																		NSD2
	SSU72	GM38604																		NSL1
	ST8SIA1	GM38910																		NSMCE1
	ST8SIA2	GM40841																		NSUN2
	STAM	GM42067																		NT5C
	STAMBP	GM42433																		NT5C3
	STAR	GM42504																		NT5DC1
	STARD13	GM42732																		NUBP1
	STARD5	GM42840																		NUBP2
	STC1	GM43012																		NUCB2
	STEAP2	GM43034																		NUDCD1
	STIM1	GM43190																		NUDT1
	STK11IP	GM43398																		NUDT15
	STK25	GM43480																		NUDT19
	STK35	GM43592																		NUDT21
	STK38L	GM43597																		NUDT5
	STMN4	GM43808																		NUF2
	STON1	GM44231																		NUFIP1
	STOX1	GM44243																		NUP107
	STOX2	GM44623																		NUP160
	STRBP	GM44645																		NUP188
	STRIP1	GM44646																		NUP205
	STRN3	GM44763																		NUP210
	STRN4	GM45094																		NUP37
	STX17	GM45102																		NUP43
	STX3	GM45447																		NUP54
	STXBP5L	GM45564																		NUP62
	SULF2	GM45605																		NUP85
	SULT1E1	GM45629																		NUSAP1
	SUPT5	GM45767																		NUTF2
	SUSD6	GM45768																		NVL
	SV2C	GM45769																		NXN
	SYCP3	GM45844																		NXPE1-PS
	SYDE1	GM45847																		NXPE2
	SYDE2	GM45869																		NXPE4
	SYMPK	GM45881																		NXT1
	SYN1	GM45904																		OAF
	SYN2	GM47155																		OAS2
	SYNDIG1	GM47163																		OAS3
	SYNE4	GM47483																		OAZ1-PS
	SYNGAP1	GM47571																		OIP5
	SYNJ1	GM47956																		OLFM4
	SYNPO	GM48512																		OLFR289-PS1
	SYT14	GM48697																		OLFR56
	SYT4	GM48796																		OLFR90
	TACC1	GM48949																		OLR1
	TACC2	GM49668																		OPTN
	TADA2B	GM49769																		ORAI1
	TAF3																			ORC1
	TAF9B																			ORC2
	TANC1																			ORC5
	TANC2																			ORC6
	TAOK1																			ORM1
	TBC1D10A																			ORMDL1
	TBC1D22B																			OSBPL8
	TBC1D24																			OSGEP
	TBC1D9																			OSM
	TBC1D9B																			OSTC
	TBCE																			OTUB2
	TBX2																			OTUD5
	TBX3																			OTULIN
	TBX3OS1																			OTULINL
	TBX6																			P2RX1
	TCAF1																			P2RY1
	TCAF2																			P2RY10
	TCF4																			P2RY10B
	TCF7L1																			P2RY12
	TCFL5																			P2RY13
	TCHH																			P2RY14
	TCIM																			P2RY6
	TCP11L1																			P3H2
	TCTN3																			P4HB
	TEAD1																			PA2G4
	TEAD3																			PABPC1
	TECPR1																			PABPC4
	TECPR2																			PADI4
	TECTA																			PAFAH1B3
	TEKT2																			PAG1
	TERF2																			PALB2
	TEX26																			PALLD
	TEX264																			PAMR1
	TGFA																			PANCT2
	TGFB2																			PAOX
	TGFBR2																			PAPOLA
	TGFBR3																			PAQR9
	TGFBRAP1																			PARG
	THPO																			PARP1
	THSD1																			PARP2
	THSD7A																			PARPBP
	THYN1																			PARVB
	TICAM1																			PARVG
	TIGD2																			PASK
	TIGD5																			PAX5
	TIMP2																			PBDC1
	TIMP3																			PBK
	TIMP4																			PBX4
	TIRAP																			PCBP1
	TJAP1																			PCDH12
	TJP1																			PCED1B
	TJP3																			PCIF1
	TLCD2																			PCK2
	TLR4																			PCLAF
	TMC4																			PCNA
	TMCO4																			PDCD10
	TMED7																			PDCD2
	TMED8																			PDCD2L
	TMEM100																			PDCL3
	TMEM102																			PDE2A
	TMEM104																			PDE3A
	TMEM115																			PDE3B
	TMEM120A																			PDE5A
	TMEM127																			PDE7A
	TMEM132E																			PDGFB
	TMEM139																			PDIA2
	TMEM150A																			PDIA3
	TMEM178B																			PDIA4
	TMEM179																			PDIA5
	TMEM18																			PDIA6
	TMEM181B-PS																			PDIK1L
	TMEM183A																			PDLIM1
	TMEM184A																			PDLIM4
	TMEM184B																			PDS5A
	TMEM189																			PDSS1
	TMEM19																			PDZK1IP1
	TMEM198B																			PDZRN4
	TMEM203																			PF4
	TMEM245																			PFAS
	TMEM248																			PFKFB1
	TMEM30B																			PFKFB4
	TMEM43																			PFN1
	TMEM45A																			PGD
	TMEM51OS1																			PGGHG
	TMEM54																			PGLS
	TMEM62																			PGLYRP1
	TMEM63A																			PHB
	TMEM63C																			PHB2
	TMEM72																			PHETA2
	TMEM82																			PHF10
	TMEM87B																			PHF11A
	TMEM88B																			PHF11B
	TMEM8B																			PHF11C
	TMEM98																			PHF19
	TMF1																			PHF5A
	TMOD1																			PHLDB3
	TMOD2																			PHOSPHO1
[truncated: 1,535 more rows]

## Sheet: Sheet 3
Supplemental Table 3. The correlation of ME values for each module between three types of SNHL models.
Module	R value
	Aging vs noise	Aging vs cisplatin	Noise vs cisplatin	Averaged R
M7	0.982972	0.963365	0.897679	0.948005
M13	0.919187	0.999907	0.913742	0.944279
M4	0.931723	0.988946	0.867575	0.929415
M3	0.949653	0.856643	0.651878	0.819392
M1	0.786225	0.435682	0.898753	0.706886
M8	0.385274	0.998382	0.332178	0.571945
M18	0.997554	0.352243	0.285959	0.545252
M20	0.494444	0.183564	0.945202	0.54107
M10	0.163998	0.504214	0.934577	0.534263
M17	0.446212	0.924105	0.07036	0.480226
M6	0.338572	0.105777	0.971475	0.471941
M16	-0.0406206	0.750274	0.630105	0.446586
M9	-0.0919847	0.985183	0.0801559	0.324452
M11	-0.0635421	0.994453	0.0417756	0.324229
M12	0.0498518	-0.665127	0.712644	0.0324563
M14	-0.537433	0.99873	-0.579239	-0.039314
M5	-0.918332	-0.18998	0.563067	-0.181748
M22	-0.944451	0.647164	-0.360667	-0.219318
M2	-0.951011	-0.728488	0.90459	-0.258303
M19	-0.905117	-0.918917	0.999433	-0.274867
M21	0.949861	-0.998752	-0.96429	-0.337727
M15	-0.91562	0.875002	-0.995807	-0.345475

## Sheet: Sheet 4
Supplemental Table 4. The GO enrichment analysis for the genes within M4.
GO terms	Description	P value*	FDR	Involved genes
GO:0002376	immune system process	3.61024e-06	0.00533955	NLRX1, CLEC4N, CRTAM, H2-K1, HP, BCL10, MST1R, CFP, IFI30, DCSTAMP, CLEC4D, CR1L, TLR6, CLEC4E, CD300LF, SERINC3, JAK3, MYD88, H2-Q10, TLR13
GO:0006954	inflammatory response	4.66622e-05	0.0275679	CCR1, GGT5, C5AR2, TNFRSF9, C5AR1, CCL9, IL1B, MAPKAPK2, CCRL2, SDC1, ADAM8, CHIL3, TLR6, TNFRSF4, MYD88, TLR13, CRLF2
GO:0030316	osteoclast differentiation	5.59188e-05	0.0275679	DCSTAMP, OSTM1, NFATC1, SNX10, TNFRSF11A, CD300LF
GO:0030593	neutrophil chemotaxis	0.000498029	0.184146	FCGR3, CCL9, ITGAM, IL1B, C5AR1, CXCR2, TREM1
GO:0050900	leukocyte migration	0.00143918	0.354758	B4GALT1, IL1B, C5AR2, MSN, MMP9
GO:0050715	positive regulation of cytokine secretion	0.00143918	0.354758	PTGER4, RGCC, CLEC4N, CRTAM, CLEC4E
GO:0042590	antigen processing and presentation of exogenous peptide antigen via MHC class I	0.0020474	0.398856	FCGR3, H2-K1, IFI30
GO:0006955	immune response	0.00219164	0.398856	CCR1, CCL9, IGKV5-48, IL1B, TNFRSF9, H2-K1, TLR6, TNFRSF11A, CLEC4E, TNFRSF4, MYD88, IGKV2-112
GO:0032496	response to lipopolysaccharide	0.00242712	0.398856	PTGER4, IL1B, TNFRSF9, C5AR1, MAPKAPK2, MGST1, ACP5, TNFRSF11A, TNFRSF4, MYD88
GO:0030574	collagen catabolic process	0.00491165	0.590173	CTSK, MMP19, MMP8, MMP9
GO:0051092	positive regulation of NF-kappaB transcription factor activity	0.00520166	0.590173	IKBKB, PRKCH, IL1B, ADAM8, BCL10, TNFRSF11A, MYD88
GO:0045453	bone resorption	0.0055221	0.590173	CTSK, ACP5, RAC1, XDH
GO:0006749	glutathione metabolic process	0.0055475	0.590173	GGT5, G6PDX, GSR, MGST1, GGT1
GO:0045087	innate immune response	0.00586436	0.590173	NLRX1, CLEC4N, BCL10, MST1R, CFP, CLEC4D, CR1L, TLR6, CLEC4E, SERINC3, JAK3, TRIM11, MYD88, TLR13
GO:0007204	positive regulation of cytosolic calcium ion concentration	0.00598552	0.590173	CCR1, PTGER4, IL1B, C5AR2, C5AR1, CXCR2, JAK3, KNG2
GO:0006935	chemotaxis	0.00760203	0.662736	CCR1, CCL9, C5AR2, C5AR1, CCRL2, CXCR2, RAC1
GO:0090023	positive regulation of neutrophil chemotaxis	0.00761765	0.662736	IL1B, C5AR1, CXCR2, RAC1
GO:0010762	regulation of fibroblast migration	0.00878094	0.721501	PRR5L, RAC1, CORO1C
GO:0042254	ribosome biogenesis	0.00965375	0.751468	EBNA1BP2, EMG1, ISG20L2, MPHOSPH10, NAF1, RPF1
GO:0005975	carbohydrate metabolic process	0.0107321	0.793635	GPI1, B4GALT1, GLB1, G6PDX, MLEC, PGM2, MAN2B1, CHIL3, GUSB
GO:0071345	cellular response to cytokine stimulus	0.0120297	0.847236	DDIAS, KHSRP, JAK3, IL17RA
GO:0061014	positive regulation of mRNA catabolic process	0.0170907	1	KHSRP, PRR5L, GTPBP1
GO:0001934	positive regulation of protein phosphorylation	0.0182839	1	PTGER4, GRK3, RALB, IL1B, PLAUR, PRR5L, RAC1, MMP9
GO:0007040	lysosome organization	0.0189095	1	FAM160A2, CLN8, TPCN2, CLN6
GO:0050710	negative regulation of cytokine secretion	0.019533	1	PTGER4, RGCC, TNFRSF4
GO:0019221	cytokine-mediated signaling pathway	0.0200593	1	CSF2RB2, IL1RN, IFNGR1, IL1B, CSF2RB, JAK3, MYD88
GO:0043507	positive regulation of JUN kinase activity	0.0202279	1	IL1RN, IL1B, TLR6, TNFRSF11A
GO:0002755	MyD88-dependent toll-like receptor signaling pathway	0.0221119	1	TLR6, MYD88, TLR13
GO:0071356	cellular response to tumor necrosis factor	0.0223215	1	IKBKB, DCSTAMP, CCL9, OCSTAMP, ZFP36L2, KLF2
GO:0097192	extrinsic apoptotic signaling pathway in absence of ligand	0.0230129	1	IL1B, BCL2A1A, BCL2A1B, MCL1
GO:0000398	mRNA splicing, via spliceosome	0.0239093	1	HNRNPM, SART3, RAVER1, DDX39B, LSM5, LSM3
GO:0006968	cellular defense response	0.024823	1	CXCR2, BCL10, TNFRSF4
GO:0008380	RNA splicing	0.0250543	1	RBM39, HNRNPM, SFPQ, SART3, DDX39B, KHSRP, USB1, LSM5, LSM3
GO:0042981	regulation of apoptotic process	0.0266907	1	RASSF2, APAF1, TNFRSF9, BCL10, TNFRSF11A, BCL2A1A, TNFRSF4, MCL1
GO:0071260	cellular response to mechanical stimulus	0.0269891	1	PTGER4, IL1B, RAC1, BCL10, GGT1
GO:0050712	negative regulation of interleukin-1 alpha secretion	0.0288789	1	PTGER4, IL1R2
GO:0045766	positive regulation of angiogenesis	0.0319468	1	LRG1, ANXA3, IL1B, C5AR1, CXCR2, MMP9
GO:0050766	positive regulation of phagocytosis	0.0325512	1	SIRPB1A, FCGR3, IL1B, ABCA7
GO:0045780	positive regulation of bone resorption	0.0337063	1	PTGER4, DCSTAMP, ADAM8
GO:0007049	cell cycle	0.0359856	1	ANAPC15, RALB, UBE2I, DDIAS, PRKCD, SETDB2, NSMCE2, HAUS5, RASSF2, RGCC, BIN3, REEP4, CNTRL, PIM1, MCMBP, CCNO
GO:0006909	phagocytosis	0.0398854	1	ANXA3, LEPR, ABCA7, CORO1C
GO:0016064	immunoglobulin mediated immune response	0.040212	1	PRKCD, BCL10, MYD88
GO:0050746	regulation of lipoprotein metabolic process	0.0430053	1	DGAT2, LIPG
GO:0044265	cellular macromolecule catabolic process	0.0430053	1	CLN8, CLN6
GO:0038094	Fc-gamma receptor signaling pathway	0.0430053	1	CLEC4D, CLEC4E
GO:2000660	negative regulation of interleukin-1-mediated signaling pathway	0.0430053	1	IL1RN, IL1R2
GO:0072537	fibroblast activation	0.0430053	1	RGCC, IL17RA
GO:0045833	negative regulation of lipid metabolic process	0.0430053	1	IL1B, APOC2
GO:0034241	positive regulation of macrophage fusion	0.0430053	1	DCSTAMP, OCSTAMP
GO:0006508	proteolysis	0.0458536	1	GGT5, CTSA, CTSZ, HP, PRSS16, TYSND1, SRI, MMP8, ASPRV1, MMP9, CTSK, RNPEP, MMP19, ADAM8, GGT1
GO:0030041	actin filament polymerization	0.0471477	1	DIAPH1, MYH9, RAC1
GO:0008361	regulation of cell size	0.0471477	1	MSN, RAC1, CLN8
GO:0051301	cell division	0.0476887	1	UBE2I, ANAPC15, BIN3, RALB, REEP4, SETDB2, NSMCE2, CNTRL, MCMBP, HAUS5, CCNO

## Sheet: Sheet 5
Supplemental Table 5. The GO enrichment analysis for the genes within M13.
GO terms	Description	P value*	FDR	Involved genes
GO:0006351	transcription, DNA-templated	5.24439e-15	1.13961e-11	RSC1A1, MAML1, NAB1, GABPB1, BACH1, CCAR1, YY1, EPC1, EP300, KAT7, JUNB, NFRKB, MED1, SFMBT1, CSNK2A2, ARID5A, DNTTIP2, ERN1, RFX5, TCEANC2, ZFP865, L3MBTL2, PAXIP1, BAZ2A, NPAS2, SBNO2, ATXN7, STAT5B, XBP1, SETDB1, SETD1B, EAF1, INO80, ELL2, MED13L, FOSL2, MAFB, SP2, SP4, BCL3, CNOT3, ZFP593, MAFK, ZFP110, ZMYND15, BTG2, GMEB1, GMEB2, CHD7, LIMD1, LITAF, AFF1, SIN3B, NFKBIZ, PELP1, BRD3, KLF10, …
GO:0045944	positive regulation of transcription from RNA polymerase II promoter	1.16627e-10	1.26715e-07	ARF4, GMEB1, MAML1, CHD7, GABPB1, BACH1, YY1, NIPBL, TBK1, ZC3H12A, AKT1, EPC1, EP300, JUNB, PELP1, MED1, IFRD1, ARID5A, TET2, TMEM173, SIRT1, TNFRSF1A, ETV6, PLSCR1, THRAP3, TRAF6, MTF1, IRF2, RARA, CEBPD, SRF, DOT1L, TAF9, MOSPD1, RNF4, NPAS2, ARNTL, RELB, SBNO2, MAPK7, ATXN7, STAT6, BRD8, ZFP143, STAT5B, XBP1, EAF1, STAT3, HMGA1, INO80, KLF4, FOSL2, KLF6, MAFB, TNIP1, TNIP2, BCL3, CD28, TAF2
GO:0006355	regulation of transcription, DNA-templated	1.98782e-10	1.43984e-07	RSC1A1, MAML1, NAB1, GABPB1, BACH1, CCAR1, YY1, EPC1, EP300, KAT7, JUNB, NFRKB, PDE8A, MED1, RNF44, SFMBT1, CSNK2A2, ARID5A, DNTTIP2, HCFC1, ERN1, RFX5, L3MBTL2, PAXIP1, BAZ2A, NPAS2, SBNO2, ATXN7, STAT5B, XBP1, SETDB1, SETD1B, EAF1, HMGA1, ELL2, MED13L, FOSL2, MAFB, SP2, SP4, BCL3, CNOT3, ZFP593, MAFK, ZFP110, ZMYND15, BTG2, GMEB1, GMEB2, CHD7, LIMD1, LITAF, SIN3B, NFKBIZ, BRD3, KLF10, EED, ACTR…
GO:0006915	apoptotic process	6.18491e-07	0.000335995	BRAT1, UBE2D3, TNFAIP3, PSEN1, GRAMD4, LITAF, CCAR1, SGPL1, BCLAF1, NUAK2, RNF216, ZC3H12A, AKT1, BNIP2, EP300, MAP3K8, RBM5, PLK3, XBP1, PDCD6IP, MAP1S, NEK6, CSNK2A2, IRAK3, CFLAR, TMEM173, SIRT1, TNFRSF1A, ERN1, TRAF7, PLSCR1, TNIP2, FAS, BIRC3, ZFP110
GO:0000122	negative regulation of transcription from RNA polymerase II promoter	3.60552e-06	0.00156696	BTG2, ZBTB42, MOSPD1, PSEN1, BACH1, MTDH, RELB, YY1, NIPBL, ZFP36, NFIL3, SIN3B, EPC1, EP300, STAT6, FNIP1, JUNB, MED1, PLK3, XBP1, RBM15, SETDB1, EED, USP3, KLF4, HIPK1, SIRT1, HCFC1, ETV6, GATAD2A, TRAF7, GCFC2, NCOR1, TRAF6, RFX5, RARA, BCOR, EZR, PTPN2
GO:0006974	cellular response to DNA damage stimulus	7.04083e-06	0.00243693	BTG2, PAXIP1, BRAT1, UBE2D3, SMC5, PSEN1, NPAS2, YY1, NIPBL, SLX4, ZC3H12A, REV3L, AKT1, NFRKB, UVRAG, PLK3, GADD45A, ACTR5, USP3, INO80, SIRT1, TOPORS, TRAF6, BCL3, SPRTN, ERCC8, TRIP12
GO:0006357	regulation of transcription from RNA polymerase II promoter	7.85021e-06	0.00243693	ZFP865, GMEB2, CEBPD, RELB, ZFP36, ATXN7, ELMSAN1, NFKBIZ, EPC1, JUNB, MLXIP, BRD3, MED1, STAT5B, XBP1, KLF4, MED26, FOSL2, MED13L, ELF2, MAFB, NCOR1, SP2, SP4, RFX5, MAFK
GO:0060548	negative regulation of cell death	1.68616e-05	0.00458003	MCFD2, STAT3, CHMP2A, TNFAIP3, CHMP4B, EP300, RNF4, SIRT1, NPAS2, CTSB, CABIN1
GO:0016569	covalent chromatin modification	5.90389e-05	0.0142546	BRD3, KDM3B, L3MBTL2, SETDB1, EED, SFMBT1, SETD1B, USP3, CHD7, TET2, BAZ2A, RNF40, HCFC1, NCOR1, KANSL2, EPC1, KAT7, BRD8, BCOR
GO:0007249	I-kappaB kinase/NF-kappaB signaling	8.55579e-05	0.0185917	IRAK2, TNIP2, TRAF6, BCL3, AZI2, MAP3K14, RELB
GO:0070936	protein K48-linked ubiquitination	0.00011734	0.0231799	RNF115, RNF216, UBE2D3, ARIH2, TNFAIP3, UBE2G2, RNF4, TOPORS
GO:0032088	negative regulation of NF-kappaB transcription factor activity	0.000147125	0.0266419	IRAK1, IRAK2, ZC3H12A, ERBIN, TNFAIP3, IRAK3, KLF4, SIRT1, HAVCR2
GO:0019221	cytokine-mediated signaling pathway	0.000168088	0.0280965	STAT5B, STAT3, IL6RA, IFNLR1, IRAK3, TNFRSF1A, SOCS3, KLF6, IRAK1, TRAF6, CCL2, STAT6, SH2B2
GO:0007623	circadian rhythm	0.000221967	0.0344525	KLF10, NCOR1, MAT2A, NFIL3, THRAP3, DYRK1A, FAS, EP300, SIRT1, NPAS2, ARNTL
GO:0070498	interleukin-1-mediated signaling pathway	0.000245342	0.0355418	IRAK1, IRAK2, TNIP2, TRAF6, IRAK3
GO:2000347	positive regulation of hepatocyte proliferation	0.000414814	0.056337	MED1, XBP1, TNFAIP3, CFLAR
GO:0006954	inflammatory response	0.000508274	0.0649693	MAP2K3, PXK, PTGER1, TNFAIP3, REG3G, THBS1, TNFRSF1A, RELB, IL1RL2, CCL7, TNIP1, IRAK2, TNIP2, ZC3H12A, NFKBIZ, AKT1, CCL2, FAS, TNFRSF26, HAVCR2
GO:0006397	mRNA processing	0.000618919	0.0747173	CPSF7, PRPF38B, DHX8, WBP11, IWS1, SRRM1, ERN1, GCFC2, RBM15B, LSM11, PDCD11, FIP1L1, THRAP3, CWC22, TUT1, RNPS1, CDK12, SMN1, RBM5
GO:0000209	protein polyubiquitination	0.000695244	0.079514	RNF125, TRAF6, UBE2D3, ARIH2, RNF19B, ERCC8, UBE2G2, CHFR, TOPORS, RNF111
GO:0043161	proteasome-mediated ubiquitin-dependent protein catabolic process	0.000774331	0.0801248	PPP2CB, RNF115, RNF44, RNF216, UBE2D3, RNF38, ERCC8, RNF4, SIRT1, TOPORS, RNF111, ARNTL
GO:0043123	positive regulation of I-kappaB kinase/NF-kappaB signaling	0.000774331	0.0801248	MAP3K3, TBK1, IRAK1, TNIP2, TRAF6, NEK6, TAB2, CFLAR, LITAF, MAP3K14, TNFRSF1A, MTDH
GO:0070555	response to interleukin-1	0.000818192	0.0808151	GCLC, IRAK1, IRAK2, TRAF6, TAF9, IRAK3
GO:0035855	megakaryocyte development	0.000865873	0.0818061	MED1, SRF, ABI1, EP300, WASF2
GO:0016567	protein ubiquitination	0.000941317	0.0835597	MED1, RNF44, UBE2D3, RNF38, RNF19B, TNFAIP3, CBLB, RNF4, BACH1, SIRT1, CHFR, DCAF15, TRAF7, SOCS3, HECTD1, RNF125, TRAF6, ARIH2, AKT1, RNF111
GO:0042088	T-helper 1 type immune response	0.000961341	0.0835597	NRAS, TRAF6, BCL3, RELB
GO:0006468	protein phosphorylation	0.00113168	0.0945826	PXK, MAML1, FLT4, PRKAG1, PRKX, MAPK7, NUAK2, TBK1, IRAK1, IRAK2, AKT1, MAP3K8, MAP4K5, MAPK6, MAP2K3, MAP3K3, PLK3, NEK6, CSNK2A2, DYRK1A, IRAK3, HIPK1, ERN1, GAK, RARA, CDK12, MAP3K14
GO:0071222	cellular response to lipopolysaccharide	0.00133604	0.107527	XBP1, TNFAIP3, LITAF, ICAM1, CXCL16, SBNO2, ZFP36, PLSCR1, TNIP2, TRAF6, ZC3H12A, RARA, CCL2, HAVCR2
GO:0006366	transcription from RNA polymerase II promoter	0.00152718	0.11852	STAT5B, MED1, XBP1, NFIL3, THRAP3, SRF, STAT3, KLF4, JUNB, MED13L, FOSL2
GO:0000381	regulation of alternative mRNA splicing, via spliceosome	0.00204606	0.153314	RBM15B, THRAP3, DYRK1A, RNPS1, RBM7, RBM5
GO:0045892	negative regulation of transcription, DNA-templated	0.00248759	0.180184	ZMYND15, CEBPD, NAB1, LIMD1, ARNTL, RELB, NIPBL, SBNO2, BCLAF1, IRAK1, SIN3B, EPC1, MTA3, KLF10, SFMBT1, HMGA1, KLF4, SIRT1, GATAD2A, GCLC, NCOR1, MYBBP1A, TRAF6, BCL3, RARA, BCOR
GO:0007049	cell cycle	0.00271968	0.190641	CTDP1, ZFP207, E030030I06RIK, SMC5, TRIOBP, CCAR1, NIPBL, RGS2, MAPK7, EP300, MAP3K8, MAPK6, PLK3, PDCD6IP, ANAPC7, GADD45A, USP3, NEK6, CSNK2A2, TET2, ANXA11, INO80, CHFR, HCFC1, GAK, PSRC1, ARF6
GO:0034097	response to cytokine	0.00286654	0.194656	SRF, STAT3, RARA, IL6RA, STAT6, JUNB, RELB, CXCL16
GO:0032720	negative regulation of tumor necrosis factor production	0.00316954	0.20871	ZC3H12A, RARA, TNFAIP3, IRAK3, SIRT1, HAVCR2
GO:0006310	DNA recombination	0.00375863	0.224914	YY1, SLX4, PAXIP1, ACTR5, SMC5, INO80, NFRKB, BACH1
GO:0033160	positive regulation of protein import into nucleus, translocation	0.00381845	0.224914	MED1, EP300, TMEM173, TNFRSF1A
GO:1901653	cellular response to peptide	0.00381845	0.224914	KLF10, AKT1, KLF4, KLF3
GO:0043066	negative regulation of apoptotic process	0.00382965	0.224914	ARF4, BTG2, FLT4, TAF9, PSEN1, THBS1, MTDH, SOCS3, MAPK7, NUAK2, AKT1, MED1, STAT5B, PLK3, XBP1, STAT3, CFLAR, SIRT1, TNFRSF1A, GCLC, QARS, BCL3, RARA, FAS, HYOU1
GO:0032436	positive regulation of proteasomal ubiquitin-dependent protein catabolic process	0.00408096	0.233366	GCLC, RNF125, ARIH2, AKT1, RNF19B, PSEN1, CHFR
GO:0071356	cellular response to tumor necrosis factor	0.00431433	0.240386	ZFP36, CCL7, ZC3H12A, ERBIN, CCL2, THBS1, SIRT1, BIRC3, ICAM1
GO:0045893	positive regulation of transcription, DNA-templated	0.00479173	0.258641	SRF, PSEN1, RNF4, AFF1, NPAS2, ARNTL, FGF7, EP300, RNF111, MAP2K3, MED1, BRPF1, STAT3, HMGA1, KLF4, TOPORS, FOSL2, KLF7, ELF2, PSRC1, THRAP3, MTF1, BCL3, RARA, DCP1A
GO:0032715	negative regulation of interleukin-6 production	0.00499905	0.258641	ZC3H12A, TNFAIP3, IRAK3, TNFRSF1A, HAVCR2
GO:0042149	cellular response to glucose starvation	0.00499905	0.258641	XBP1, NUAK2, MYBBP1A, ZC3H12A, UPP1
GO:0016310	phosphorylation	0.00515908	0.260714	PRPS1, FLT4, PRKX, LIMD1, MAPK7, NUAK2, TBK1, IRAK1, AKT1, PIP5K1A, MAP3K8, MAP4K5, MAPK6, MAP2K3, MAP3K3, PLK3, NEK6, CSNK2A2, STAT3, DYRK1A, IRAK3, HIPK1, ERN1, GAK, CDK12, MAP3K14
GO:0031663	lipopolysaccharide-mediated signaling pathway	0.00563539	0.268049	IRAK1, IRAK2, AKT1, CCL2, MTDH
GO:0042771	intrinsic apoptotic signaling pathway in response to DNA damage by p53 class mediator	0.00563539	0.268049	BCL3, EP300, HIPK1, SIRT1, TOPORS
GO:0002755	MyD88-dependent toll-like receptor signaling pathway	0.0056743	0.268049	TNIP1, IRAK2, IRAK3, REG3G
GO:0032496	response to lipopolysaccharide	0.00686185	0.317251	STAT5B, DUSP10, IRAK1, PTGER1, ERBIN, FAS, IRAK3, TNFRSF26, GNG12, LITAF, JUNB, TNFRSF1A
GO:0051865	protein autoubiquitination	0.00721305	0.326541	RNF115, HECTD1, TRAF6, UBE2D3, ERCC8, RNF4
GO:0042127	regulation of cell proliferation	0.00743072	0.327843	IL4RA, E030030I06RIK, KLF4, SAT1, SIRT1, TOPORS, TNFRSF1A, GNL3, FAS, TNFSF9, STAT6, TNFRSF26, JUNB
GO:0071499	cellular response to laminar fluid shear stress	0.00769442	0.327843	XBP1, MAPK7, KLF4
GO:0002693	positive regulation of cellular extravasation	0.00769442	0.327843	PECAM1, CCL2, ICAM1
GO:0043032	positive regulation of macrophage activation	0.00798712	0.33377	TNIP2, IL4RA, THBS1, HAVCR2
GO:0006281	DNA repair	0.00825628	0.338508	UVRAG, PAXIP1, USP3, ACTR5, DOT1L, UBE2D3, SMC5, INO80, BACH1, YY1, SLX4, REV3L, SPRTN, ERCC8, TRIP12, NFRKB
GO:0006413	translational initiation	0.0084511	0.340079	EIF6, EIF4H, EIF1A, EIF2B1, EIF4E, EIF4B
GO:0006953	acute-phase response	0.00871607	0.344364	STAT5B, PLSCR1, SAA3, STAT3, REG3G
GO:0006364	rRNA processing	0.00960223	0.367055	PDCD11, PES1, CHD7, CCDC86, NAT10, RRP1B, WBP11, SIRT1, FTSJ3
GO:0071364	cellular response to epidermal growth factor stimulus	0.00962823	0.367055	STAT5B, MED1, ZFP36, AKT1, PTPN12
GO:0006888	ER to Golgi vesicle-mediated transport	0.00986042	0.369426	TBC1D20, RAB35, HYOU1, ERGIC2, YKT6, SEC24C, SEC23B
GO:0048511	rhythmic process	0.0105035	0.382902	KLF10, MYBBP1A, NFIL3, THRAP3, EP300, SIRT1, NPAS2, RELB, ARNTL
GO:0070301	cellular response to hydrogen peroxide	0.0105725	0.382902	OSER1, MAPK7, TNFAIP3, STAT6, KLF4, SIRT1
GO:0001525	angiogenesis	0.0109083	0.388587	MED1, XBP1, ANXA2, FLT4, PRKX, SAT1, SIRT1, GNA13, ZC3H12A, PECAM1, CCL2, TGFBI, WASF2
GO:0048661	positive regulation of smooth muscle cell proliferation	0.0110985	0.388986	STAT5B, IRAK1, TRAF6, AKT1, IL6RA, THBS1, ZFP143
GO:0008380	RNA splicing	0.0116135	0.39499	PRPF38B, DHX8, WBP11, IWS1, SRRM1, GCFC2, RBM15B, THRAP3, CWC22, RNPS1, CDK12, SMN1, RBM5
GO:0070534	protein K63-linked ubiquitination	0.0116334	0.39499	RNF115, HECTD1, TRAF6, ARIH2, RNF4
GO:0015031	protein transport	0.0124095	0.41486	ARF4, XBP1, POM121, MCFD2, TMED10, PDCD6IP, RHBDF2, AP4E1, VPS26B, PSEN1, ARFGAP2, ARHGAP33, NUP93, LSG1, RAB35, CHMP2A, UBAP1, CHMP4B, NUP88, RAB7B, YKT6, SEC23B, TMED5, ARF6
GO:0006265	DNA topological change	0.0139243	0.432594	TOP3B, TOP2B, TOP3A
GO:0061099	negative regulation of protein tyrosine kinase activity	0.0139243	0.432594	MVP, SH3BP5, PTPN2
GO:0032922	circadian regulation of gene expression	0.0139308	0.432594	NCOR1, MYBBP1A, SIRT1, NPAS2, RELB, ARNTL
GO:0035924	cellular response to vascular endothelial growth factor stimulus	0.0140697	0.432594	ERN1, XBP1, FLT4, AKT1
GO:0043011	myeloid dendritic cell differentiation	0.0140697	0.432594	TRAF6, TNFSF9, PSEN1, RELB
GO:0051092	positive regulation of NF-kappaB transcription factor activity	0.0141345	0.432594	IRAK1, IRAK2, TRAF6, IRAK3, CFLAR, RAB7B, MTDH, ICAM1
GO:0051726	regulation of cell cycle	0.0162035	0.48903	NRAS, GADD45A, PES1, STAT3, CSNK2A2, DOT1L, JUNB, ARNTL
GO:0034115	negative regulation of heterotypic cell-cell adhesion	0.017628	0.510741	MAPK7, TNFAIP3, KLF4
GO:0039702	viral budding via host ESCRT complex	0.017628	0.510741	PDCD6IP, CHMP2A, CHMP4B
GO:0003417	growth plate cartilage development	0.017628	0.510741	MMP13, RARA, THBS1
GO:0007159	leukocyte cell-cell adhesion	0.0178674	0.510867	TNIP1, ITGA5, EZR, ICAM1
GO:0070373	negative regulation of ERK1 and ERK2 cascade	0.0190504	0.532907	DUSP4, TNIP1, RANBP9, KLF4, EZR, PTPN2
GO:0042981	regulation of apoptotic process	0.0191287	0.532907	IRAK2, TRAF6, BCL3, RARA, FAS, IRAK3, CFLAR, TNFRSF26, RBM5, TNFRSF1A, BIRC3
GO:0043154	negative regulation of cysteine-type endopeptidase activity involved in apoptotic process	0.0202043	0.555746	AKT1, EP300, CFLAR, FNIP1, KLF4, THBS1
GO:0007264	small GTPase mediated signal transduction	0.0236985	0.64371	GNA13, ARHGAP33, ARF4, NRAS, RAB31, NKIRAS2, SH2D3C, RAB35, ARHGAP1, RAB7B, ARF6, RND1
GO:0001889	liver development	0.024051	0.645221	STAT5B, MED1, HMGCL, XBP1, MAN2A1, RARA, ARF6
GO:2000637	positive regulation of gene silencing by miRNA	0.026114	0.675545	ZFP36, STAT3, LIMD1
GO:0070914	UV-damage excision repair	0.026114	0.675545	ACTR5, INO80, SIRT1
GO:0045647	negative regulation of erythrocyte differentiation	0.026114	0.675545	STAT5B, ZFP36, MAFB
GO:2000352	negative regulation of endothelial cell apoptotic process	0.0270076	0.683305	MAPK7, TNIP2, TNFAIP3, ICAM1
GO:0006955	immune response	0.0271598	0.683305	CBLB, THBS1, TNFRSF1A, PLSCR1, NFIL3, CCL7, TRAF6, CD28, CCL2, FAS, TNFSF9, TNFRSF26, MAP3K14
GO:0045600	positive regulation of fat cell differentiation	0.0273573	0.683305	XBP1, ZFP36, ZC3H12A, AKT1, SAV1
GO:0046777	protein autophosphorylation	0.0285644	0.705345	ERN1, MAP3K3, IRAK1, IRAK2, FLT4, NEK6, DYRK1A, PRKX, IRAK3, CDK12
GO:0001934	positive regulation of protein phosphorylation	0.0294414	0.707173	XBP1, ANXA2, FNDC1, FLT4, BRAT1, AKT1, EP300, PSEN1, FNIP1, SIRT1
GO:0030316	osteoclast differentiation	0.0296147	0.707173	SBNO2, TRAF6, GAB2, JUNB
GO:0006890	retrograde vesicle-mediated transport, Golgi to ER	0.0296147	0.707173	ARF4, UVRAG, TMED10, ERGIC2
GO:0010458	exit from mitosis	0.0308589	0.728875	CTDP1, CHMP2A, CHMP4B
GO:0032755	positive regulation of interleukin-6 production	0.0331179	0.765588	IL1RL2, TNFSF9, IL6RA, TBC1D23, RAB7B
GO:0032729	positive regulation of interferon-gamma production	0.0331179	0.765588	NRAS, BCL3, TNFSF9, IL12RB1, HAVCR2
GO:0000184	nuclear-transcribed mRNA catabolic process, nonsense-mediated decay	0.035212	0.805429	ETF1, RNPS1, DCP1A, SMG5
GO:0060397	JAK-STAT cascade involved in growth hormone signaling pathway	0.0359146	0.805694	STAT5B, SOCS3, STAT3
GO:0071260	cellular response to mechanical stimulus	0.0359652	0.805694	GCLC, GADD45A, AKT1, FAS, MAP3K14, TNFRSF1A
GO:0045444	fat cell differentiation	0.0376881	0.835675	MED1, NIPBL, CEBPD, EP300, KLF4, 4932438A13RIK
GO:0071347	cellular response to interleukin-1	0.0394607	0.866143	YY1, CCL7, SAA3, ZC3H12A, CCL2, ICAM1
GO:0045727	positive regulation of translation	0.044177	0.943456	EIF6, BCL3, EP300, LARP4B, THBS1
GO:0008360	regulation of cell shape	0.0451117	0.943456	GNA13, MKLN1, CCL7, PXN, CCL2, LIMD1, EZR, ICAM1
GO:0097010	eukaryotic translation initiation factor 4F complex assembly	0.0462409	0.943456	EIF4H, EIF4B
GO:0044565	dendritic cell proliferation	0.0462409	0.943456	TBK1, AZI2
GO:1990418	response to insulin-like growth factor stimulus	0.0462409	0.943456	XBP1, AKT1
GO:0071900	regulation of protein serine/threonine kinase activity	0.0462409	0.943456	UVRAG, SIRT1
GO:0033627	cell adhesion mediated by integrin	0.0468906	0.943456	ITGA5, ICAM1, FBN1
GO:0045824	negative regulation of innate immune response	0.0468906	0.943456	TNFAIP3, IRAK3, HAVCR2
GO:0001935	endothelial cell proliferation	0.0468906	0.943456	ERN1, XBP1, PRKX
GO:0048589	developmental growth	0.0479108	0.95514	NIPBL, SRF, EIF4H, IL6RA
GO:0010628	positive regulation of gene expression	0.049535	0.978541	MED1, STAT3, PRKAG1, LRRC32, KLF4, TNFRSF1A, RELB, HCFC1, YY1, PLSCR1, NFIL3, ZC3H12A, CD28, RARA, EP300, EZR

## Sheet: Sheet 6
Supplemental Table 6. The GO enrichment analysis for the genes within M7.
GO terms	Description	P value*	FDR	Involved genes
GO:0006810	transport	1.44617e-08	1.73251e-05	RAB9, NDUFA11, PHAX, AIFM3, LAPTM4A, MPC2, CHP2, PTGDS, TESC, SDHA, SLC5A6, SLC25A15, SLC25A17, NDUFS5, RBP1, CHMP3, VDAC1, NDUFS1, UQCRC2, SLC25A12, SLC25A14, RTN3, CHRNA4, NDUFB5, ARL3, TIMM9, CRABP1, ATP5J, HIGD1A, LRRC52, TRPM1, ATP5B, COMMD9, KCNMB2, ATP6V1H, KCNN2, SLC38A3, NDUFA9, LRRC26, SLC12A5, NDUFA5, PRAF2, SLC4A10, SLC16A11, PEX13, TMCO3, PEX14, GULP1, SLC16A13, SLC8A3, MOB4, P2RX6, …
GO:0006811	ion transport	0.000178652	0.107013	LRRC26, SLC12A5, CHRNA4, SLC4A10, ATP5J, TMCO3, LRRC52, SLC8A3, TRPM1, SLC5A6, P2RX6, ATP5B, COMMD9, GLRB, KCNMB2, FXYD1, ATP6V1H, KCNN2, FXYD6, VDAC1, SLC38A3, KCNK2, SFXN5
GO:0006629	lipid metabolic process	0.000430254	0.171815	CERS5, GAL3ST1, TECR, SLC16A11, PRKAG2, HSD17B12, ACSL3, HACD3, CYP39A1, ATP5B, PLA2G16, PTDSS1, LPCAT4, PTPMT1, NDUFAB1, THEM4, SPTSSB, HACL1, PTGDS
GO:0006885	regulation of pH	0.000828479	0.248129	SLC9A2, SLC9A6, SLC4A10, CHP2, SLC26A4
GO:0006633	fatty acid biosynthetic process	0.00115888	0.252645	TECR, NDUFAB1, PRKAG2, HSD17B12, ACSL3, HACD3, PTGDS
GO:0055114	oxidation-reduction process	0.00126534	0.252645	EGLN1, NDUFA9, WWOX, NDUFA5, NDUFA11, NDUFB5, GPX6, TECR, PDHB, HSD17B12, SDHA, HIGD1A, CYP39A1, LDHB, AIFM3, CCS, TMLHE, SCCPDH, NDUFS5, NDUFAB1, NDUFS1, UQCRC2, PCYOX1
GO:0051453	regulation of intracellular pH	0.00223694	0.382836	SLC9A2, ATP5B, SLC9A6, SLC4A10, SLC26A4
GO:0021762	substantia nigra development	0.00303802	0.454944	YWHAQ, S100A1, ATP5J, CALM3, YWHAH
GO:0046034	ATP metabolic process	0.00366906	0.488392	ATP5B, GUK1, ATP5J, AK3, NDUFS1
GO:0006915	apoptotic process	0.0099838	0.998333	WWOX, RTN3, BEX2, TIGAR, MTFP1, TM2D1, CCK, GULP1, POLB, AIFM3, GAS2, EMC4, THEM4, VDAC1, DNASE1, RNF152, TNFRSF21, MAP2K6
GO:0006105	succinate metabolic process	0.0104557	0.998333	GHR, SUCLA2, SDHA
GO:0006099	tricarboxylic acid cycle	0.0107584	0.998333	SUCLA2, IDH3B, PDHB, SDHA
GO:0006631	fatty acid metabolic process	0.0126102	0.998333	GHR, TECR, NDUFAB1, PRKAG2, THEM4, ACSL3, HACD3, PTGDS
GO:0006814	sodium ion transport	0.0144964	0.998333	SLC9A2, SLC5A6, SLC8A3, COMMD9, SLC4A10, CHP2, SLC38A3
GO:0051480	regulation of cytosolic calcium ion concentration	0.0179719	0.998333	FKBP1B, FXYD1, TMEM64, PVALB
GO:0005977	glycogen metabolic process	0.0239592	0.998333	EPM2A, PPP1R3C, PPP1R3E, PRKAG2
GO:0055085	transmembrane transport	0.0321219	0.998333	TRPM1, SLC5A6, SLC8A3, SLC12A5, SLC25A17, SLC16A11, VDAC1, SLC26A4, SLC25A12, TMCO3, SFXN5, SLC16A13
GO:0032981	mitochondrial respiratory chain complex I assembly	0.0327004	0.998333	NDUFAF6, NDUFS5, NDUFAF5
GO:0070936	protein K48-linked ubiquitination	0.0408813	0.998333	UBE2Q2, UBE2E1, RNF152, RNF187
GO:0032094	response to food	0.0473678	0.998333	GHR, GH, TMEM135

## Sheet: Sheet 7
Supplemental Table 7. The KEGG enrichment analysis for the genes within M4&M13.
KEGG terms	Description	P value*	FDR	Involved genes
mmu04380	Osteoclast differentiation	1.02977e-09	2.24489e-07	SIRPB1B, SIRPB1A, IFNGR1, NFATC1, TNFRSF11A, GAB2, PIK3R5, FOSL2, TNFRSF1A, RELB, OSCAR, IKBKB, SOCS3, FCGR3, FCGR4, CTSK, IL1B, TRAF6, AKT1, ACP5, TAB2, RAC1, MAP3K14, JUNB
mmu04064	NF-kappa B signaling pathway	5.4637e-08	4.83638e-06	UBE2I, CSNK2A2, TNFAIP3, BCL10, TNFRSF11A, CFLAR, TNFRSF1A, RELB, ICAM1, IKBKB, IRAK1, IL1B, TRAF6, TAB2, BCL2A1A, MAP3K14, BCL2A1B, MYD88, BIRC3
mmu04668	TNF signaling pathway	6.65557e-08	4.83638e-06	MAP2K3, MMP3, TNFAIP3, CFLAR, MMP9, PIK3R5, TNFRSF1A, ICAM1, IKBKB, SOCS3, IL1B, BCL3, AKT1, CCL2, FAS, MAP3K8, TAB2, MAP3K14, JUNB, BIRC3
mmu05169	Epstein-Barr virus infection	3.51406e-05	0.00191516	MAP2K3, ENTPD1, STAT3, H2-K1, TNFAIP3, PIK3R5, RELB, ICAM1, IKBKB, TBK1, IRAK1, TRAF6, AKT1, TAB2, VIM, MAP3K14, JAK3, H2-Q10
mmu04630	Jak-STAT signaling pathway	8.00194e-05	0.00297614	STAT5B, IFNGR1, STAT3, IL4RA, IL6RA, IFNLR1, CSF2RB, PIK3R5, CSF2RB2, SOCS3, LEPR, PIM1, AKT1, EP300, STAT6, IL12RB1, JAK3, CRLF2
mmu05152	Tuberculosis	9.54529e-05	0.00297614	PLK3, ITGAM, APAF1, IFNGR1, BCL10, TNFRSF1A, FCGR3, IRAK1, IRAK2, FCGR4, IL1B, TRAF6, LAMP2, RFX5, AKT1, EP300, TLR6, CLEC4E, ATP6V0D2, MYD88
mmu04722	Neurotrophin signaling pathway	0.000122526	0.00297614	MAP3K3, PRKCD, IRAK3, PSEN1, PIK3R5, IKBKB, NRAS, MAPK7, IRAK1, IRAK2, TRAF6, MAPKAPK2, AKT1, RAC1, SH2B2, ZFP110
mmu05162	Measles	0.000124303	0.00297614	STAT5B, IFNGR1, CSNK2A2, STAT3, MSN, TNFAIP3, PIK3R5, TBK1, IRAK1, IL1B, TRAF6, CD28, AKT1, FAS, TAB2, JAK3, MYD88
mmu04060	Cytokine-cytokine receptor interaction	0.000131191	0.00297614	CCR1, IFNGR1, IL1R2, TNFRSF9, IL4RA, IL6RA, IFNLR1, CSF2RB, TNFRSF11A, IL17RA, TNFRSF1A, CXCL16, CSF2RB2, CCL9, CCL7, IL1B, CXCR2, LEPR, CCL2, FAS, TNFSF9, IL12RB1, TNFRSF4, CRLF2
mmu04210	Apoptosis	0.00013652	0.00297614	IKBKB, CSF2RB2, APAF1, AKT1, FAS, CSF2RB, CFLAR, MAP3K14, TNFRSF1A, BIRC3, PIK3R5
mmu04620	Toll-like receptor signaling pathway	0.000217989	0.00432014	MAP2K3, PIK3R5, IKBKB, TBK1, IRAK1, CTSK, IL1B, TRAF6, AKT1, MAP3K8, TAB2, TLR6, RAC1, MYD88
mmu05142	Chagas disease (American trypanosomiasis)	0.000265696	0.00482681	IFNGR1, CFLAR, PIK3R5, TNFRSF1A, IKBKB, PPP2CB, IRAK1, IL1B, TRAF6, AKT1, CCL2, FAS, TLR6, MYD88
mmu04062	Chemokine signaling pathway	0.000390324	0.00654544	CCR1, STAT5B, PRKCD, PXN, STAT3, ADCY3, GNG12, PIK3R5, CXCL16, IKBKB, NRAS, GRK3, CCL9, GNGT2, CCL7, CXCR2, AKT1, CCL2, RAC1, JAK3
mmu04142	Lysosome	0.000424266	0.00660643	CTSA, CTSZ, AP4E1, LITAF, GNS, GLB1, CTSK, LAMP2, ACP5, MAN2B1, GUSB, ATP6V0D2, ARSB, CTSB, AP1M1
mmu04010	MAPK signaling pathway	0.000579094	0.00841616	DUSP4, MAP2K3, MAP3K3, GADD45A, SRF, NFATC1, GNG12, TNFRSF1A, RELB, IKBKB, NRAS, FGF7, MAPK7, DUSP10, IL1B, TRAF6, MAPKAPK2, AKT1, FAS, MAP3K8, TAB2, RAC1, MAP3K14
mmu05168	Herpes simplex infection	0.000826557	0.0112618	TBP, IFNGR1, CSNK2A2, H2-K1, MED8, CFP, TNFRSF1A, HCFC1, ARNTL, IKBKB, SOCS3, TBK1, IL1B, TRAF6, CCL2, FAS, EP300, TAB2, MYD88, H2-Q10
mmu05164	Influenza A	0.00416774	0.0494751	MAP2K3, NLRX1, IFNGR1, PIK3R5, TNFRSF1A, ICAM1, IKBKB, SOCS3, TBK1, DDX39B, IL1B, AKT1, CCL2, FAS, EP300, MYD88
mmu05140	Leishmaniasis	0.00425932	0.0494751	FCGR3, ITGAM, IRAK1, FCGR4, IFNGR1, IL1B, TRAF6, TAB2, MYD88
mmu05166	HTLV-I infection	0.00431205	0.0494751	MAP3K3, STAT5B, XBP1, TBP, ANAPC7, SRF, IL1R2, H2-K1, ADCY3, NFATC1, PIK3R5, TNFRSF1A, RELB, ICAM1, IKBKB, NRAS, ZFP36, AKT1, EP300, MAP3K14, JAK3, H2-Q10
mmu05161	Hepatitis B	0.0065564	0.0691265	STAT5B, APAF1, STAT3, NFATC1, MMP9, PIK3R5, IKBKB, NRAS, TBK1, AKT1, FAS, EP300, STAT6, MYD88
mmu00480	Glutathione metabolism	0.00665897	0.0691265	GGT5, GCLC, ODC1, G6PDX, GSR, MGST1, LAP3, GGT1
mmu05221	Acute myeloid leukemia	0.00735138	0.0728455	IKBKB, STAT5B, NRAS, STAT3, PIM1, RARA, AKT1, PIK3R5
mmu04621	NOD-like receptor signaling pathway	0.00809569	0.0767331	IKBKB, IL1B, TRAF6, ERBIN, CCL2, TNFAIP3, TAB2, BIRC3
mmu05205	Proteoglycans in cancer	0.00873329	0.0793274	PXN, STAT3, PLAUR, MSN, CBLB, THBS1, MMP9, PIK3R5, NRAS, TFAP4, AKT1, SDC1, FAS, ITGA5, RAC1, EZR, EIF4B
mmu04145	Phagosome	0.0100327	0.0869953	MSR1, ITGAM, H2-K1, THBS1, SEC61A1, TUBB6, FCGR3, FCGR4, LAMP2, TLR6, ITGA5, RAC1, RAB7B, ATP6V0D2, H2-Q10
mmu05145	Toxoplasmosis	0.0103756	0.0869953	IKBKB, MAP2K3, IRAK1, IFNGR1, TRAF6, STAT3, AKT1, TAB2, MYD88, TNFRSF1A, BIRC3
mmu04932	Non-alcoholic fatty liver disease (NAFLD)	0.0117713	0.0950422	MLXIP, XBP1, PRKAG1, IL6RA, PIK3R5, TNFRSF1A, IKBKB, ERN1, SOCS3, IL1B, LEPR, AKT1, FAS, RAC1
mmu05144	Malaria	0.0127728	0.0994453	IL1B, PECAM1, CCL2, SDC1, THBS1, MYD88, ICAM1
mmu03015	mRNA surveillance pathway	0.0161502	0.121405	PPP2CB, CPSF7, DAZAP1, FIP1L1, DDX39B, ETF1, RNPS1, PABPC1L, SMG5, SRRM1
mmu05323	Rheumatoid arthritis	0.0182741	0.132792	IL1B, CTSK, MMP3, CD28, CCL2, ACP5, TNFRSF11A, ATP6V0D2, ICAM1
mmu04920	Adipocytokine signaling pathway	0.0269335	0.189403	IKBKB, SOCS3, STAT3, PRKAG1, LEPR, AKT1, ACSL4, TNFRSF1A
mmu00030	Pentose phosphate pathway	0.0323416	0.213889	GPI1, PRPS1, H6PD, G6PDX, PGM2
mmu05321	Inflammatory bowel disease (IBD)	0.0323777	0.213889	IFNGR1, IL1B, STAT3, IL4RA, NFATC1, STAT6, IL12RB1
mmu04931	Insulin resistance	0.0354097	0.227039	IKBKB, MLXIP, SOCS3, PTPN1, STAT3, PRKCD, PRKAG1, AKT1, TNFRSF1A, PIK3R5
mmu05202	Transcriptional misregulation in cancer	0.0372495	0.232011	ITGAM, IL1R2, DOT1L, MMP3, MMP9, KLF3, AFF1, ETV6, NCOR1, NFKBIZ, RARA, BCL2A1A, BCL2A1B
mmu04144	Endocytosis	0.0388869	0.235482	PDCD6IP, H2-K1, IZUMO1R, CBLB, VPS26B, ARFGAP2, GRK3, RAB31, TRAF6, CXCR2, RAB35, CHMP2A, PIP5K1A, CHMP4B, FOLR2, LDLRAP1, H2-Q10, ARF6
mmu03013	RNA transport	0.0451509	0.266024	POM121, UBE2I, SRRM1, NUP93, DDX39B, RNPS1, NUP88, SMN1, PABPC1L, EIF1A, EIF2B1, EIF4E, EIF4B
mmu04068	FoxO signaling pathway	0.0470392	0.269857	IKBKB, PLK3, NRAS, GADD45A, STAT3, PRKAG1, AKT1, EP300, SIRT1, KLF2, PIK3R5

## Sheet: Sheet 8
Supplemental Table 8. The KEGG enrichment analysis for the genes within M7.
KEGG terms	Description	P value*	FDR	Involved genes
mmu00190	Oxidative phosphorylation	3.39712e-07	5.87702e-05	NDUFA9, NDUFA5, NDUFA11, NDUFB5, COX4I2, ATP5J, SDHA, ATP5B, PPA2, NDUFS5, NDUFAB1, ATP6V1H, NDUFS1, UQCRC2
mmu05012	Parkinson's disease	7.60606e-07	6.57924e-05	NDUFA9, NDUFA5, NDUFA11, NDUFB5, COX4I2, ATP5J, SDHA, ATP5B, NDUFS5, NDUFAB1, VDAC1, NDUFS1, UQCRC2, PRKACB
mmu01100	Metabolic pathways	1.88033e-06	0.000108433	DDC, AHCYL2, GAL3ST1, NDUFA11, NDUFB5, COX4I2, ADK, PDXP, ATP5J, HSD17B12, PDHB, LDHB, ATP5B, PTDSS1, AUH, GUK1, IDH3B, PGK1, ATP6V1H, BPNT1, PTGDS, HMGCLL1, ST3GAL3, NDUFA9, KL, CERS5, NDUFA5, CYP2J9, ACSL3, SDHA, QRSL1, PLA2G16, SUCLA2, LPCAT4, NDUFS5, NDUFAB1, PI4KA, SMS, POLR3H, NDUFS1, UQCRC2, PFKM, ASPA
mmu05010	Alzheimer's disease	2.78986e-05	0.00120661	NDUFA9, NDUFA5, NDUFA11, NDUFB5, COX4I2, ATP5J, SDHA, ATP5B, NDUFS5, NDUFAB1, CALM3, NDUFS1, UQCRC2
mmu05016	Huntington's disease	8.36738e-05	0.00289511	NDUFA9, NDUFA5, NDUFA11, NDUFB5, COX4I2, ATP5J, SDHA, ATP5B, NDUFS5, NDUFAB1, VDAC1, NDUFS1, UQCRC2
mmu04932	Non-alcoholic fatty liver disease (NAFLD)	0.000223495	0.00644412	NDUFA9, NDUFA11, NDUFA5, NDUFB5, NDUFS5, COX4I2, NDUFAB1, PRKAG2, NDUFS1, UQCRC2, SDHA
mmu01130	Biosynthesis of antibiotics	0.00246014	0.0608006	LDHB, SUCLA2, FNTA, IDH3B, PGK1, AK3, BPNT1, PDHB, SDHA, PFKM, PCYOX1
mmu04146	Peroxisome	0.011077	0.230217	SLC25A17, HACL1, ACSL3, PEX13, HMGCLL1, PEX14
mmu00480	Glutathione metabolism	0.0119766	0.230217	GSTA4, GPX6, GSTA2, SMS, GSTM5
mmu00020	Citrate cycle (TCA cycle)	0.0147461	0.255108	SUCLA2, IDH3B, PDHB, SDHA
mmu05230	Central carbon metabolism in cancer	0.0199664	0.314018	TIGAR, NTRK3, PDHB, PFKM, SIRT3
mmu00620	Pyruvate metabolism	0.0250358	0.360933	LDHB, HAGHL, ACYP2, PDHB
mmu01200	Carbon metabolism	0.0402517	0.535658	SUCLA2, IDH3B, PGK1, PDHB, SDHA, PFKM
mmu01212	Fatty acid metabolism	0.0496373	0.613375	TECR, HSD17B12, ACSL3, HACD3

## Sheet: Sheet 9
Supplemental Table 9. The GO enrichment analysis for the genes within M6.
GO terms	Description	P value*	FDR	Involved genes
GO:0006351	transcription, DNA-templated	4.49523e-16	8.07583e-13	CCNK, ZFP687, CRTC3, PRDM4, WWC1, NAB2, JMJD1C, HR, AHR, IKZF2, ETS2, IKZF5, SAP130, MAP3K7, SOX4, TLE3, ZFP335, SAP30BP, KDM2A, TLE1, ZFP1, RFX3, ARID5B, ZFP618, FOXP4, EMSY, PIAS1, ILF3, ZFP46, COL4A2, EWSR1, KAT6A, DDIT3, ERF, ADNP, ATF5, ATF3, SF1, KMT2E, NOTCH1, KMT2A, GLIS3, CREM, ZFP507, GATA2, PRDM10, PHF21A, NPAT, ZFP57, NACC1, HIVEP1, HIVEP2, BPTF, WWTR1, EGR1, JUN, CREBBP, POU2F1, SMAD…
GO:0006355	regulation of transcription, DNA-templated	5.2577e-16	8.07583e-13	CCNK, ZFP687, CRTC3, ZFP169, PRDM4, WWC1, NAB2, JMJD1C, HR, AHR, IKZF2, ETS2, IKZF5, RPS6KA4, 9130019O22RIK, SAP130, ZFP282, MAP3K7, SOX4, TLE3, ZFP335, SAP30BP, ZFP973, KDM2A, TLE1, ZFP1, RFX3, ARID5B, ZFP618, FOXP4, EMSY, PIAS1, ILF3, ZFP46, EWSR1, KAT6A, DDIT3, ERF, ZFP7, ADNP, ZFP850, ATF5, ATF3, SF1, KMT2E, ZFP623, NOTCH1, KMT2A, ZFP868, GLIS3, CREM, ZFP507, GATA2, PRDM10, PHF21A, SBNO1, NPA…
GO:0045893	positive regulation of transcription, DNA-templated	4.64515e-09	4.75663e-06	CITED1, CHD8, AHR, ETS2, ING2, MED13, CDH1, FNTB, SOX4, ACVR1, PBRM1, TCF12, TFE3, AXIN1, RFX3, ARNT, FOS, ARID1A, ZFP90, PIAS1, ILF3, ELF3, DDIT3, KAT6A, ROR2, IRF6, ATF5, PPARD, IFNAR1, KMT2E, NOTCH1, KMT2A, SRC, LRP5, FOXK1, RELA, NPAT, CAND1, SERTAD1, SERTAD2, ZKSCAN17, MEF2D, BPTF, SPEN, EGR1, JUN, CREBBP, SMAD3, WNT7A, HINFP, HIPK2, SMARCA4, NR4A2, NFKBIA, NR4A1, NR4A3, BAMBI, TAF8
GO:0045944	positive regulation of transcription from RNA polymerase II promoter	1.16895e-08	8.88295e-06	CSRNP1, CCNK, CRTC3, CHD8, TCF20, LDB2, IKZF2, ETS2, RPS6KA4, MED13, MED10, ZMIZ2, TUNAR, SOX4, KDM6B, TEAD4, ACVR1, NCOA2, KLF12, KLF13, NCOA3, TCF12, TFE3, RFX3, CASK, ARNT, ASH1L, FOS, PPRC1, PRPF6, ELF3, DDIT3, TET3, MAML3, RAD54L2, ATF5, ATF3, ENG, HDAC5, ZFP148, NOTCH1, KMT2A, ZBTB49, GLIS3, LRP5, CREM, NR2C2, GATA2, EGFR, RELA, SERTAD1, EPCAM, PLAGL1, NRIP1, ZFP382, MEF2D, BRD4, WWTR1, EGR…
GO:0016477	cell migration	1.44579e-08	8.88295e-06	SRC, WWC1, CUL3, SDC3, PTPRK, PVR, PODXL, TNN, MYO18A, TNS3, SRGAP1, PDGFRB, PDGFRA, ST14, PDPK1, FNDC3B, VEGFA, EFNA1, ARC, PEAK1, PTK7, BAMBI, SPATA13, SPECC1L, FAT1, DCHS1, BCAR1, EPHA2, HBEGF
GO:0000122	negative regulation of transcription from RNA polymerase II promoter	5.26193e-08	2.69411e-05	CHD8, WWC1, AHR, N4BP2L2, ETS2, PPP1R13L, SUFU, SAP130, ANKRD2, ZFP366, TGIF1, NCOA2, KLF12, TLE1, ARID5B, FOXP4, ARID1A, ZFP90, PIAS1, NFX1, DDIT3, ERF, LCOR, ATF3, PPARD, HDAC5, ZFP148, NOTCH1, CUL3, GLIS3, GATA2, PHF21A, RNF2, RELA, MNT, ZFP57, NRIP1, HIVEP1, BEND3, ZKSCAN17, ZFP382, SKIL, BPTF, SPEN, WWTR1, EGR1, JUN, CREBBP, SMAD3, CBX4, VDR, WFS1, HINFP, HIPK2, VEGFA, SMARCA4, NFKB2, NR4A2,…
GO:0007155	cell adhesion	2.00112e-07	7.80055e-05	COL18A1, PTPRS, TINAGL1, SRC, LAMC3, LAMA4, COL12A1, SDC3, LAMC2, PTPRK, THBS2, F11R, NID1, NID2, THBS4, TM9SF4, NUAK1, FLRT2, PODXL, CDH1, PDPN, CTNNA1, SVEP1, MPZL3, CTNNAL1, COL28A1, CADM4, CXADR, TNFRSF12A, PCDHGC5, ITGA3, PTK7, SPECC1L, TRIP6, ITGA11, CD9, DSG2, ESAM, DCHS1, PKP3, FAT4, FREM1, FERMT2, SDK2, NECTIN2, BCAR1, EPHA2, ENG
GO:0030335	positive regulation of cell migration	2.03139e-07	7.80055e-05	COL18A1, CEMIP, NOTCH1, ZFP703, IRS1, LAMC2, SYNE2, EGFR, PODXL, PDPN, ACVR1, PDGFRB, PDGFRA, SMAD3, SPHK1, RRAS2, ACTN4, PLET1, VEGFA, PTP4A1, MYO1C, TRIP6, NUMB, F2RL1, ROR2, LGR6, BCAR1, HBEGF
GO:0030198	extracellular matrix organization	4.02745e-07	0.00013747	PDGFRA, COL18A1, LAMC3, LAMA4, TFIP11, LAMC2, TNFRSF11B, DMP1, NID1, NID2, SMARCA4, NFKB2, ELF3, COL4A2, SPINT1, COL4A1, GFOD2, COL4A6, ATP7A, MPZL3
GO:0007179	transforming growth factor beta receptor signaling pathway	3.3855e-06	0.00104003	ACVR1, JUN, SMAD3, CITED1, SMURF2, SRC, SMURF1, PTPRK, FOS, HIPK2, BAMBI, SKIL, MAP3K7, FERMT2, ENG
GO:0070830	bicellular tight junction assembly	1.24796e-05	0.00348521	OCLN, DLG1, CLDN3, MARVELD2, CDH1, PARD3, MARVELD3, ACTN4, ALOXE3
GO:0048008	platelet-derived growth factor receptor signaling pathway	1.64363e-05	0.00420769	PDGFRB, PDGFRA, MYO1E, CSRNP1, SRC, RAPGEF1, ARID5B, PLAT, PTPN11, BCAR1
GO:0006468	protein phosphorylation	2.24285e-05	0.0051387	DDR1, CAMK2D, DYRK2, MAST4, SRC, MAST2, TESK1, EGFR, RPS6KA4, NUAK1, MKNK2, PDK4, TLK2, TRPM7, MAP3K7, MAP4K3, MARK2, BRD4, ACVR1, PDGFRB, PDGFRA, CDK18, DAPK1, RIPK2, PDPK1, TNK1, LMTK2, CASK, VRK3, HIPK2, ICK, ILF3, SNRK, PEAK1, PRKD3, PTK7, PTPRA, ULK2, ROR1, ROR2, SIK2, SGK1, TRIB1, CDK13, STK40, FRK, EPHA2, TAF1
GO:0098609	cell-cell adhesion	2.34186e-05	0.0051387	UNC45A, LAD1, CREBBP, USO1, TACSTD2, HDLBP, PPL, VASN, GOLGA3, GPRC5A, EPCAM, PPP1R13L, COBLL1, PACSIN2, SFN, DCHS1, FLNB, SNX9, PKP3, MARK2, EIF4G1, HSPA1A, PLEC
GO:0034097	response to cytokine	4.08629e-05	0.00836873	JUN, CITED1, FOS, SERPINA3N, OSMR, PTGS2, RELA, NFKB2, FOSL1, FNTB, TIMP1, IL6ST, SKIL, PTGES
GO:0045216	cell-cell junction organization	4.95727e-05	0.00895808	CLDN6, OCLN, SMAD3, CXADR, MARVELD2, CLDN9, MARVELD3, CRB3
GO:0046697	decidualization	4.95727e-05	0.00895808	VDR, CDH1, STC2, LIF, ASH1L, PTGS2, DEDD, PPARD
GO:0016569	covalent chromatin modification	9.14577e-05	0.0156088	KMT2E, HDAC5, KDM5B, KMT2A, PHF20, CHD8, CHD6, JMJD1C, PHF21A, ING2, UBN1, TLK2, BEND3, KDM6A, BRD4, KDM6B, BRD2, PBRM1, KDM2A, CBX4, ASH1L, ARID1A, EMSY, SMARCA4, CARM1, KAT6A, TET3
GO:0016310	phosphorylation	9.84758e-05	0.015922	DDR1, CAMK2D, DYRK2, SGMS1, MAST4, SRC, MAST2, TESK1, EGFR, PAPSS2, GK5, RPS6KA4, NUAK1, MKNK2, PDK4, TLK2, TRPM7, MAP3K7, MAP4K3, MARK2, ACVR1, PDGFRB, PDGFRA, CDK18, DAPK1, RIPK2, PDPK1, SPHK1, TNK1, ITPK1, LMTK2, CASK, HIPK2, ICK, ITPKC, SNRK, PEAK1, PRKD3, ULK2, PI4KB, ROR2, SIK2, SGK1, CDK13, STK40, FRK, EPHA2, TAF1
GO:0070373	negative regulation of ERK1 and ERK2 cascade	0.000111255	0.0170888	ACE2, ERRFI1, SLC9A3R1, DLG1, DUSP1, DYNLT1C, CNKSR3, RAPGEF1, LIF, SPRY2, VRK3, ATF3
GO:0030154	cell differentiation	0.00013534	0.0197983	HMX3, TENM4, CITED1, PTPRQ, SHB, GOLGA3, PEG10, SH3PXD2B, TLK2, AGFG1, UNC45A, TLE3, SEMA6A, TNFRSF12A, SEMA6D, TCF12, RFX3, ARNT, NAV1, TFIP11, ELF3, KIF2A, PARD3, PSME4, ROR2, IRF6, HMX2, EPHA2, PPARD, ADCYAP1R1, TSG101, NOTCH1, TMTC3, ECSCR, NEDD4L, FOXK1, NR2C2, EFNA5, GATA2, CAND1, RGS20, FLNB, MEF2D, MARK2, ANGPT2, GADD45B, SMURF1, TNK1, HSPA2, PUM1, PLET1, VEGFA, SETX, NR6A1, TAF8, FRK, ZP…
GO:0008284	positive regulation of cell proliferation	0.000189923	0.0265201	COL18A1, SLC35F6, NOTCH1, ZFP703, LRP5, LAMC2, PTGS2, CLU, EGFR, RELA, CRKL, EPCAM, FNTB, NACC1, TIMP1, TNS3, SOX4, PDGFRB, PDGFRA, WWTR1, JUN, WNT7B, SPHK1, LIF, WNT7A, NGF, OSMR, VEGFA, HIPK2, SMARCA4, DLG1, GAREM1, BAMBI, CLCF1, CARM1, CLDN7, IL6ST, CRLF1, ATF3, HMX2, PPARD, HBEGF, TAF1
GO:0001568	blood vessel development	0.000218034	0.0289668	PDGFRB, LOX, LAMA4, SPHK1, RAPGEF1, AHR, ATP7A, SHB, CRKL, VEGFA, SMARCA4, EPHA2
GO:0016337	single organismal cell-cell adhesion	0.000226303	0.0289668	DSP, KIRREL, CXADR, SRC, PVR, EGFR, DLG1, CDH1, PARD3, PDPN, RAPGEF1, FAT1, ESAM, PKP3, CEP41
GO:0016311	dephosphorylation	0.000249541	0.0295715	DUSP5, PTPRS, PTPRQ, DUSP1, STYX, PTPN11, PTPRK, PTPN23, PTPRG, DUSP14, PTP4A1, PTP4A2, PTPRB, PTPRA, PTPN4
GO:0001701	in utero embryonic development	0.00025028	0.0295715	CCNK, NOTCH1, ELL, CUL3, CHD8, N4BP2L2, RIC8A, MUC1, CDH1, ATP7A, KDM6A, ACVR1, PDGFRB, TEAD4, PDGFRA, SLC34A2, ZFP335, KDM2A, SMAD3, WNT7B, AXIN1, VEGFA, HINFP, SMARCA4, FOSL1, MYO1E, MAFF, ERF
GO:0001525	angiogenesis	0.000285978	0.032538	COL18A1, CLIC4, JUN, NOTCH1, ANGPT2, TNFRSF12A, WNT7B, SERPINE1, ECSCR, WNT7A, SHB, PTGS2, HS6ST1, VEGFA, EFNA1, PTPRB, COL4A2, COL4A1, MMRN2, KRIT1, MAP3K7, HBEGF, EPHA2, ENG
GO:0006470	protein dephosphorylation	0.000307869	0.0337777	PTPRS, PTPRQ, DUSP1, STYX, PPP2R2A, PTPN11, CTDSPL2, PTPRK, PTPN23, PTPRG, DUSP14, CTTNBP2NL, PTP4A1, PTP4A2, PTPRB, PTPRA, PTPN4
GO:0016338	calcium-independent cell-cell adhesion via plasma membrane cell-adhesion molecules	0.000439276	0.046533	CLDN6, CLDN4, CLDN3, CLDN9, CLDN23, CLDN7, ESAM
GO:0030512	negative regulation of transforming growth factor beta receptor signaling pathway	0.000463182	0.0474299	SMURF2, CHST11, BAMBI, SMURF1, PDPK1, PEG10, CIDEA, PMEPA1, SKIL, VASN
GO:0045892	negative regulation of transcription, DNA-templated	0.000733157	0.0726534	HDAC5, KDM5B, ZFP148, TSG101, NOTCH1, CITED1, ZFP703, SRC, CHD8, NAB2, ZBTB21, CREM, FOXK1, HR, PTPRK, AHR, RELA, ZFP12, NACC1, HIVEP1, ZFP382, BEND5, SPEN, DUSP5, NCOA2, JUN, POU2F1, TLE1, CBX4, VDR, ATP8B1, RFX3, ZFP90, HINFP, SMARCA4, ILF3, GON4L, ELF3, DDIT3, KAT6A, BHLHE40, ATF5, ATF3
GO:0007275	multicellular organism development	0.000848208	0.081428	HMX3, COL18A1, WDR47, TENM4, CITED1, SHB, GOLGA3, SUFU, FNTB, TLK2, PHACTR4, AGFG1, PDGFRB, UNC45A, PDGFRA, TLE3, ZFP335, SEMA6A, TNFRSF12A, SEMA6D, TCF12, KRT8, AXIN1, RFX3, SHROOM3, NAV1, SHROOM4, PTP4A1, ARC, ELF3, KIF2A, PSME4, TET3, NUMB, ROR2, FREM1, HMX2, ADCYAP1R1, NOTCH1, ECSCR, LRP5, FOXK1, EFNA5, EGFR, ZFP57, FLRT2, PDPN, HIVEP1, HIVEP2, MEF2D, MARK2, ANGPT2, GADD45B, VDR, WNT7B, WNT7A…
GO:0001843	neural tube closure	0.000950432	0.0836401	TGIF1, SEC24B, ST14, KDM2A, SDC4, SHROOM3, COBL, ARID1A, SPINT1, PTK7, SUFU, PHACTR4, KDM6A
GO:0048286	lung alveolus development	0.000951191	0.0836401	ERRFI1, PDPN, LIF, TMTC3, ATP7A, HS6ST1, TNS3, STK40, VEGFA
GO:0016055	Wnt signaling pathway	0.000952931	0.0836401	TLE3, TLE1, WNT7B, CUL3, CHD8, AXIN1, LRP5, WNT7A, DDB1, SLC9A3R1, ZNRF3, PTK7, DDIT3, ROR1, HBP1, TAX1BP3, ROR2, AMOTL1, LGR6, MARK2, FERMT2
GO:0006915	apoptotic process	0.0010046	0.0857255	DIDO1, CSRNP1, CLIC4, DYRK2, SGMS1, CITED1, ECSCR, HTT, TNFRSF11B, SHB, UBE2Z, EVA1A, PPP1R13L, PEG10, MKNK2, CHAC1, S100A14, PHLDA1, MAP3K7, MEF2D, DEDD, PEA15A, SAP30BP, SEMA6A, TNFRSF12A, GADD45B, DAPK1, FEM1B, RIPK2, CIDEA, AXIN1, RASSF7, HIP1R, MUL1, HIPK2, NR4A1, TMEM214, DDIT3, LTBR, SGK1, PPARD, EPHA2
GO:0030216	keratinocyte differentiation	0.00105162	0.0873132	DSP, CLIC4, ST14, NOTCH1, TSG101, UBN1, SFN, IRF6, PTGS2, SPRR1A, SMARCA4, EPHA2
GO:0006357	regulation of transcription from RNA polymerase II promoter	0.00110977	0.0897162	NOTCH1, ZFP704, CITED1, CUL3, GLIS3, FOXK1, AHR, LDB2, MED15, ETS2, MED13, MED10, NRIP1, TEAD4, BRD2, SMAD3, KLF13, TLE1, ARID5B, SUPT6, FOS, SOD2, NFKB2, FOSL1, FUBP1, MAFF, ERF, FOSB, LCOR, ATF5, BRWD1, ATF3
GO:0097320	membrane tubulation	0.00129447	0.101965	EHD2, PACSIN2, SNX9, WHAMM, FNBP1L
GO:0051591	response to cAMP	0.00143249	0.110015	FOSL1, JUN, CITED1, DUSP1, CARM1, CREM, FOSB, FOS, RELA
GO:0043524	negative regulation of neuron apoptotic process	0.00155296	0.113652	JUN, CITED1, PDPK1, WFS1, HTT, NGF, SOD2, VEGFA, HIPK2, NR4A2, NR4A3, CLCF1, UBE2V2, ADNP, ATP7A, CRLF1, LGMN
GO:0032570	response to progesterone	0.00155383	0.113652	FOSL1, CLDN4, ABHD2, FOSB, DSG2, FOS, RELA
GO:0048146	positive regulation of fibroblast proliferation	0.00182583	0.130441	PDGFRB, TGIF1, PDGFRA, JUN, SPHK1, SERPINE1, FNTB, FNDC3B, FBRS, EGFR
GO:0010628	positive regulation of gene expression	0.00234708	0.160724	KDM5B, SGMS1, CITED1, SRC, SERPINE1, C1QTNF1, LMNA, KDM6A, EGR1, CREBBP, KDM2A, SMAD3, TLE1, VDR, ITGA3, WNT7B, NCOA3, TCF12, LIF, WNT7A, NGF, VEGFA, HINFP, HGS, FUBP1, KAT6A, SPRY2, ATF3, PPARD, ZPR1, ENG
GO:0035914	skeletal muscle cell differentiation	0.00235435	0.160724	EGR1, NR4A1, NOTCH1, PLAGL1, MAFF, ANKRD2, FOS, MEF2D, ATF3
GO:0060444	branching involved in mammary gland duct morphogenesis	0.00244298	0.163149	DDR1, KDM5B, SRC, LRP5, EPHA2
GO:0008285	negative regulation of cell proliferation	0.00258274	0.168813	DDR1, TSG101, NOTCH1, KMT2A, ZBTB49, PTPRK, PTGS2, RERG, SLC9A3R1, ING2, FNTB, SH3BP4, SOX4, TGIF1, JUN, PBRM1, SMAD3, KLF13, VDR, LIF, SOD2, FOSL1, SPRY2, CD9, TAX1BP3, ROR2, IRF6, ATF5, HSPA1A, PTGES
GO:0008360	regulation of cell shape	0.00278325	0.178128	MYO10, SHROOM3, ARHGEF18, VRK3, FGD1, VEGFA, EPS8, SLC9A3R1, DLG1, BAMBI, PDPN, ANXA7, PLEKHO1, BRWD1, FERMT2
GO:0030308	negative regulation of cell growth	0.00293546	0.184035	SMAD3, PRDM4, TNK1, OSGIN1, MUL1, FOXK1, RERG, SMARCA4, SERTAD1, SERTAD2, SH3BP4, ENPP1, PPARD, HSPA1A
GO:0009791	post-embryonic development	0.00379005	0.214254	KDM5B, CSRNP1, KMT2A, TMTC3, ARID5B, ASH1L, SOD2, ZFX, IGF2R, NR4A2, CHST11, PPP1R13L, ATF5
GO:0072006	nephron development	0.0038184	0.214254	ITGA3, DCHS2, DCHS1, FAT4
GO:0003183	mitral valve morphogenesis	0.0038184	0.214254	EFNA1, ACVR1, DCHS1, SOX4
GO:0038063	collagen-activated tyrosine kinase receptor signaling pathway	0.0038184	0.214254	DDR1, COL4A2, COL4A1, COL4A6
GO:1902042	negative regulation of extrinsic apoptotic signaling pathway via death domain receptors	0.00383592	0.214254	DAPK1, SERPINE1, TMBIM1, TNFRSF23, PEA15A, TNFRSF22
GO:0003382	epithelial cell morphogenesis	0.00383592	0.214254	CLDN3, CDH1, FAT1, JMJD1C, FLNB, SIPA1L3
GO:0007369	gastrulation	0.00409197	0.219606	RIC8A, ACVR1, SMAD3, NR4A3, CUL3, HTT, ARID1A
GO:0007566	embryo implantation	0.00409689	0.219606	DDR1, TEAD4, HMX3, CDH1, STC2, LIF, ARID1A, PTGS2, PPARD
GO:0044804	nucleophagy	0.00414621	0.219606	WDR45B, ATG2A, ATG4B, WIPI1, WIPI2
GO:0045599	negative regulation of fat cell differentiation	0.00428931	0.223335	WWTR1, SMAD3, DDIT3, AXIN1, ENPP1, SOD2, GATA2, VEGFA
GO:0090090	negative regulation of canonical Wnt signaling pathway	0.00453974	0.232435	EGR1, WWTR1, NOTCH1, ZNRF3, CDH1, CHD8, DDIT3, RAPGEF1, AXIN1, RGS20, ROR2, BICC1
GO:0007156	homophilic cell adhesion via plasma membrane adhesion molecules	0.00474372	0.238897	CADM4, PCDHGA5, PCDHGC5, PCDHGA1, PCDHB21, PVR, CDH1, DCHS2, FAT1, DSG2, DCHS1, ESAM, FAT4, PCDH1, SDK2, NECTIN2
GO:0035994	response to muscle stretch	0.00523889	0.257761	NFKBIA, JUN, ANKRD2, FOS, RELA
GO:0032496	response to lipopolysaccharide	0.00528612	0.257761	JUN, NOTCH1, CITED1, CXCL1, TNFRSF11B, FOS, SOD2, PTGS2, NFKB2, NFKBIA, MTA1, NOCT, GNRH1, LTBR, S100A14, TRIB1, PTGES, IFNAR1
GO:0038091	positive regulation of cell proliferation by VEGF-activated platelet derived growth factor receptor signaling pathway	0.00542926	0.258085	PDGFRB, PDGFRA, VEGFA
GO:0048812	neuron projection morphogenesis	0.00553932	0.258085	ZFP335, WNT7B, NGF, ATP7A, SGK1, SRGAP2, CLU, EGFR, THBS4
GO:0034332	adherens junction organization	0.00554479	0.258085	DSP, CDH1, SRC, NUMB
GO:0035264	multicellular organism growth	0.00572879	0.262669	WWTR1, CLIC4, WDR48, KDM2A, NCOA3, ARID5B, LNCPINT, PTPN11, ZFX, PPP1R13L, ATF5, STK40, KDM6A
GO:0046777	protein autophosphorylation	0.00591533	0.267234	PDGFRB, DDR1, PDGFRA, CAMK2D, DAPK1, SRC, TNK1, LMTK2, EGFR, PEAK1, MKNK2, ULK2, TRPM7, SIK2, MARK2, TAF1, BRD4
GO:0008286	insulin receptor signaling pathway	0.00603411	0.268649	ZFP106, BAIAP2L1, PTPRA, IRS1, PDK4, SIK2, SOGA1, BCAR1
GO:0014911	positive regulation of smooth muscle cell migration	0.00614422	0.269644	PDGFRB, EGR1, CAMK2D, SRC, SEMA6D, IL6ST, F3
GO:0045765	regulation of angiogenesis	0.00637743	0.275936	EFNA1, ANGPT2, RNH1, TNFRSF12A, SERPINE1, EPHA2
GO:0006366	transcription from RNA polymerase II promoter	0.00680364	0.290289	EGR1, JUN, SMAD3, KLF13, PRDM4, ELL, GLIS3, AHR, FOS, SCAF8, ELF3, LCOR, FOSB, HIVEP2
GO:0007492	endoderm development	0.00697027	0.293324	TNRC6C, ANKRD17, ARC, NOTCH1, ANGPT2, SMAD3, BPTF
GO:0042060	wound healing	0.00731823	0.302386	PDGFRB, DSP, PDGFRA, LOX, SDC4, PTK7, SERPINE1, FNTB, TIMP1, EGFR, PPARD
GO:0043401	steroid hormone mediated signaling pathway	0.00746038	0.302386	NR4A2, NR4A1, NR6A1, NR4A3, VDR, ABHD2, NR2C2, PPARD
GO:0048661	positive regulation of smooth muscle cell proliferation	0.00748091	0.302386	PDGFRB, EGR1, CAMK2D, JUN, NR4A3, PTGS2, EGFR, HBEGF, VEGFA, TGM2
GO:0017015	regulation of transforming growth factor beta receptor signaling pathway	0.00796683	0.31767	SMAD3, ITGA3, ZFP703, TRIM33, ENG
GO:0000902	cell morphogenesis	0.00810296	0.31767	TENM4, VDR, CUL3, PDPN, SHROOM3, AHR, CLU, EGFR, SHROOM4, SMARCA4
GO:0043066	negative regulation of apoptotic process	0.00816925	0.31767	SRC, CHD8, HTT, CLU, EGFR, RELA, CHST11, EPCAM, MYO18A, CTNNA1, TIMP1, IER3, PDGFRB, JUN, KDM2A, SMAD3, DAPK1, DUSP1, SPHK1, NCOA3, HIP1R, WNT7A, SOD2, VEGFA, PIAS1, SMARCA4, SETX, DDB1, NR4A3, KRT18, CLDN7, SPRY2, GNRH1, SGK1, ATF5, STK40, HSPA1B, PPARD
GO:0035556	intracellular signal transduction	0.00830493	0.318909	MAST4, SRC, MAST2, EGFR, RPS6KA4, NUAK1, RASSF1, MKNK2, TLK2, TNS3, MAP4K3, MARK2, PEA15A, PDGFRB, CISH, WSB2, DAPK1, PDPK1, DUSP1, MYO9A, ICK, SNRK, PRKD3, SPATA13, GPR182, SIK2, RAPGEF5, SGK1, DGKI
GO:0007507	heart development	0.00950031	0.348416	ACVR1, HDAC5, PBRM1, NOTCH1, CXADR, ITGA3, PTPN11, AP2B1, FOXP4, SOD2, GATA2, BICC1, CRKL, SMARCA4, LOX, PTK7, SH3PXD2B, SOX4, PPARD, ENG, KDM6A
GO:0042127	regulation of cell proliferation	0.00969483	0.348416	NOTCH1, SRC, SERPINE1, TNK1, WNT7A, TNFRSF11B, PTGS2, EGFR, PIAS1, NFKBIA, CHST11, FNTB, CTNNA1, SPRY2, LTBR, SGK1, ATF5, FRK, PPARD
GO:0043086	negative regulation of catalytic activity	0.0099135	0.348416	NOTCH1, CAND1, FAF2, TMBIM1, TIMP1, ATP7A
GO:0001974	blood vessel remodeling	0.00992838	0.348416	PBRM1, ANGPT2, LIF, AHR, ATP7A, VEGFA, TGM2
GO:0031953	negative regulation of protein autophosphorylation	0.0102097	0.348416	ERRFI1, JUN, ENPP1, ENG
GO:0006497	protein lipidation	0.0102097	0.348416	ABCA1, WDR45B, WIPI1, WIPI2
GO:0035413	positive regulation of catenin import into nucleus	0.0102097	0.348416	KANK1, SMAD3, BAMBI, EGFR
GO:0046330	positive regulation of JNK cascade	0.010385	0.348416	GADD45B, RIPK2, WNT7B, AXIN1, WNT7A, F2RL1, LTBR, MAP3K7, HIPK2
GO:0060437	lung growth	0.0105478	0.348416	PDGFRB, PDGFRA, SPRY2
GO:0022009	central nervous system vasculogenesis	0.0105478	0.348416	WNT7B, WNT7A, ENG
GO:0003273	cell migration involved in endocardial cushion formation	0.0105478	0.348416	NOTCH1, DCHS1, ENG
GO:0072137	condensed mesenchymal cell proliferation	0.0105478	0.348416	DCHS2, DCHS1, FAT4
GO:0071376	cellular response to corticotropin-releasing hormone stimulus	0.0105478	0.348416	NR4A2, NR4A1, NR4A3
GO:0043065	positive regulation of apoptotic process	0.0107187	0.350298	NOTCH1, USP27X, SRC, PTGS2, CLU, ING2, TRPM7, PHLDA1, SOX4, TGM2, PDGFRB, JUN, TNFRSF12A, GADD45B, RIPK2, DUSP1, OSGIN1, HIP1R, ANO6, NGF, IGF2R, FOSL1, NR4A1, DDX19A, DDIT3
GO:2001237	negative regulation of extrinsic apoptotic signaling pathway	0.011087	0.358518	ACVR1, SGMS1, SRC, LMNA, HTT, RELA, VEGFA
GO:0007173	epidermal growth factor receptor signaling pathway	0.0123379	0.394814	GAREM1, SRC, PDPK1, PTPN11, EGFR, BCAR1, HBEGF
GO:0018105	peptidyl-serine phosphorylation	0.0125958	0.397094	CAMK2D, MAST4, SRC, PDPK1, MAST2, LMTK2, VRK3, HIPK2, PRKD3, MKNK2, TLK2, SGK1, TAF1
GO:0045056	transcytosis	0.0131814	0.397094	SRC, USO1, MAL2, GPIHBP1
GO:1900025	negative regulation of substrate adhesion-dependent cell spreading	0.0131814	0.397094	KANK1, TACSTD2, ACTN4, EFNA5
GO:0010035	response to inorganic substance	0.0131814	0.397094	NR4A2, NR4A1, FNTB, ADNP
GO:0048711	positive regulation of astrocyte differentiation	0.0131814	0.397094	NOTCH1, CLCF1, LIF, IL6ST
GO:0042787	protein ubiquitination involved in ubiquitin-dependent protein catabolic process	0.0133105	0.397094	SMURF2, RNF24, SMURF1, AMFR, CUL3, UBR4, NEDD4L, UBE2Z, DDB1, ABTB2, KBTBD4, HECTD2, TAF1
GO:0031668	cellular response to extracellular stimulus	0.0135726	0.397094	NR4A2, FOSL1, ADNP, FOS, HAMP
GO:0035329	hippo signaling	0.0135726	0.397094	TEAD4, WWTR1, DCHS1, FAT4, AMOTL1
GO:1902895	positive regulation of pri-miRNA transcription from RNA polymerase II promoter	0.0135726	0.397094	JUN, SMAD3, FOS, RELA, SMARCA4
GO:0060070	canonical Wnt signaling pathway	0.01459	0.422834	SMAD3, ZNRF3, PTK7, WNT7B, CHD8, AXIN1, LRP5, WNT7A, SOX4, KDM6A
GO:0032922	circadian regulation of gene expression	0.0157214	0.451367	NCOA2, MTA1, KMT2A, NOCT, NRIP1, BHLHE40, CREM, AHR
GO:0048514	blood vessel morphogenesis	0.0164478	0.464423	ANGPT2, COL4A1, AHR, SHB, VEGFA, EPHA2
GO:0070306	lens fiber cell differentiation	0.016594	0.464423	KDM5B, SMAD3, SLC7A11, SKIL
GO:0032463	negative regulation of protein homooligomerization	0.0170783	0.464423	SRC, CLDN7, CLU
GO:0060948	cardiac vascular smooth muscle cell development	0.0170783	0.464423	PBRM1, NOTCH1, VEGFA
GO:0070431	nucleotide-binding oligomerization domain containing 2 signaling pathway	0.0170783	0.464423	NFKBIA, RIPK2, RELA
GO:0072659	protein localization to plasma membrane	0.0170833	0.464423	EHD2, DLG1, CDH1, DENND4C, FCHO2, ZDHHC23, DCHS1, CRB3
GO:0030334	regulation of cell migration	0.0178273	0.480398	NOTCH1, LAMA4, SPATA13, LMNA, SDC3, PLXNA2, LDB2, PTPN23, SMARCA4
GO:0007623	circadian rhythm	0.0183815	0.485408	SETX, NCOA2, CLDN4, JUN, NOCT, BHLHE40, UBC, CREM, NGF, ATF5, EGFR
GO:0035335	peptidyl-tyrosine dephosphorylation	0.0184208	0.485408	DUSP5, PTPRS, DUSP1, PTPN11, DUSP14
GO:0030324	lung development	0.0184872	0.485408	PDGFRA, NOTCH1, LOX, ITGA3, WNT7B, PDPN, LIF, TMTC3, SPRY2, EGFR, STK40, VEGFA
GO:2000737	negative regulation of stem cell differentiation	0.0204533	0.515022	CCNK, NOTCH1, NCOA3, CDK13
GO:0060993	kidney morphogenesis	0.0204533	0.515022	WWTR1, GCNT4, AHR, SOX4
GO:0010839	negative regulation of keratinocyte proliferation	0.0204533	0.515022	VDR, CASK, SFN, PTPRK
GO:0051642	centrosome localization	0.0204533	0.515022	SEMA6A, PARD3, PLXNA2, SYNE2
GO:2000811	negative regulation of anoikis	0.0204533	0.515022	NOTCH1, TLE1, SRC, PDK4
GO:0009416	response to light stimulus	0.0211988	0.525184	RIC8A, KMT2A, DUSP1, BHLHE40, FOS
GO:0010800	positive regulation of peptidyl-threonine phosphorylation	0.0211988	0.525184	CEMIP, RIPK2, SPHK1, AXIN1, S1PR2
GO:0001889	liver development	0.0215193	0.528858	JUN, NOTCH1, SMAD3, COBL, LSR, AHR, SOD2, RELA, IGF2R, SMARCA4
GO:0006986	response to unfolded protein	0.0219731	0.535724	EDEM3, DDIT3, FAF2, CHAC1, UBE2J2, THBS4, HSPA1A
GO:0048511	rhythmic process	0.0228311	0.552261	SETX, KDM5B, NCOA2, CREBBP, MTA1, KMT2A, NOCT, NRIP1, BHLHE40, CREM, AHR, NFKB2
GO:0051726	regulation of cell cycle	0.0230837	0.554008	MNT, JUN, GADD45B, WFS1, SRC, ZFP703, SFN, PUM1, SGK1, ATF5, PHACTR4
GO:0007157	heterophilic cell-cell adhesion via plasma membrane cell adhesion molecules	0.0239627	0.554068	CADM4, CXADR, TENM4, DCHS1, FAT4, PVR, NECTIN2
GO:0050768	negative regulation of neurogenesis	0.0242199	0.554068	NOTCH1, DYNLT1C, WNT7B, WNT7A, ATF5
GO:0010765	positive regulation of sodium ion transport	0.0242199	0.554068	CNKSR3, NEDD4L, CXCL1, PRSS8, SGK1
GO:0046847	filopodium assembly	0.0247621	0.554068	SPATA13, S1PR2, SRGAP2, FGD1
GO:0048011	neurotrophin TRK receptor signaling pathway	0.0247621	0.554068	SRC, LMTK2, PTPN11, BCAR1
GO:0072307	regulation of metanephric nephron tubule epithelial cell differentiation	0.0248898	0.554068	WWTR1, LIF, FAT4
GO:0061038	uterus morphogenesis	0.0248898	0.554068	KDM5B, WNT7A, ASH1L
GO:2000672	negative regulation of motor neuron apoptotic process	0.0248898	0.554068	CLCF1, CRLF1, ZPR1
GO:0010324	membrane invagination	0.0248898	0.554068	HGS, FCHO2, FNBP1L
GO:0061304	retinal blood vessel morphogenesis	0.0248898	0.554068	COL4A1, LRP5, VEGFA
GO:0007420	brain development	0.0254782	0.559526	NAPA, HMX3, ZFP335, CITED1, SPHK1, CHD8, HTT, PTPN11, ATP2B1, SLC7A11, EFNA5, SHROOM4, PTPRG, COL4A1, CD9, HMX2, BPTF
GO:0006897	endocytosis	0.0254992	0.559526	LRP5, HIP1R, AP2B1, FNBP1L, RAB11B, EHD2, MYO1E, CLCN5, ARC, FCHO2, PACSIN2, SH3BP4, SNX9, RIN1, ATP9B
GO:0060135	maternal process involved in female pregnancy	0.027488	0.596834	HMX3, ANGPT2, ITGA3, LIF, DSG2
GO:0034446	substrate adhesion-dependent cell spreading	0.0279766	0.596834	EFNA1, SRC, PEAK1, FNDC3B, SRGAP2, FERMT2
GO:0051898	negative regulation of protein kinase B signaling	0.0279766	0.596834	SLC9A3R1, DLG1, DDIT3, RAPGEF1, MUL1, EPHA2
GO:0060325	face morphogenesis	0.0279766	0.596834	PDGFRA, CSRNP1, KAT6A, SPECC1L, ARID5B, PTPN11
GO:0007169	transmembrane receptor protein tyrosine kinase signaling pathway	0.0288831	0.608618	DDR1, PDGFRB, PDGFRA, ANGPT2, TNK1, ROR1, ROR2, EGFR, FRK, EPHA2
GO:0043433	negative regulation of sequence-specific DNA binding transcription factor activity	0.0290083	0.608618	WFS1, SUFU, KAT6A, DDIT3, BHLHE40, HR, TRIB1, RNF2
GO:1903543	positive regulation of exosomal secretion	0.0295196	0.608618	TSG101, SDC4, HGS, MYO5B
GO:0014912	negative regulation of smooth muscle cell migration	0.0295196	0.608618	SEMA6D, SERPINE1, TRIB1, PPARD
GO:0080182	histone H3-K4 trimethylation	0.0295196	0.608618	ZFP335, KMT2A, TET3, BEND3
GO:0050731	positive regulation of peptidyl-tyrosine phosphorylation	0.0305442	0.625545	EFNA1, PDGFRA, RIPK2, SRC, LIF, ADNP, EFNA5, THBS4, HBEGF, VEGFA
GO:0001892	embryonic placenta development	0.0310064	0.630806	SPINT1, ARNT, GATA2, EGFR, BPTF
GO:0045668	negative regulation of osteoblast differentiation	0.0331149	0.662526	HDAC5, NOTCH1, SMAD3, CITED1, NOCT, FNDC3B, LRP5
GO:0043405	regulation of MAP kinase activity	0.0338595	0.662526	TSG101, HGS, TRIB1
GO:2000144	positive regulation of DNA-templated transcription, initiation	0.0338595	0.662526	SETX, FOSL1, JUN
GO:0061469	regulation of type B pancreatic cell proliferation	0.0338595	0.662526	ERRFI1, NR4A1, NR4A3
GO:0000083	regulation of transcription involved in G1/S transition of mitotic cell cycle	0.0338595	0.662526	NPAT, HINFP, BRD4
GO:0031960	response to corticosteroid	0.0338595	0.662526	NOTCH1, GNRH1, ENG
GO:0072657	protein localization to membrane	0.0347226	0.670866	HGS, SH3PXD2B, AP3D1, FERMT2
GO:0030518	intracellular steroid hormone receptor signaling pathway	0.0347226	0.670866	NCOA2, MED13, NR6A1, CARM1
GO:0016525	negative regulation of angiogenesis	0.0355077	0.677514	ANGPT2, COL4A2, ECSCR, KRIT1, LIF, THBS2, THBS4, EPHA2
GO:0042472	inner ear morphogenesis	0.0355077	0.677514	HMX3, NR4A3, PTPRQ, INSIG2, SPRY2, ROR2, GATA2, HMX2
GO:0048013	ephrin receptor signaling pathway	0.0368612	0.69471	EFNA1, EFNA3, SRC, PTPN11, EFNA5, EPHA2
GO:0018107	peptidyl-threonine phosphorylation	0.0368612	0.69471	ACVR1, CAMK2D, PDPK1, LMTK2, TAF1, HIPK2
GO:0006812	cation transport	0.0378717	0.705335	CHRNA1, CHRNB1, SLC9A4, ATP13A1, ATP13A4, TRPM7, ANO6, ATP7A
GO:0042542	response to hydrogen peroxide	0.0384367	0.705335	PDGFRB, FOSL1, JUN, NR4A3, DUSP1, SRC, SOD2
GO:0043588	skin development	0.0384367	0.705335	DSP, WDR48, ITGA3, SUFU, SFN, IRF6, ATP7A
GO:0048666	neuron development	0.0384367	0.705335	TENM4, LIF, HTT, SOD2, HS6ST1, SKIL, VEGFA
GO:0009314	response to radiation	0.0388026	0.705335	JUN, ANGPT2, IL1R1, SOD2, F11R
GO:0000077	DNA damage checkpoint	0.0388026	0.705335	TIPRL, PTPN11, USP28, PEA15A, HINFP
GO:0001666	response to hypoxia	0.0392138	0.708616	EGR1, CAMK2D, SMAD3, ANGPT2, ARNT, PLAT, ACTN4, SOD2, TM9SF4, VEGFA, NR4A2, MUC1, CLDN3, LONP1, SOX4
GO:0000045	autophagosome assembly	0.0401656	0.712657	ATG16L1, WDR45B, ATG2A, ATG4B, WIPI1, WIPI2
GO:0048745	smooth muscle tissue development	0.0403653	0.712657	PDGFRB, DLG1, AHR, ENG
GO:0010633	negative regulation of epithelial cell migration	0.0403653	0.712657	MARVELD3, TACSTD2, PTPN23, PTPRG
GO:0050730	regulation of peptidyl-tyrosine phosphorylation	0.0403653	0.712657	PDGFRB, EFNA1, EGFR, IFNAR1
GO:0051091	positive regulation of sequence-specific DNA binding transcription factor activity	0.0419206	0.735887	FOSL1, HDAC5, CREBBP, NCOA3, LRP5, ARID5B, NGF, PPRC1, SMARCA4, HIPK2
GO:0043627	response to estrogen	0.0429038	0.747736	PDGFRB, SLC34A2, KRT19, CITED1, CTNNA1, WNT7A, TNFRSF11B, ZFP366
GO:0045746	negative regulation of Notch signaling pathway	0.0430825	0.747736	NFKBIA, NUMB, CHAC1, HIF1AN, GATA2
GO:0045429	positive regulation of nitric oxide biosynthetic process	0.0436441	0.74877	SMAD3, PTX3, SOD2, PTGS2, CLU, EGFR
GO:0071711	basement membrane organization	0.0438733	0.74877	RIC8A, FLRT2, COL4A1
GO:0010042	response to manganese ion	0.0438733	0.74877	SOD2, PTGS2, ATP7A
GO:0035019	somatic stem cell population maintenance	0.0472976	0.802753	KAT6A, LRP5, WNT7A, LDB2, GATA2, SOX4
GO:0070555	response to interleukin-1	0.0476169	0.803732	CITED1, IL1R1, RIPK2, SRC, RELA
GO:0032870	cellular response to hormone stimulus	0.051127	0.858263	NCOA2, JUN, DUSP1, NCOA3, FOSB, FOS

## Sheet: Sheet 10
Supplemental Table 10. The GO enrichment analysis for the genes within M11 and M14.
GO terms	Description	P value*	FDR	Involved genes
M11
GO:0015031	protein transport	0.000329041	0.268169	NUP214, ARF1, TOMM40, SYS1, GOLT1B, IST1, MTX2, PSEN2, TIMM44, SNX11, AAAS, PEX12, SCAMP3, BET1L, VHL, VPS16
GO:0051603	proteolysis involved in cellular protein catabolic process	0.00177294	0.674966	PSMB2, PSMB3, PSMB1, CLPX, PSMA7
GO:0002479	antigen processing and presentation of exogenous peptide antigen via MHC class I, TAP-dependent	0.00248454	0.674966	PSMB2, PSMB3, PSMB1, PSMA7
GO:0000398	mRNA splicing, via spliceosome	0.00355182	0.723683	SF3B5, DBR1, SYF2, RBMX2, DQX1, SNRPC
GO:0032469	endoplasmic reticulum calcium ion homeostasis	0.00692632	1	PSEN2, TMBIM6, GRINA
GO:2001234	negative regulation of apoptotic signaling pathway	0.0247389	1	IGBP1, PSEN2, TMBIM6
GO:0006397	mRNA processing	0.0277472	1	PNN, SF3B5, KIN, DBR1, SYF2, ARL6IP4, HNRNPLL, SMNDC1
GO:0006396	RNA processing	0.0287003	1	DHX34, ZFC3H1, TRNT1, NRDE2
GO:0070059	intrinsic apoptotic signaling pathway in response to endoplasmic reticulum stress	0.0421201	1	PMAIP1, TMBIM6, UBE2K
GO:0043456	regulation of pentose-phosphate shunt	0.0445386	1	HSD11B1, PGAM1
M14
GO:0007275	multicellular organism development	1.31542e-05	0.00966642	SEMA5A, NRP1, DLX3, INTU, SEMA3D, DDX1, DLX6, LRP4, CSRP2, TMEM88, OLFML3, SLIT2, EPHB2, DYNC2H1, WNT5B, FZD5, PRRX1, PAQR5, UNC5B, PRRX2, BMP8A, FZD8, EBF4, NPNT, BMP6, PGF, ANO1, BIN1, CSPG4, MKX, PLPP3, NGEF
GO:0001525	angiogenesis	1.70829e-05	0.00966642	NRP1, FZD5, UNC5B, FZD8, NDNF, HSPG2, PGF, EMCN, COL8A1, CSPG4, PRKD1, TEK, EPHB2, FGFR2
GO:0016126	sterol biosynthetic process	2.36536e-05	0.00966642	SQLE, HMGCS1, PMVK, MSMO1, CYP51, FDFT1
GO:0006695	cholesterol biosynthetic process	5.59336e-05	0.0171436	IDI1, HMGCS1, PMVK, LSS, CYP51, FDFT1
GO:0008202	steroid metabolic process	0.000116894	0.0251462	SULT1A1, HMGCS1, PMVK, LCAT, MSMO1, LDLR, CYP51, FDFT1
GO:0006629	lipid metabolic process	0.000123065	0.0251462	TNXB, PTGIS, HMGCS1, PTGES2, LCAT, MBOAT2, ELOVL6, MSMO1, PLA2G5, LSS, ACSF2, CYP51, SULT1A1, PMVK, THRSP, LDLR, SLC27A2, FDFT1
GO:0030199	collagen fibril organization	0.000148417	0.0259942	ADAMTS2, TNXB, COL14A1, P3H1, MKX, DDR2
GO:0048010	vascular endothelial growth factor receptor signaling pathway	0.000293118	0.0449204	NRP1, PIK3R1, PRKD1, SULF1, PGF
GO:0045880	positive regulation of smoothened signaling pathway	0.000603232	0.0821736	DYNC2H1, INTU, PRRX1, PRRX2, GPC3
GO:0030198	extracellular matrix organization	0.000762444	0.0934756	TNXB, ABI3BP, ADAMTSL2, PXDN, NDNF, NPNT, OLFML2A, HSPG2
GO:0008203	cholesterol metabolic process	0.0011172	0.124464	SQLE, HMGCS1, PMVK, LCAT, LDLR, CYP51, FDFT1
GO:0006694	steroid biosynthetic process	0.00130667	0.124464	HMGCS1, PMVK, MSMO1, LSS, CYP51, FDFT1
GO:0008299	isoprenoid biosynthetic process	0.00131977	0.124464	IDI1, HMGCS1, PMVK, FDFT1
GO:0007413	axonal fasciculation	0.00156848	0.137354	SEMA5A, NRP1, PTPRZ1, EPHB2
GO:0001938	positive regulation of endothelial cell proliferation	0.00184973	0.148421	SEMA5A, PPP1R16B, CCL11, PRKD1, BMP6, PGF
GO:0045669	positive regulation of osteoblast differentiation	0.00197556	0.148421	PRKD1, BMPR1B, NPNT, BMP6, CD276, DDR2
GO:0031290	retinal ganglion cell axon guidance	0.00214933	0.148421	NRP1, SLIT2, EPHB2, BMPR1B
GO:0006644	phospholipid metabolic process	0.00217911	0.148421	TNXB, LCAT, PLA2G5, PLPP3, PLPP2
GO:0042472	inner ear morphogenesis	0.00254205	0.164029	TMIE, PRRX1, DLX6, PRRX2, EPHB2, FGFR2
GO:0016337	single organismal cell-cell adhesion	0.00299628	0.183131	IGSF5, TNXB, EMCN, LMO7, SLIT2, TEK, PLPP3
GO:0009887	organ morphogenesis	0.00313683	0.183131	NRP1, THRB, WNT5B, HHIP, GPC3, EPHB2, FGFR2
GO:0040036	regulation of fibroblast growth factor receptor signaling pathway	0.00343995	0.191699	HHIP, SULF1, FGFR2
GO:0051216	cartilage development	0.00446189	0.237838	PRRX1, PRRX2, BMP8A, SULF1, BMPR1B, BMP6
GO:0007155	cell adhesion	0.0048975	0.250181	FARP2, CD63, COL14A1, NPNT, SULF1, PCDH18, CDH6, MAG, KITL, CDH10, COL8A1, ITGA7, SUSD5, PLPP3, SSX2IP
GO:0001822	kidney development	0.00737146	0.361496	MME, KCNJ8, GPC3, LRP4, SULF1, BMP6, DCN
GO:0030326	embryonic limb morphogenesis	0.0093691	0.409321	DYNC2H1, PRRX1, DLX6, PRRX2, LRP4
GO:0071526	semaphorin-plexin signaling pathway	0.00986185	0.409321	FARP2, SEMA5A, NRP1, SEMA3D
GO:0007169	transmembrane receptor protein tyrosine kinase signaling pathway	0.010195	0.409321	CSPG4, TEK, EPHB2, ANGPTL1, EPHA3, DDR2
GO:0048009	insulin-like growth factor receptor signaling pathway	0.0103543	0.409321	GRB10, PIK3R1, GIGYF2
GO:0018108	peptidyl-tyrosine phosphorylation	0.010436	0.409321	TEK, EPHB2, CLK4, FGFR2, DDR2
GO:0050731	positive regulation of peptidyl-tyrosine phosphorylation	0.0106145	0.409321	NRP1, PTPRZ1, KITL, LRP4, CSPG4, PLPP3
GO:0071773	cellular response to BMP stimulus	0.0106837	0.409321	TNMD, BMPR1B, BMP6, ADAMTS7
GO:0007399	nervous system development	0.0112324	0.417299	SEMA5A, NRP1, INTU, SEMA3D, DPYSL3, NDNF, SLIT2, PRKD1, EPHB2, CPLX2, PCDH18, NGEF
GO:0060976	coronary vasculature development	0.0124433	0.448692	DYNC2H1, GPC3, LTBP1, ADAMTS6
GO:0030154	cell differentiation	0.014677	0.503249	SEMA5A, NRP1, FZD5, PAQR5, SEMA3D, ARHGEF28, BMP8A, LRP4, NPNT, CPLX2, BMP6, PGF, CSRP2, BIN1, CSPG4, PRKD1, SLIT2, BMPR1B, NGEF
GO:0016525	negative regulation of angiogenesis	0.0147773	0.503249	TNMD, HHIP, TEK, SULF1, DCN
GO:0006631	fatty acid metabolic process	0.0170025	0.563381	CYP4A12A, TNXB, PTGIS, PTGES2, ELOVL6, SLC27A2, ACSF2
GO:0010811	positive regulation of cell-substrate adhesion	0.0175293	0.565549	ABI3BP, COL8A1, NDNF, NPNT
GO:0046426	negative regulation of JAK-STAT cascade	0.0186656	0.58677	PTPRD, RTN4RL1, CHAD, DCN
GO:0007160	cell-matrix adhesion	0.0192897	0.591229	CD63, SNED1, TNXB, TEK, NPNT
GO:0045766	positive regulation of angiogenesis	0.0216337	0.646901	SEMA5A, CCL11, PTGIS, TEK, PRKD1, PGF
GO:0009953	dorsal/ventral pattern formation	0.0263241	0.768413	DYNC2H1, HHIP, LRP4, BMPR1B
GO:0098779	mitophagy in response to mitochondrial depolarization	0.0300402	0.856496	EVA1B, ANXA5, PLOD2, MYH11, ZFP189, ADAMTS7
GO:0032332	positive regulation of chondrocyte differentiation	0.0332643	0.919987	THRB, BMPR1B, BMP6
GO:0046777	protein autophosphorylation	0.0337679	0.919987	CDKL5, DAPK3, TEK, PRKD1, CLK4, FGFR2, DDR2
GO:0010976	positive regulation of neuron projection development	0.0353847	0.943079	PTPRZ1, DPYSL3, NDNF, PRKD1, PPP1R9A, EPHA3
GO:0060348	bone development	0.0370725	0.946894	CHAD, P3H1, SULF1, FGFR2
GO:0045785	positive regulation of cell adhesion	0.0370725	0.946894	CD63, EPB41L4B, TNXB, TEK
GO:0045807	positive regulation of endocytosis	0.0421119	0.987913	CD63, BIN1, GPC3
GO:0048844	artery morphogenesis	0.0421119	0.987913	NRP1, PRRX1, PRRX2
GO:0090090	negative regulation of canonical Wnt signaling pathway	0.0452307	0.987913	WNT5B, TMEM88, GPC3, LRP4, ANKRD6
GO:0048843	negative regulation of axon extension involved in axon guidance	0.0452356	0.987913	SEMA5A, NRP1, SEMA3D

[truncated: 1 more sheets: Sheet 11]
